# Supplementary material for: Palladium-catalyzed regioselective direct C–H bond alkoxycarbonylation of 2-arylimidazo[1,2-a]pyridines
Source: Royal Society of Chemistry journal article supplement (doi:10.1039/d1nj00605c), 2021-01-01

*New Journal of Chemistry*

## **Supporting Information**

### **Palladium-Catalyzed Regioselective Direct C-H Bond Alkoxy carbonylation of 2-Arylimidazo[1,2-a]pyridines**

Arezoo Tanbakouchian, Ebrahim Kianmehr\*

School of Chemistry, College of Science, University of Tehran, Tehran

1417614411, Iran.

#### Contents

|                                                                        |        |
|------------------------------------------------------------------------|--------|
| 1. General information                                                 | S2     |
| 2. Typical procedure for the synthesis of N-Acetyl -N-phenylbenzamides | S2     |
| 3. Spectral data                                                       | S2-S4  |
| 4. References                                                          | S4     |
| 5. Copies of <sup>1</sup> H and <sup>13</sup> C NMR spectra            | S5-S42 |

## 1. General Information

All commercially available chemicals and reagents were purchased from Merck or Sigma or commercial distributors and were used without further purification. 2-aryl-imidazo[1,2-a]pyridines were synthesized according to the literature<sup>[1]</sup>. Analytical thin layer chromatography (TLC) was performed on precoated silica gel 60 F<sub>254</sub> plates. The products were purified by preparative column chromatography on silica gel (0.063–0.200 mm, Merck). <sup>1</sup>H NMR (500 MHz) and <sup>13</sup>C NMR (125 MHz) spectra were recorded on an Inova Varian 500 Advanced instrument in CDCl<sub>3</sub> or Methanol-*d*<sub>4</sub>. Electron ionization (EI) mass spectra were obtained using an Agilent 5975C VL MSD (ion source: EI+, 70 eV, 230 °C).

## 2. General Procedure for Synthesis of alkoxy-carbonylated Imidazo[1,2-a]pyridines:

A 10 mL microwave vial was charged with the 2-aryl-imidazo[1,2-a]pyridine derivative (0.2 mmol, 1.0 equiv.), alcohol (0.2 mL), W(CO)<sub>6</sub> (50 mol-%), Pd(OAc)<sub>2</sub> (10 mol-%), Cu(OAc)<sub>2</sub> (0.4 mmol, 2.0 eq.) and DCE (1.5 mL) in air. The reaction vessel was then sealed and immersed in an oil bath, which was preheated at 110 °C, for 16h. After this time, the mixture was cooled to room temperature and then diluted with ethyl acetate and filtered. The residue was purified by column chromatography (n-hexane/EtOAc, 10:3) to yield the desired product.

## 3. Spectral data

### 3.1. Ethyl 2-(*p*-tolyl)imidazo[1,2-a]pyridine-3-carboxylate (3aa)<sup>[2]</sup>

Pale yellow solid (88 %, 49.2 mg), mp 77-79 °C. <sup>1</sup>H NMR (500 MHz, CDCl<sub>3</sub>) δ 9.40 (d, *J* = 7.1 Hz, 1H), 7.75 (d, *J* = 9.0 Hz, 1H), 7.68 (d, *J* = 7.9 Hz, 2H), 7.42 (t, *J* = 7.9 Hz, 1H), 7.25 (d, *J* = 7.8 Hz, 2H), 7.02 (t, *J* = 7.0 Hz, 1H), 4.32 (q, *J* = 7.1 Hz, 2H), 2.42 (s, 3H), 1.25 (t, *J* = 7.0 Hz, 3H). <sup>13</sup>C NMR (125 MHz, CDCl<sub>3</sub>) δ 161.2, 153.6, 147, 138.6, 131.3, 130.1, 128.3, 128.3, 127.9, 117.4, 114, 111.8, 60.4, 21.4, 14.1. MS (IE) *m/z* (relative intensity %) 280 (M<sup>+</sup>, 58), 251 (17), 208 (100), 111 (58), 112 (54), 82 (13). IR ν<sub>(C=O)</sub> 1679.8 cm<sup>-1</sup>

### 3.2. Ethyl 2-phenyl imidazo[1,2-a] pyridine-3-carboxylate (3ba)<sup>[2]</sup>

Pale yellow solid (89 %, 47.3 mg), mp 71-73 °C. <sup>1</sup>H NMR (500 MHz, CD<sub>3</sub>OD) δ 9.41 (d, *J* = 6.9 Hz, 1H), 7.71-7.65 (m, 3H), 7.58 (t, *J* = 7.9 Hz, 1H), 7.48-7.42 (m, 3H), 7.18 (t, *J* = 7.0 Hz, 1H), 4.26 (q, *J* = 7.1 Hz, 2H), 1.17 (t, *J* = 7.1 Hz, 3H). <sup>13</sup>C NMR (125 MHz, CD<sub>3</sub>OD) δ 160.7, 152.6, 146.7, 133.9, 129.9, 128.9, 128.6, 128.1, 127.3, 116.1, 114.5, 111.9, 60.3, 12.9. MS (IE) *m/z* (relative intensity %) 266 (M<sup>+</sup>, 29), 194 (58), 115 (14), 89 (51), 78 (100), 63 (14). IR ν<sub>(C=O)</sub> 1674.1 cm<sup>-1</sup>

### 3.3. Ethyl 2-(4-methoxyphenyl)imidazo[1,2-a]pyridine-3-carboxylate (3ca)

Yellow solid (67 %, 39.6 mg), mp 103-105 °C. <sup>1</sup>H NMR (500 MHz, CD<sub>3</sub>OD) δ 9.41 (d, *J* = 7.0 Hz, 1H), 7.71–7.64 (m, 3H), 7.58 (t, *J* = 7.9 Hz, 0H), 7.16 (t, *J* = 7.0 Hz, 1H), 7.01 (d, *J* = 8.7 Hz, 2H), 4.30 (q, *J* = 7.1 Hz, 2H), 3.88 (s, 3H), 1.23 (t, *J* = 7.1 Hz, 3H). <sup>13</sup>C NMR (125 MHz, CD<sub>3</sub>OD) δ 160.8, 160.5, 152.6, 146.7, 131.3, 131, 128.8, 128.2, 126, 115.9, 114.3, 112.7, 60.3, 54.4, 13. MS (IE) *m/z* (relative intensity %) 296 (M<sup>+</sup>, 100), 267 (21), 251 (18), 224 (78), 209 (42), 78 (20). IR ν<sub>(C=O)</sub> 1683.5 cm<sup>-1</sup>. C<sub>17</sub>H<sub>16</sub>N<sub>2</sub>O<sub>3</sub> (296.32): calcd. C 68.91, H 5.44, N 9.45; found C 68.60, H 5.47, N 9.49.

### 3.4. Ethyl 2-(4-chlorophenyl)imidazo[1,2-a]pyridine-3-carboxylate (3da)<sup>[3]</sup>

Yellow solid (71 %, 42.6 mg) mp 106-108 °C. <sup>1</sup>H NMR (500 MHz, CD<sub>3</sub>OD) δ 9.38 (d, *J* = 7.0 Hz, 1H), 7.71–7.64 (m, 3H), 7.58 (t, *J* = 7.9 Hz, 1H), 7.44 (d, *J* = 8.2 Hz, 2H), 7.17 (t, *J* = 6.9 Hz, 1H), 4.28 (q, *J* = 7.1 Hz, 2H), 1.20 (t, *J* = 7.2 Hz, 3H). <sup>13</sup>C NMR (125 MHz, CD<sub>3</sub>OD) δ 160.5, 151.2, 146.8, 134.6, 132.6, 131.5, 129, 128.2, 127.5, 116.2, 114.7, 112, 60.5, 12.9. MS (IE) *m/z* (relative intensity %) 302 (M+2, 14), 300 (M<sup>+</sup>, 39), 271 (20), 230 (30), 228 (100), 192 (43), 78 (34), 69 (49). IR ν<sub>(C=O)</sub> 1668.3 cm<sup>-1</sup>

### 3.5. Ethyl 2-(3-bromophenyl)imidazo[1,2-a]pyridine-3-carboxylate (3ea)<sup>[3]</sup>

Yellow solid (85 %, 58.5 mg), mp 99-101 °C. <sup>1</sup>H NMR (500 MHz, CDCl<sub>3</sub>) δ 9.44 (d, *J* = 7.0 Hz, 1H), 7.94 (s, 1H), 7.75 (d, *J* = 9.0 Hz, 1H), 7.72 (d, *J* = 7.8 Hz, 1H), 7.56 (d, *J* = 8.0 Hz, 1H), 7.46 (t, *J* = 7.9 Hz, 1H), 7.32 (t, *J* = 7.9 Hz, 1H), 7.07 (t, *J* = 7.0 Hz, 1H), 4.33 (q, *J* = 7.1 Hz, 2H), 1.27 (t, *J* = 8.2 Hz, 3H). <sup>13</sup>C NMR (125 MHz, CDCl<sub>3</sub>) δ 160.8, 151.6, 147, 136.3, 133.3, 131.6, 129.2, 128.8, 128.4, 128.3, 121.4, 117.5, 114.4, 112.1, 60.7, 14.0. MS (IE) *m/z* (relative intensity %) 346 (M+2, 9), 344 (M<sup>+</sup>, 10), 272 (18), 220 (12), 192 (22), 110 (93), 78 (100), 69 (58). IR ν<sub>(C=O)</sub> 1681.7 cm<sup>-1</sup>

### 3.6. Ethyl 2-(3,4-dimethoxyphenyl)imidazo[1,2-a]pyridine-3-carboxylate (3fa)<sup>[4]</sup>

Yellow oil, (68%, 44.3 mg). <sup>1</sup>H NMR (500 MHz, CDCl<sub>3</sub>) δ 9.38 (d, *J* = 6.9 Hz, 1H), 7.71 (d, *J* = 8.9 Hz, 1H), 7.45-7.35 (m, 3H), 7.01 (t, *J* = 7.1 Hz, 1H), 6.93 (d, *J* = 8.2 Hz, 1H), 4.33 (q, *J* = 7.1 Hz, 2H), 3.93 (s, 6H), 1.26 (t, *J* = 7.1 Hz, 3H). <sup>13</sup>C NMR (125 MHz, CDCl<sub>3</sub>) δ 161.1, 153.4, 149.6, 148.2, 147, 128.4, 127.9, 127, 123.3, 117.3, 113.9, 113.4, 111.7, 110.2, 60.4, 55.9, 55.9, 14.2. MS (IE) *m/z* (relative intensity %) 326 (M<sup>+</sup>, 91), 297 (19), 254 (14), 80 (51), 43 (100). IR ν<sub>(C=O)</sub> 1683.9 cm<sup>-1</sup>.

### 3.7. Ethyl 2-(thiophen-2-yl)imidazo[1,2-a]pyridine-3-carboxylate (3ga)

Pale yellow solid (76 %, 41.3 mg), mp 74-76 °C. <sup>1</sup>H NMR (500 MHz, CDCl<sub>3</sub>) δ 9.24 (d, *J* = 7.1 Hz, 1H), 7.99 (d, *J* = 3.8 Hz, 1H), 7.59 (d, *J* = 8.9 Hz, 1H), 7.41 (d, *J* = 5.0 Hz, 1H), 7.29 (t, *J* = 7.9 Hz, 1H), 7.08 (t, *J* = 4.3 Hz, 1H), 6.86 (t, *J* = 7.0 Hz, 1H), 4.41 (q, *J* = 7.2 Hz, 2H), 1.38 (t, *J* = 7.1 Hz, 3H). <sup>13</sup>C NMR (125 MHz, CDCl<sub>3</sub>) δ 160.7, 146.8, 146.6, 136.7, 129.8, 128.4, 128.1, 128.1, 127.3, 117, 113.9, 110.8, 60.8, 14.4. MS (IE) *m/z* (relative intensity %) 272 (M<sup>+</sup>, 81), 244 (15), 200 (100), 155 (15), 78 (45). IR ν<sub>(C=O)</sub> 1684.3 cm<sup>-1</sup>. C<sub>14</sub>H<sub>12</sub>N<sub>2</sub>O<sub>2</sub>S (272.32): calcd. C 61.75, H 4.44, N 10.29; found C 60.92, H 4.39, N 10.34.

### 3.8. Ethyl 8-methyl-2-(*p*-tolyl)imidazo[1,2-a]pyridine-3-carboxylate (3ha)

Pale yellow solid (73 %, 43 mg), mp 91-93 °C. <sup>1</sup>H NMR (500 MHz, CDCl<sub>3</sub>) δ 9.28 (d, *J* = 7.0 Hz, 1H), 7.69 (d, *J* = 8.0 Hz, 2H), 7.26 (d, *J* = 7.9 Hz, 2H), 7.23 (d, *J* = 6.8 Hz, 1H), 6.94 (t, *J* = 7.0 Hz, 1H), 4.33 (q, *J* = 7.2 Hz, 2H), 2.70 (s, 3H), 2.44 (s, 3H), 1.26 (t, *J* = 7.1 Hz, 3H). <sup>13</sup>C NMR (125 MHz, CDCl<sub>3</sub>) δ 161.3, 153.3, 147.4, 138.3, 131.9, 130.2, 128.3, 127.4, 126.7, 126.1, 113.9, 112.2, 60.3, 21.4, 17.1, 14.1. MS (IE) *m/z* (relative intensity %) 294 (M<sup>+</sup>, 78), 265 (24), 249 (16), 222 (100), 91 (14). IR ν<sub>(C=O)</sub> 1675.5 cm<sup>-1</sup>. C<sub>18</sub>H<sub>18</sub>N<sub>2</sub>O<sub>2</sub> (294.35): calcd. C 73.45, H 6.16, N 9.52; found C 73.21, H 6.19, N 9.47.

### 3.9. Ethyl 2-(4-fluorophenyl)-8-methylimidazo[1,2-a]pyridine-3-carboxylate (3ia)

White solid (78%, 46.5 mg), mp 107-109 °C. <sup>1</sup>H NMR (500 MHz, CDCl<sub>3</sub>) δ 9.29 (d, *J* = 7.0 Hz, 1H), 7.77 (t, *J* = 6.4 Hz, 2H), 7.25 (d, *J* = 7.0 Hz, 1H), 7.14 (t, *J* = 9.0 Hz, 2H), 6.97 (t, *J* = 7.0 Hz, 1H), 4.32 (q, *J* = 7.0 Hz, 2H), 2.70 (s, 3H), 1.24 (t, *J* = 7.1 Hz, 3H). <sup>13</sup>C NMR (125 MHz, CDCl<sub>3</sub>) δ 163.1 (d, *J* = 247.7 Hz), 161.1, 152.1, 147.3, 132.1 (d, *J* = 8.5 Hz), 130.9 (d, *J* = 3.4 Hz), 127.5, 126.9, 126.1, 114.5 (d, *J* = 21.6 Hz), 114.2, 112.3, 60.4, 17.1, 14. MS (IE) *m/z* (relative intensity %) 298 (M<sup>+</sup>, 72), 269 (13), 253 (25), 226 (100), 107 (10), 92 (12). IR ν<sub>(C=O)</sub> 1675.6 cm<sup>-1</sup>. C<sub>17</sub>H<sub>15</sub>FN<sub>2</sub>O<sub>2</sub> (298.32): calcd. C 68.45, H 5.07, N 9.39; found C 68.81, H 5.13, N 9.31.

### 3.10. Ethyl 7-methyl-2-(*p*-tolyl)imidazo[1,2-a]pyridine-3-carboxylate (3ja)

Pale yellow solid (77 %, 45.2 mg), mp 83-85 °C. <sup>1</sup>H NMR (500 MHz, CD<sub>3</sub>OD) δ 9.27 (d, *J* = 7.1 Hz, 1H), 7.57 (d, *J* = 8.1 Hz, 2H), 7.46 (s, 1H), 7.26 (d, *J* = 7.8 Hz, 2H), 7.04 (dd, *J* = 7.1, 1.8 Hz, 1H), 4.27 (q, *J* = 7.1 Hz, 2H), 2.48 (s, 3H), 2.41 (s, 3H), 1.20 (t, *J* = 7.1 Hz, 3H). <sup>13</sup>C NMR (125 MHz, CD<sub>3</sub>OD) δ 160.9, 152.8, 147.1, 140.8, 138.7, 131, 129.8, 127.9, 127.3, 116.8, 114.6, 111.5, 60.2, 20, 19.9, 13. MS (IE) *m/z* (relative intensity %) 294 (M<sup>+</sup>, 90), 265 (27), 222 (100), 206 (17), 110 (15), 91 (18), 69 (30). IR ν<sub>(C=O)</sub> 1683.9 cm<sup>-1</sup>. C<sub>18</sub>H<sub>18</sub>N<sub>2</sub>O<sub>2</sub> (294.35): calcd. C 73.45, H 6.16, N 9.52; found C 73.77, H 6.20, N 9.56.

### 3.11. Ethyl 6-methyl-2-(*p*-tolyl)imidazo[1,2-a]pyridine-3-carboxylate (3ka)<sup>[5]</sup>

White solid (71 %, 41.7 mg), mp 85-87 °C.

<sup>1</sup>H NMR (500 MHz, CDCl<sub>3</sub>) δ 9.25 (s, 1H), 7.71-7.64 (m, 3H), 7.32-7.28 (m, 1H), 7.25 (d, *J* = 8.1 Hz, 2H), 4.33 (q, *J* = 7.1 Hz, 2H), 2.44 (s, 6H), 1.27 (t, *J* = 7.1 Hz, 3H). <sup>13</sup>C NMR (125 MHz, CDCl<sub>3</sub>) δ 161.3, 153.4, 146.1, 138.5, 131.5, 130.9, 130.1, 128.3, 126.2, 123.9, 116.6, 111.5, 60.4, 21.4, 18.5, 14.1. MS (IE) *m/z* (relative intensity %) 294 (M<sup>+</sup>, 92), 279 (25), 249 (50), 222 (100), 119 (21), 84 (22). IR ν<sub>(C=O)</sub> 1680.3 cm<sup>-1</sup>

### 3.12. Ethyl 2-(4-methoxyphenyl)-7-methylimidazo[1,2-a]pyridine-3-carboxylate (3la)

Yellow solid (64 %, 39.6 mg), mp 79-81 °C.

<sup>1</sup>H NMR (500 MHz, CDCl<sub>3</sub>) δ 9.26 (d, *J* = 7.1 Hz, 1H), 7.75 (d, *J* = 8.6 Hz, 2H), 7.47 (s, 1H), 6.96 (d, *J* = 8.8 Hz, 2H), 6.84 (dd, *J* = 7.2, 1.8 Hz, 1H), 4.32 (q, *J* = 7.2 Hz, 2H), 3.87 (s, 3H), 2.46 (s, 3H), 1.27 (t, *J* = 7.2 Hz, 3H). <sup>13</sup>C NMR (126 MHz, CDCl<sub>3</sub>) δ 161.3, 160.1, 153.5, 147.7, 139.2, 131.6, 127.6, 127.4, 127.0, 116.4, 116.0, 113.0, 60.3, 55.3, 21.4, 14.2. MS (IE) *m/z* (relative intensity %) 310 (M<sup>+</sup>, 100), 281 (28), 223 (73), 135 (72), 77 (27).

IR ν<sub>(C=O)</sub> 1677.2 cm<sup>-1</sup>. C<sub>18</sub>H<sub>18</sub>N<sub>2</sub>O<sub>3</sub> (310.35): calcd. C 69.66, H 5.85, N 9.03; found C 69.43, H 5.88, N 9.09.

### 3.13. Ethyl 7-chloro-2-(3-methoxyphenyl)imidazo[1,2-a]pyridine-3-carboxylate (3ma)

Off-white solid (82%, 54.1 mg), mp 87-89 °C. <sup>1</sup>H NMR (500 MHz, CDCl<sub>3</sub>) δ 9.53 (s, 1H), 7.70 (d, *J* = 9.4 Hz, 1H), 7.43 (dt, *J* = 9.5, 1.6 Hz, 1H), 7.39-7.30 (m, 3H), 7.03-6.98 (m, 1H), 4.35 (q, *J* = 7.2 Hz, 2H), 3.89 (s, 3H), 1.26 (t, *J* = 6.8 Hz, 3H). <sup>13</sup>C NMR (125 MHz, CDCl<sub>3</sub>) δ 160.9, 159, 153.7, 145.3, 135.2, 129.2, 128.6, 126.3, 122.8, 122.4, 117.7, 115.5, 114.9, 112.5, 60.8, 55.4, 14. MS (IE) *m/z* (relative intensity %) 332 (M+2, 35), 330 (M<sup>+</sup>, 100), 303 (12), 301 (33), 287

(14), 285 (23), 259 (40), 257 (83), 228 (47), 179 (17), 112 (23), 76 (19). IR  $\nu_{(C=O)}$  1674.3  $\text{cm}^{-1}$ .  $\text{C}_{17}\text{H}_{15}\text{ClN}_2\text{O}_3$  (330.77): calcd. C 61.73, H 4.57, N 8.47; found C 61.27, H 4.61, N 8.42.

### 3.14. Ethyl 7-chloro-2-(4-chlorophenyl)imidazo[1,2-a]pyridine-3-carboxylate (3na)<sup>[6]</sup>

White solid (87%, 58.1 mg), mp 127-129 °C.  $^1\text{H}$  NMR (500 MHz,  $\text{CDCl}_3$ )  $\delta$  9.53 (s, 1H), 7.74 (d,  $J = 7.9$  Hz, 2H), 7.69 (d,  $J = 9.1$  Hz, 1H), 7.44 (d,  $J = 7.6$  Hz, 3H), 4.36 (q,  $J = 7.1$  Hz, 2H), 1.29 (t,  $J = 6.9$  Hz, 3H).  $^{13}\text{C}$  NMR (125 MHz,  $\text{CDCl}_3$ )  $\delta$  160.6, 152.7, 145.4, 135, 132.5, 131.5, 129.4, 127.9, 126.4, 122.6, 117.7, 112.4, 60.9, 14.1. MS (IE)  $m/z$  (relative intensity %) 338 (M+4, 6), 336 (M+2, 31), 334 (M<sup>+</sup>, 47), 307 (9), 305 (14), 291 (9), 289 (14), 266 (11), 264 (66), 262 (100), 226 (18), 191 (10), 112 (17), 76 (10). IR  $\nu_{(C=O)}$  1680.2  $\text{cm}^{-1}$ .

### 3.15. Methyl 2-(*p*-tolyl)imidazo[1,2-a]pyridine-3-carboxylate (3ab)

Yellow solid (91 %, 48.4 mg), mp 123-125 °C.  $^1\text{H}$  NMR (500 MHz,  $\text{CD}_3\text{OD}$ )  $\delta$  9.28 (d,  $J = 7.1$  Hz, 1H), 7.60 (d,  $J = 9.0$  Hz, 1H), 7.53-7.46 (m, 3H), 7.21 (d,  $J = 7.8$  Hz, 2H), 7.06 (t,  $J = 7.1$  Hz, 1H), 3.72 (s, 3H), 2.37 (s, 3H).  $^{13}\text{C}$  NMR (125 MHz,  $\text{CD}_3\text{OD}$ )  $\delta$  161.1, 152.7, 146.7, 138.7, 130.8, 129.7, 128.8, 128.1, 128, 116.0, 114.4, 111.5, 50.3, 20. MS (IE)  $m/z$  (relative intensity %) 266 (M<sup>+</sup>, 100), 251 (56), 235 (28), 208 (75), 192 (16), 78 (17). IR  $\nu_{(C=O)}$  1685.3  $\text{cm}^{-1}$ .  $\text{C}_{16}\text{H}_{14}\text{N}_2\text{O}_2$  (266.29): calcd. C 72.16, H 5.30, N 10.52; found C 72.39, H 5.34, N 10.58.

### 3.16. Propyl 2-(*p*-tolyl)imidazo[1,2-a]pyridine-3-carboxylate (3ac)

Yellow oil (83 %, 48.8 mg).  $^1\text{H}$  NMR (500 MHz,  $\text{CDCl}_3$ )  $\delta$  9.40 (d,  $J = 7.3$  Hz, 1H), 7.74 (d,  $J = 8.9$  Hz, 1H), 7.63 (d,  $J = 8.2$  Hz, 2H), 7.42 (t,  $J = 7.8$  Hz, 1H), 7.23 (d,  $J = 7.7$  Hz, 2H), 7.02 (t,  $J = 6.9$  Hz, 1H), 4.20 (t,  $J = 6.6$  Hz, 2H), 2.40 (s, 3H), 1.60 (h,  $J = 7.5$  Hz, 2H), 0.79 (t,  $J = 7.4$  Hz, 3H).  $^{13}\text{C}$  NMR (125 MHz,  $\text{CDCl}_3$ )  $\delta$  161.3, 153.5, 146.9, 138.6, 131.3, 130, 128.3, 128.3, 128.1, 117.2, 114.1, 111.9, 66.2, 21.8, 21.4, 10.4. MS (IE)  $m/z$  (relative intensity %) 294 (M<sup>+</sup>, 40), 251 (11), 208 (100), 110 (47), 78 (14). IR  $\nu_{(C=O)}$  1683.2  $\text{cm}^{-1}$ .  $\text{C}_{18}\text{H}_{18}\text{N}_2\text{O}_2$  (294.35): calcd. C 73.45, H 6.16, N 9.52; found C 73.26, H 6.13, N 9.45.

### 3.17. Phenethyl 2-(*p*-tolyl)imidazo[1,2-a]pyridine-3-carboxylate (3ad)

Pale yellow solid (87 %, 62 mg), mp 87-89 °C.  $^1\text{H}$  NMR (500 MHz,  $\text{CDCl}_3$ )  $\delta$  9.33 (d,  $J = 7.0$  Hz, 1H), 7.74 (d,  $J = 9.0$  Hz, 1H), 7.68 (d,  $J = 7.8$  Hz, 2H), 7.42 (t,  $J = 7.9$  Hz, 1H), 7.30-7.20 (m, 5H), 7.06 (d,  $J = 6.7$  Hz, 2H), 6.98 (t,  $J = 7.0$  Hz, 1H), 4.53 (t,  $J = 6.9$  Hz, 2H), 2.96 (t,  $J = 6.9$  Hz, 2H), 2.45 (s, 3H).  $^{13}\text{C}$  NMR (125 MHz,  $\text{CDCl}_3$ )  $\delta$  161.1, 154, 147.2, 138.7, 137.8, 131.6, 130.2, 128.9, 128.5, 128.4, 127.9, 126.5, 117.4, 114, 111.7, 65.1, 34.9, 21.5. MS (IE)  $m/z$  (relative intensity %) 356 (M<sup>+</sup>, 88), 252 (54), 235 (33), 208 (100), 104 (20), 78 (17). IR  $\nu_{(C=O)}$  1678.2  $\text{cm}^{-1}$ .  $\text{C}_{23}\text{H}_{20}\text{N}_2\text{O}_2$  (356.42): calcd. C 77.51, H 5.66, N 7.86; found C 77.84, H 5.71, N 7.81.

### 3.18. Isopentyl 2-(*p*-tolyl)imidazo[1,2-a]pyridine-3-carboxylate (3ae)

Pale yellow solid (76%, 49 mg), mp. 77-79 °C.  $^1\text{H}$  NMR (500 MHz,  $\text{CDCl}_3$ )  $\delta$  9.41 (d,  $J = 7.0$  Hz, 1H), 7.71 (d,  $J = 8.9$  Hz, 1H), 7.63 (d,  $J = 7.8$  Hz, 2H), 7.40 (t,  $J = 7.9$  Hz, 1H), 7.23 (d,  $J = 7.8$  Hz, 2H), 7.00 (t,  $J = 7.0$  Hz, 1H), 4.27 (t,  $J = 6.5$  Hz, 2H), 2.41 (s, 3H), 1.50-1.36 (m, 3H), 0.82 (d,  $J = 6.4$  Hz, 6H).  $^{13}\text{C}$  NMR (125 MHz,  $\text{CDCl}_3$ )  $\delta$  161.3, 153.9, 147.1, 138.4, 131.7, 130, 128.3, 128.3, 127.8, 117.4, 113.9, 111.9, 62.9, 37.1, 24.7, 22.3, 21.4. MS (IE)  $m/z$  (relative intensity %) 322 (M<sup>+</sup>, 83), 252 (40), 235 (27), 208 (100), 192 (23), 119 (38), 91 (20), 78 (22). IR  $\nu_{(C=O)}$  1674.4  $\text{cm}^{-1}$ .  $\text{C}_{20}\text{H}_{22}\text{N}_2\text{O}_2$  (322.40): calcd. C 74.51, H 6.88, N 8.69; found C 74.79, H 6.84, N 8.65.

### 3.19. 3-cyclohexylpropyl 2-(*p*-tolyl)imidazo[1,2-a]pyridine-3-carboxylate (3af)

Colorless oil (83%, 62.4 mg).  $^1\text{H}$  NMR (500 MHz,  $\text{CDCl}_3$ )  $\delta$  9.43 (d,  $J = 7.0$  Hz, 1H), 7.73 (d,  $J = 8.8$  Hz, 1H), 7.65 (d,  $J = 7.6$  Hz, 2H), 7.41 (dd,  $J = 8.9, 6.9$  Hz, 1H), 7.25 (d,  $J = 7.8$  Hz, 2H), 7.01 (t,  $J = 6.9$  Hz, 1H), 4.23 (t,  $J = 6.4$  Hz, 2H), 2.42 (s, 3H), 1.70-1.56 (m, 8H), 1.22-1.08 (m, 4H), 1.06-0.99 (m, 2H), 0.84-0.77 (m, 2H).  $^{13}\text{C}$  NMR (125 MHz,  $\text{CDCl}_3$ )  $\delta$  161.4, 153.8, 147.1, 138.4, 131.7, 130, 128.3, 127.8, 117.4, 113.9, 111.9, 65, 37.3, 33.6, 33.2, 26.6, 26.3, 25.9, 21.4. MS (IE)  $m/z$  (relative intensity %) 376 (M<sup>+</sup>, 31), 252 (22), 208 (100), 80 (29). IR  $\nu_{(C=O)}$  1681.2  $\text{cm}^{-1}$ .  $\text{C}_{24}\text{H}_{28}\text{N}_2\text{O}_2$  (376.49): calcd. C 76.56, H 7.50, N 7.44; found C 76.87, H 7.57, N 7.52.

### 3.20. Isopropyl 2-(*p*-tolyl)imidazo[1,2-a]pyridine-3-carboxylate (3ag)

Yellow oil (69%, 40.5 mg).  $^1\text{H}$  NMR (500 MHz,  $\text{CD}_3\text{OD}$ )  $\delta$  9.38 (d,  $J = 7.0$  Hz, 1H), 7.64 (d,  $J = 9.0$  Hz, 1H), 7.57 - 7.49 (m, 3H), 7.24 (d,  $J = 7.8$  Hz, 2H), 7.12 (t,  $J = 6.9$  Hz, 1H), 5.16 (hept,  $J = 6.4$  Hz, 1H), 2.40 (s, 3H), 1.17 (d,  $J = 6.3$  Hz, 6H).  $^{13}\text{C}$  NMR (125 MHz,  $\text{CD}_3\text{OD}$ )  $\delta$  158.8, 151.1, 145, 137.1, 129.5, 128.4, 127.2, 126.5, 126.3, 114.5, 112.8, 110.5, 66.8, 19.1, 19.1, 18.5. MS (IE)  $m/z$  (relative intensity %) 294 (M<sup>+</sup>, 81), 252 (28), 235 (30), 208 (100), 43 (9.2). IR  $\nu_{(C=O)}$  1679.4  $\text{cm}^{-1}$ .  $\text{C}_{18}\text{H}_{18}\text{N}_2\text{O}_2$  (294.35): calcd. C 73.45, H 6.16, N 9.52; found C 73.68, H 5.21, N 9.55.

### 3.21. Cyclopentyl 2-(*p*-tolyl)imidazo[1,2-a]pyridine-3-carboxylate (3ah)

Pale yellow solid (71 %, 45.4 mg), mp 90-92 °C. <sup>1</sup>H NMR (500 MHz, CDCl<sub>3</sub>) δ 9.44 (d, *J* = 7.0 Hz, 1H), 7.73 (d, *J* = 9.0 Hz, 1H), 7.64 (d, *J* = 7.8 Hz, 2H), 7.42 (t, *J* = 7.9 Hz, 1H), 7.24 (d, *J* = 7.8 Hz, 2H), 7.02 (t, *J* = 6.9 Hz, 1H), 5.41 (tt, *J* = 5.7, 2.7 Hz, 1H), 2.43 (s, 3H), 1.88–1.79 (m, 2H), 1.73–1.65 (m, 2H), 1.57–1.48 (m, 4H). <sup>13</sup>C NMR (125 MHz, CDCl<sub>3</sub>) δ 161, 153.7, 147, 138.4, 131.8, 130, 128.3, 128.2, 127.7, 117.4, 113.9, 112.2, 77.6, 32.6, 23.5, 21.4. MS (IE) *m/z* (relative intensity %) 320 (M<sup>+</sup>, 86), 252 (71), 235 (22), 208 (100), 192 (28), 78 (20). IR ν<sub>(C=O)</sub> 1676.7 cm<sup>-1</sup>. C<sub>20</sub>H<sub>20</sub>N<sub>2</sub>O<sub>2</sub> (320.39): calcd. C 74.98, H 6.29, N 8.74; found C 74.63, H 6.22, N 8.82.

### 3.22. Cyclohexyl 2-(*p*-tolyl)imidazo[1,2-*a*]pyridine-3-carboxylate (3ai)<sup>[7]</sup>

White solid (65 %, 43.4 mg), mp 105-107 °C. <sup>1</sup>H NMR (500 MHz, CDCl<sub>3</sub>) δ 9.42 (d, *J* = 7.0 Hz, 1H), 7.72 (d, *J* = 9.0 Hz, 1H), 7.66 (d, *J* = 7.8 Hz, 2H), 7.41 (t, *J* = 7.8 Hz, 1H), 7.24 (d, *J* = 7.7 Hz, 2H), 7.01 (t, *J* = 6.9 Hz, 1H), 5.02 (tt, *J* = 8.7, 3.9 Hz, 1H), 2.42 (s, 3H), 1.89–1.83 (m, 2H), 1.62–1.51 (m, 2H), 1.44–1.28 (m, 6H). <sup>13</sup>C NMR (125 MHz, CDCl<sub>3</sub>) δ 160.8, 153.7, 147, 138.4, 131.7, 130.1, 128.4, 128.3, 127.7, 117.4, 113.9, 112.2, 73.2, 31.5, 25.3, 23.5, 21.4. MS (IE) *m/z* (relative intensity %) 334 (M<sup>+</sup>, 83), 252 (98), 208 (100), 115 (55), 78 (43). IR ν<sub>(C=O)</sub> 1673.8 cm<sup>-1</sup>

### 3.23. Pentan-2-yl 2-(*p*-tolyl)imidazo[1,2-*a*]pyridine-3-carboxylate (3aj)

Yellow oil (60 %, 38.6 mg). <sup>1</sup>H NMR (500 MHz, CDCl<sub>3</sub>) δ 9.43 (d, *J* = 7.0 Hz, 1H), 7.73 (d, *J* = 8.9 Hz, 1H), 7.65 (d, *J* = 7.8 Hz, 2H), 7.41 (t, *J* = 7.8 Hz, 1H), 7.24 (d, *J* = 7.7 Hz, 2H), 7.02 (t, *J* = 6.8 Hz, 1H), 5.14 (q, *J* = 6.3 Hz, 1H), 2.43 (s, 3H), 1.55 – 1.48 (m, 1H), 1.46 – 1.38 (m, 1H), 1.25 (d, *J* = 6.3 Hz, 3H), 1.23 – 1.14 (m, 2H), 0.84 (t, *J* = 7.4 Hz, 3H). <sup>13</sup>C NMR (125 MHz, CDCl<sub>3</sub>) δ 160.9, 153.8, 147, 138.3, 131.7, 130.1, 128.3, 128.1, 127.7, 117.4, 113.8, 112.2, 71.4, 38, 21.4, 19.9, 18.5, 13.9. MS (IE) *m/z* (relative intensity %) 322 (M<sup>+</sup>, 93), 308 (35), 252 (98), 235(36), 208 (100), 192 (43), 78 (30). IR ν<sub>(C=O)</sub> 1677.9 cm<sup>-1</sup>. C<sub>20</sub>H<sub>22</sub>N<sub>2</sub>O<sub>2</sub> (322.40): calcd. C 74.51, H 6.88, N 8.69; found C 74.28, H 6.95, N 8.62.

### 3.24. *tert*-butyl 2-(*p*-tolyl)imidazo[1,2-*a*]pyridine-3-carboxylate (3ak)

Yellow solid (57 %, 35.1 mg), mp 83-85 °C. <sup>1</sup>H NMR (500 MHz, CDCl<sub>3</sub>) δ 9.35 (d, *J* = 7.0 Hz, 1H), 7.66 (d, *J* = 8.9 Hz, 1H), 7.61 (d, *J* = 8.0 Hz, 2H), 7.32 (dd, *J* = 8.8, 7.0 Hz, 1H), 7.20 (d, *J* = 7.8 Hz, 2H), 6.92 (t, *J* = 7.1 Hz, 1H), 2.37 (s, 3H), 1.43 (s, 9 H). <sup>13</sup>C NMR (125 MHz, CDCl<sub>3</sub>) δ 160.6, 153.2, 146.7, 138.2, 131.9, 130.1, 128.2, 127.4, 117.3, 113.6, 112.9, 81.8, 28.3, 21.4. MS (IE) *m/z* (relative intensity %) 308 (M<sup>+</sup>, 18), 252 (49), 208 (100), 192 (20), 119 (22), 57 (35). IR ν<sub>(C=O)</sub> 1679 cm<sup>-1</sup>. C<sub>19</sub>H<sub>20</sub>N<sub>2</sub>O<sub>2</sub> (308.37): calcd. C 74.00, H 6.54, N 9.08; found C 74.29, H 6.59, N 9.14.

## 4. References

- [1] S. Jin, B. Xie, S. Lin, C. Min, R. Deng, Z. Yan, *Org. Lett.* **2019**, 21, 3436–3440.
- [2] S. Park, H. Kim, J.-Y. Son, K. Um, S. Lee, Y. Baek, B. Seo, P. H. Lee, *J. Org. Chem.* **2017**, 82, 10209–10218.
- [3] H. Zhu, N. Shao, T. Chen, H. Zou, *Chem. Commun.* **2013**, 49, 7738.
- [4] Basilio-Lopes, A.; Aquino, T. M. de; Mongeot, A.; Bourguignon, J.-J.; Schmitt, M. *Tetrahedron Letters* **2012**, 53, 2583–2587.
- [5] X. Li, *J. Chem. Res. (S)* **2012**, 36, 525–527;
- [6] Trapani, G.; Franco, M.; Ricciardi, L.; Latrofa, A.; Genchi, G.; Sanna, E.; Tuveri, F.; Cagetti, E.; Biggio, G.; Liso, G. *Journal of medicinal chemistry* **1997**, 40, 3109–3118.
- [7] A. V. Gulevich, V. Helan, D. J. Wink, V. Gevorgyan, *Org. Lett.* **2013**, 15, 956–959

## 5. Copies of $^1\text{H}$ and $^{13}\text{C}$ NMR spectra

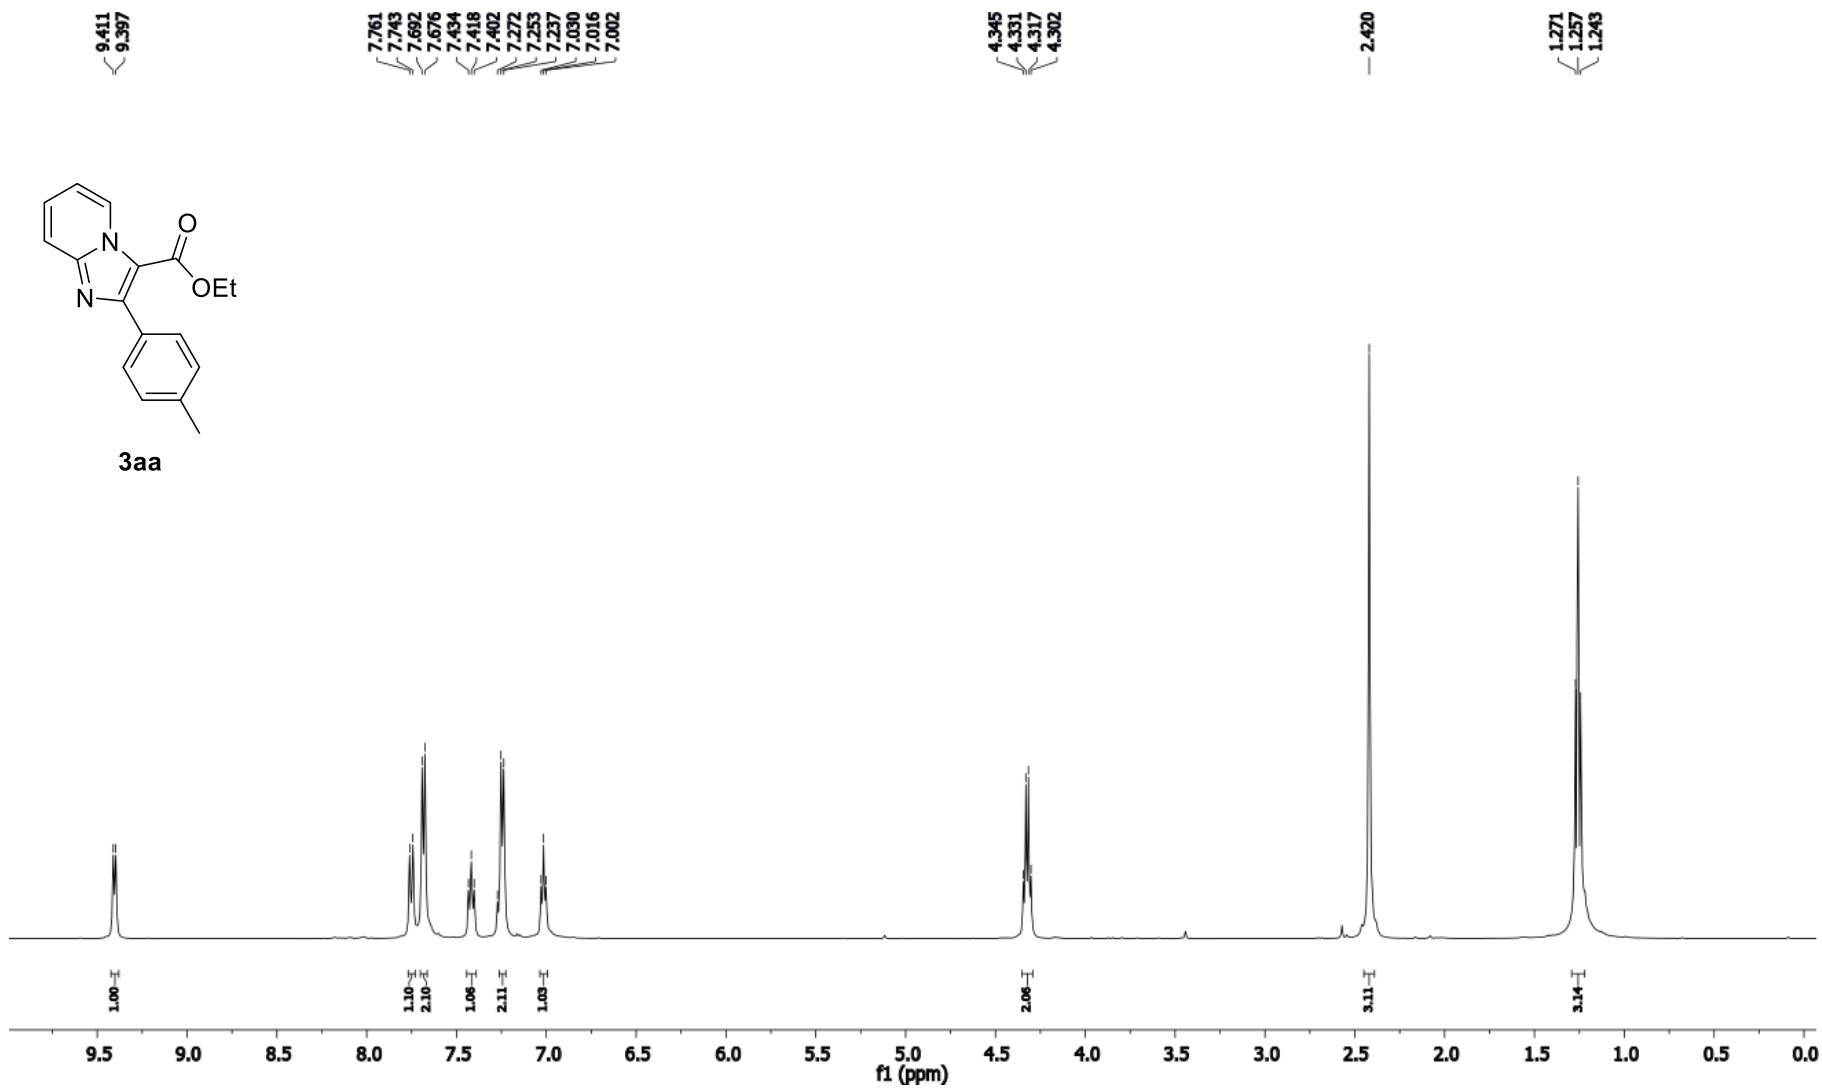

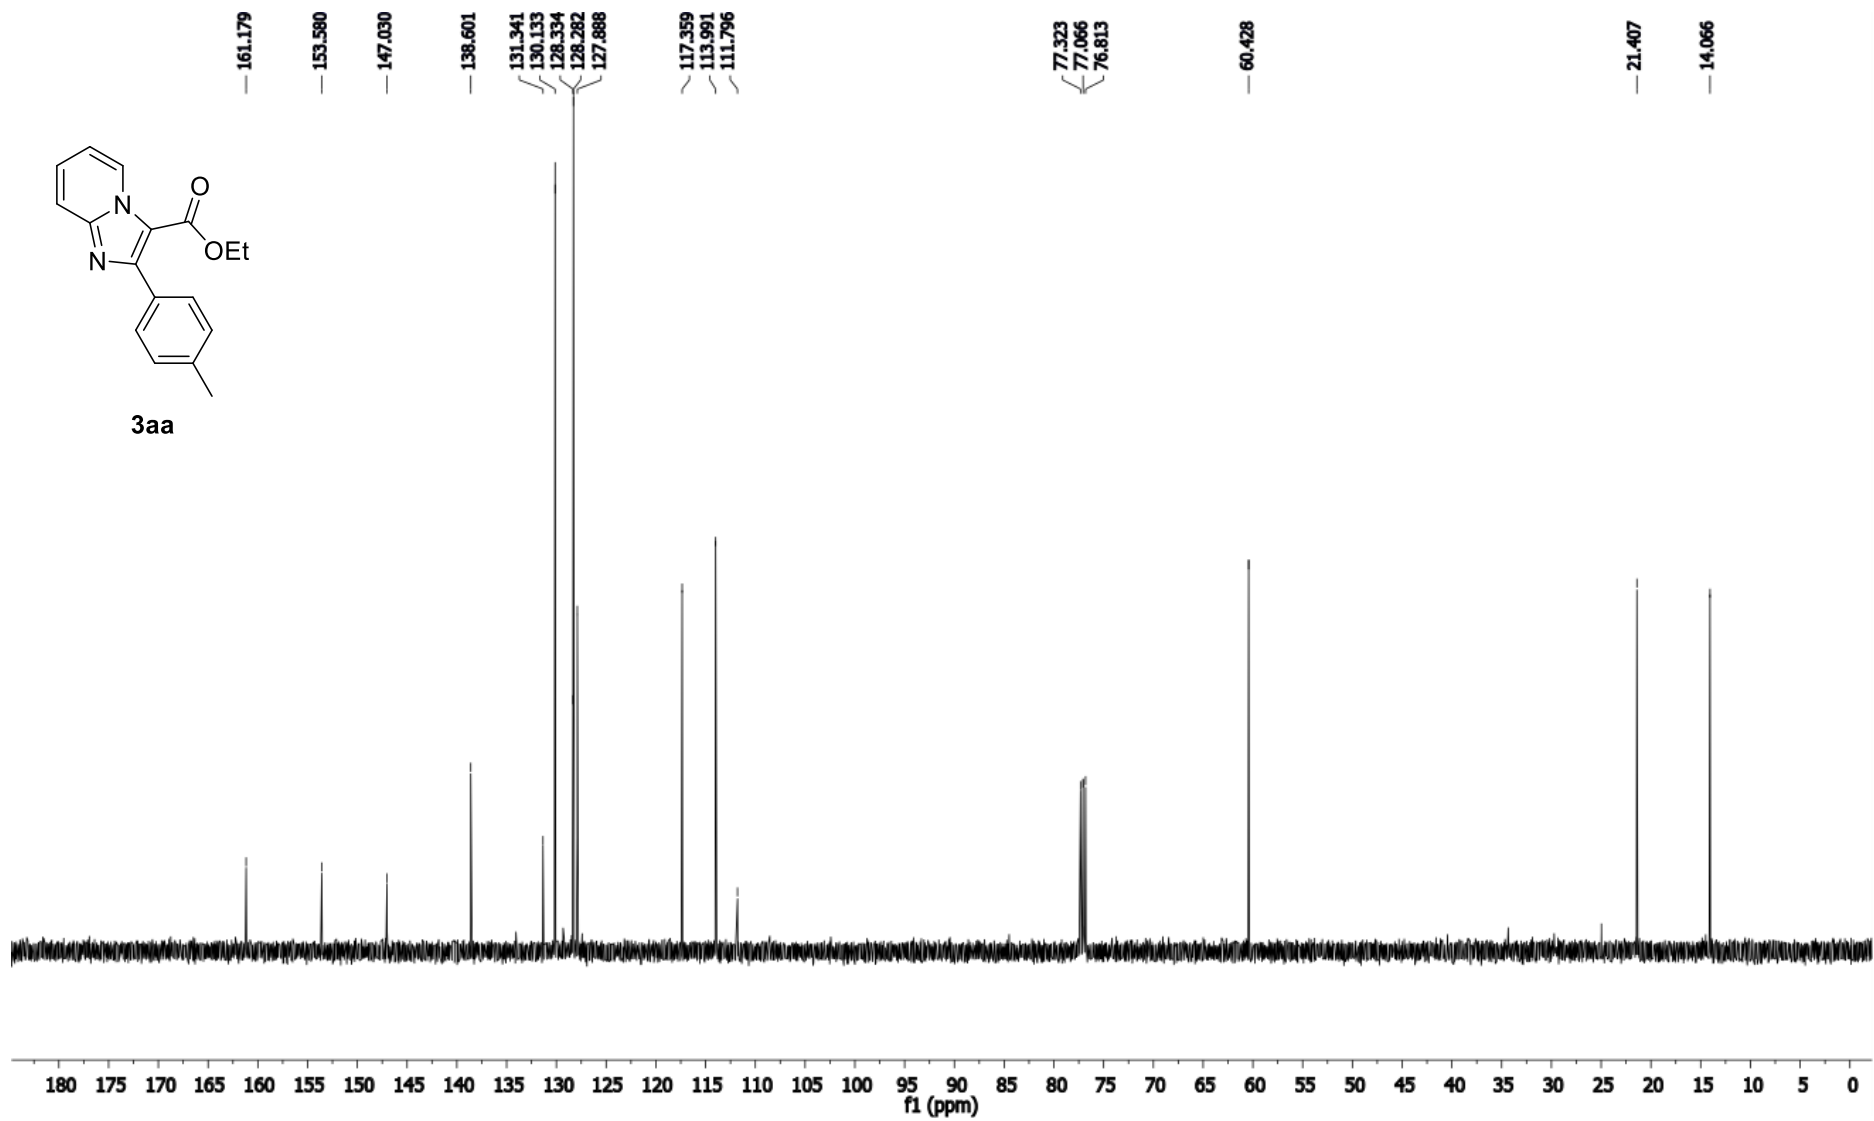

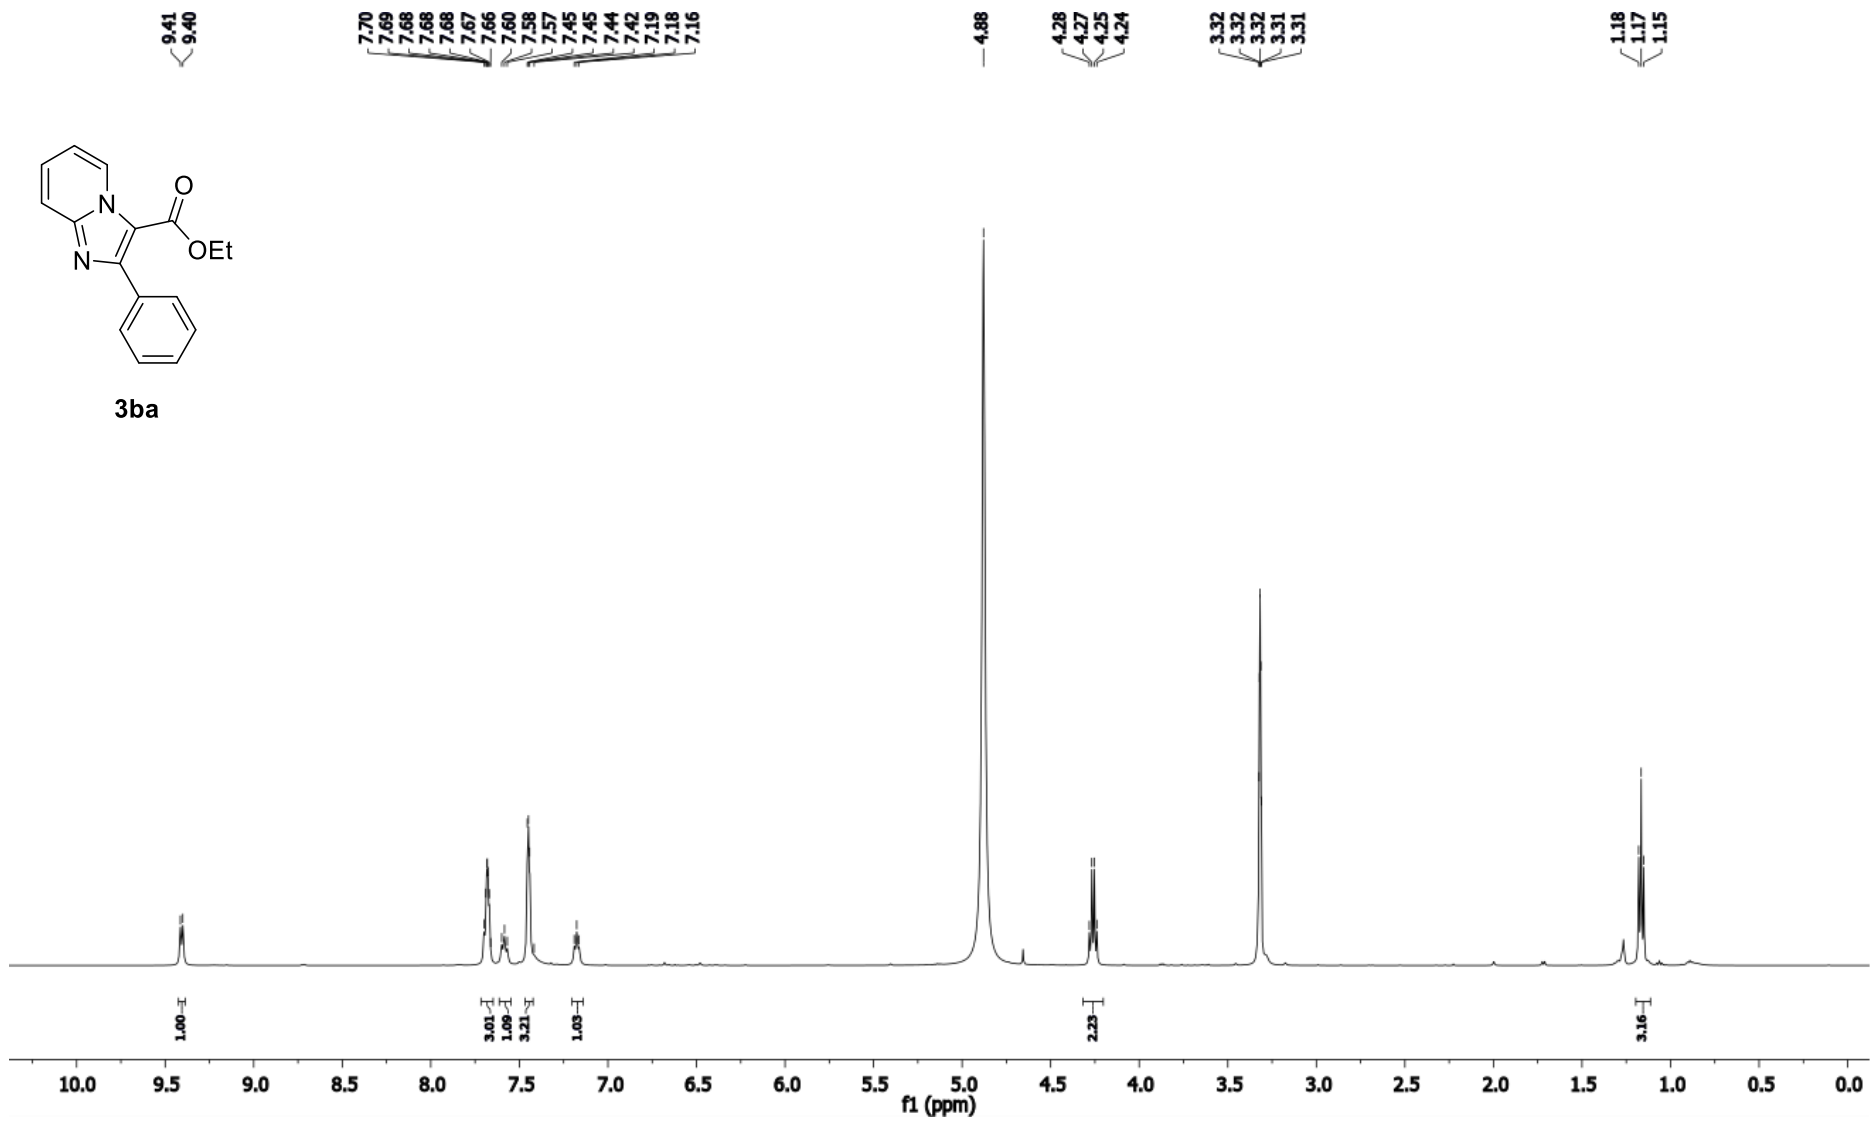



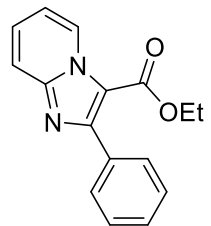

3ba

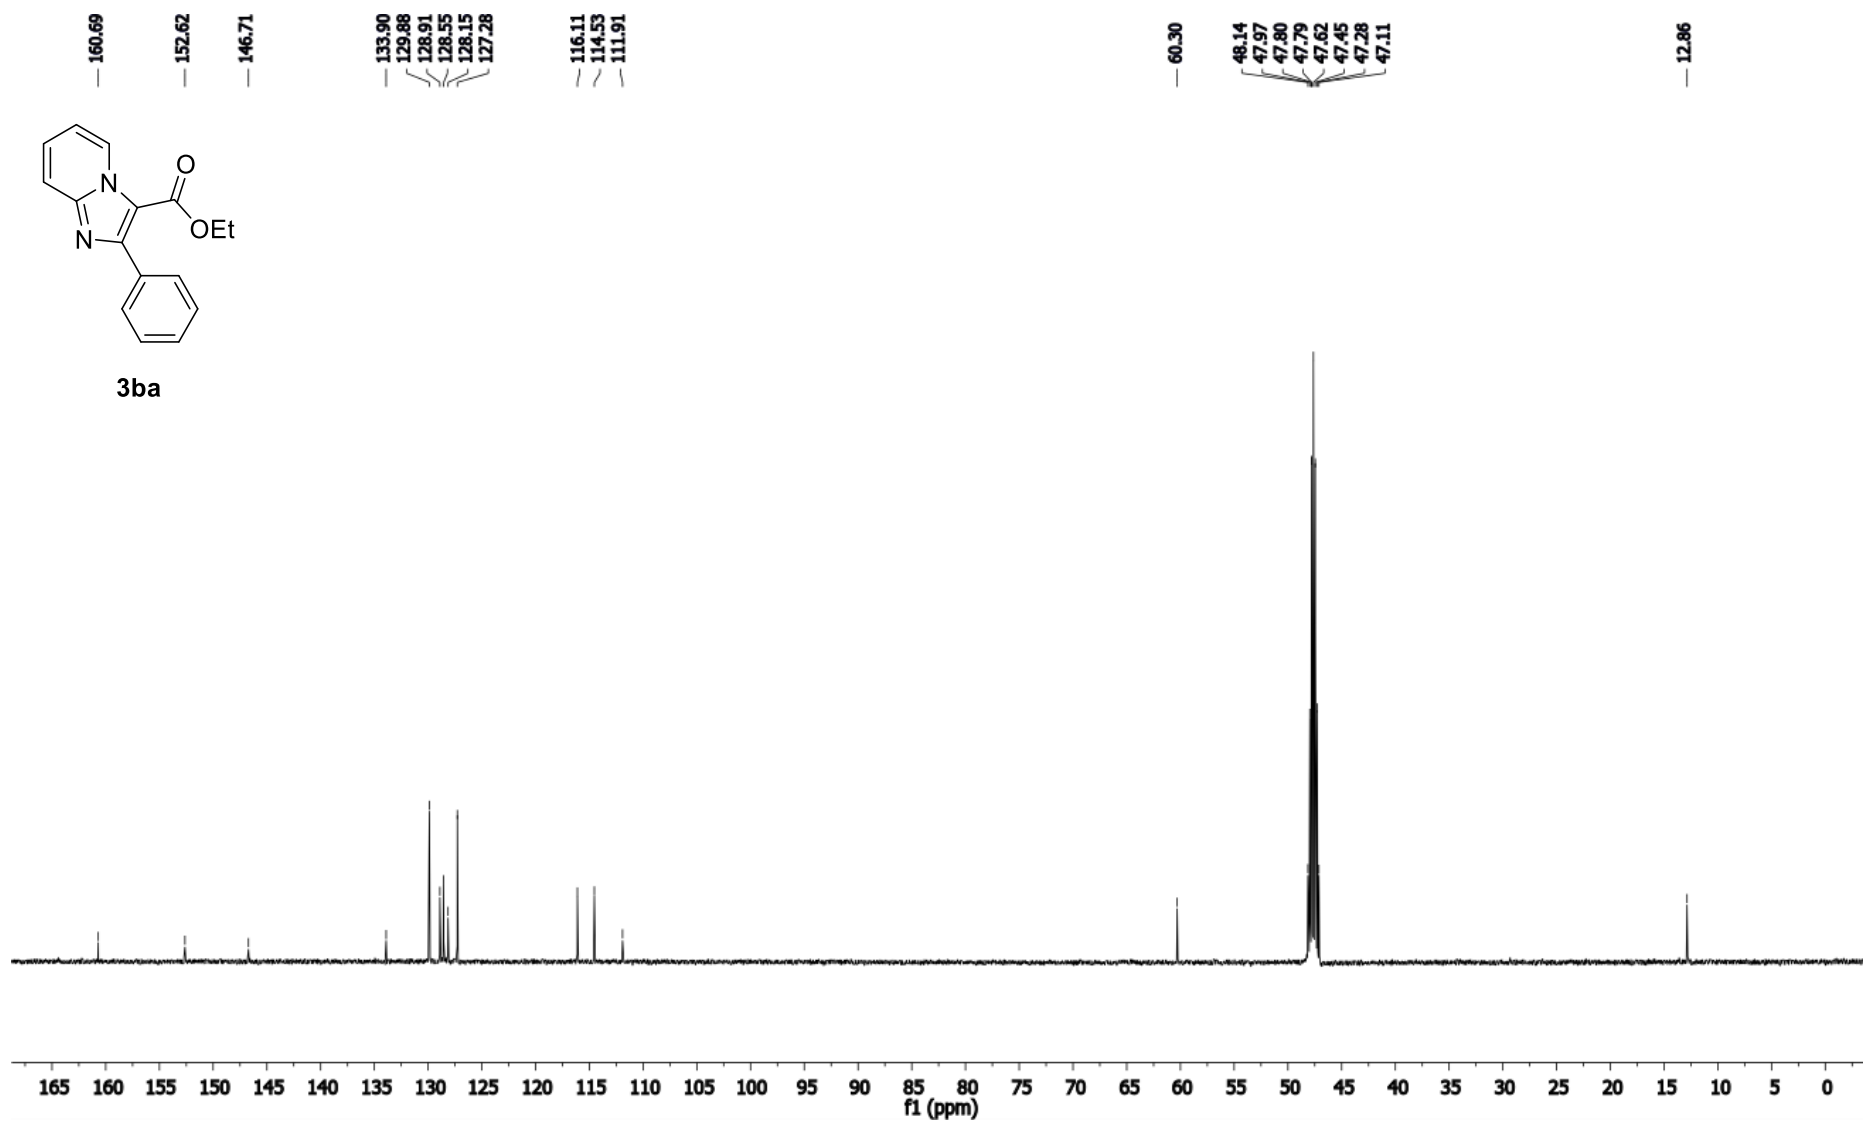

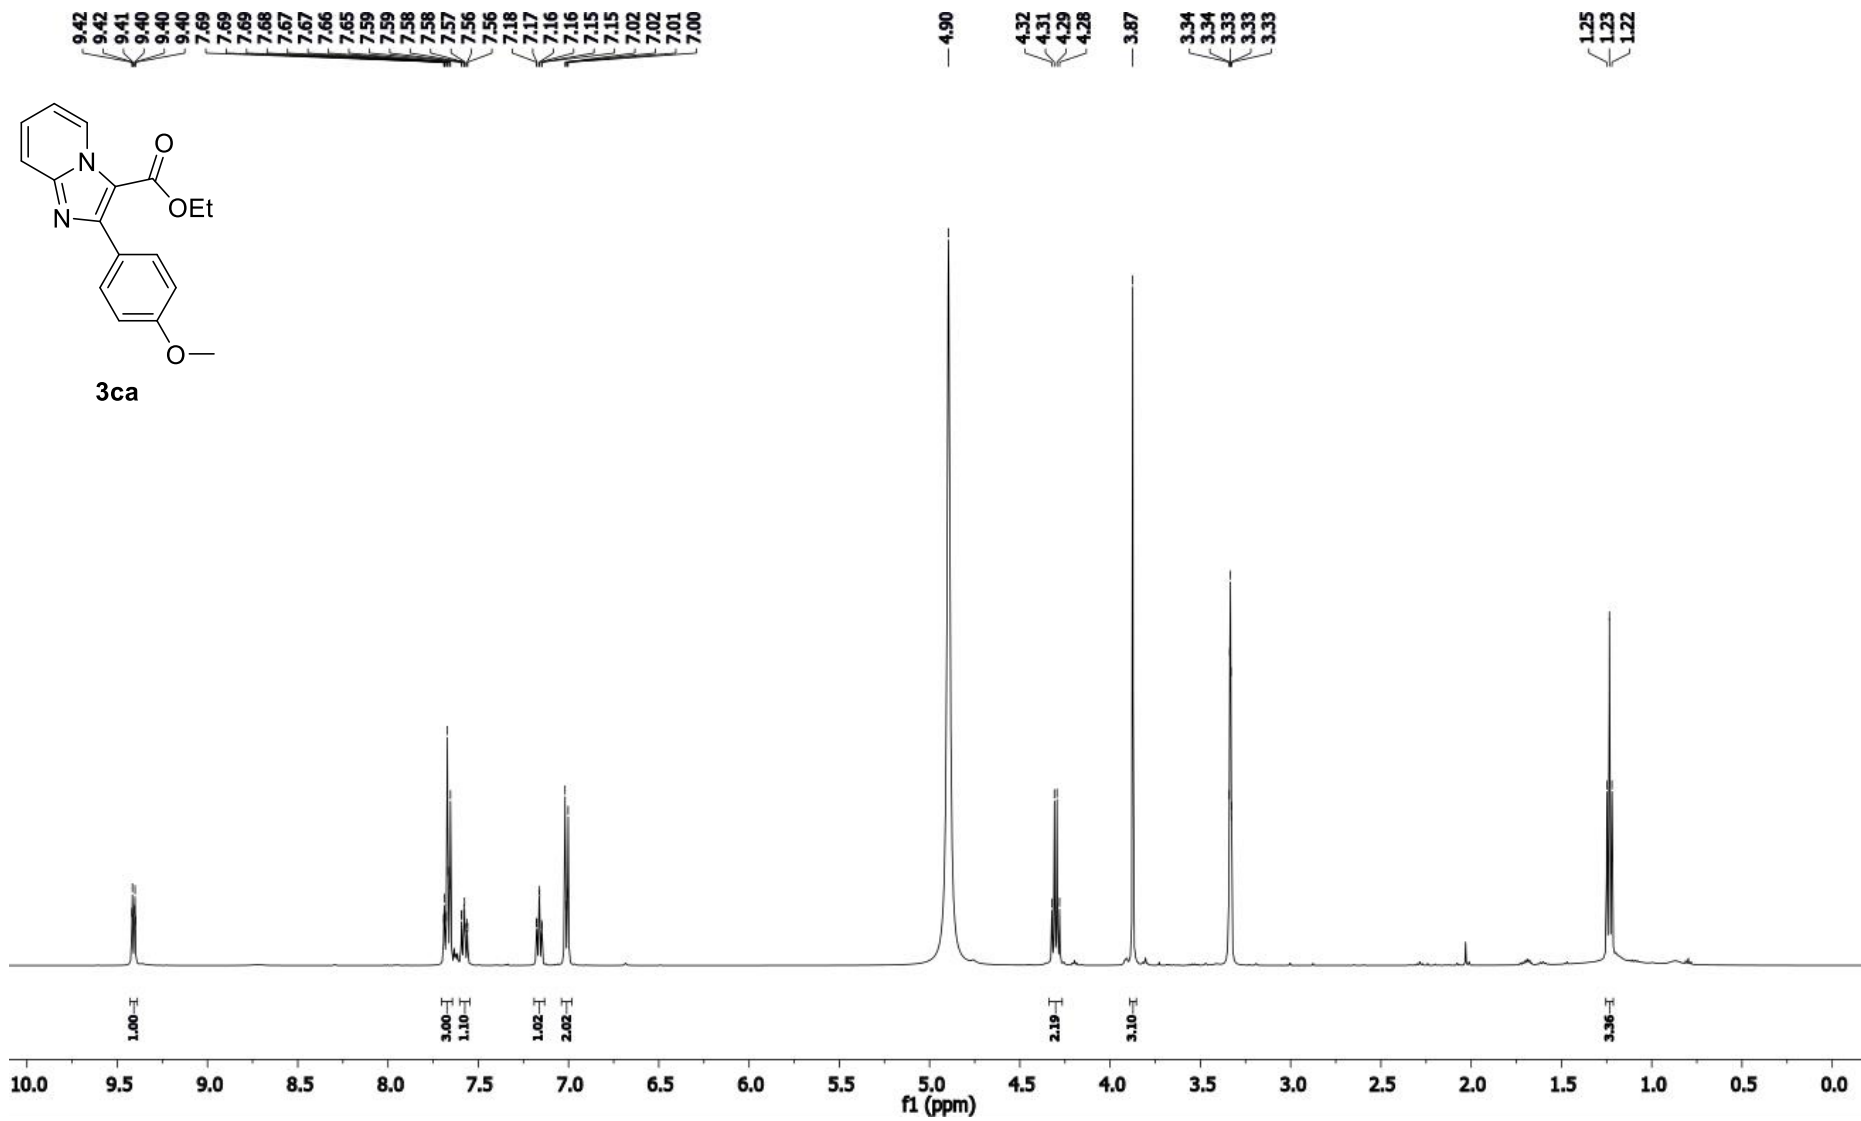

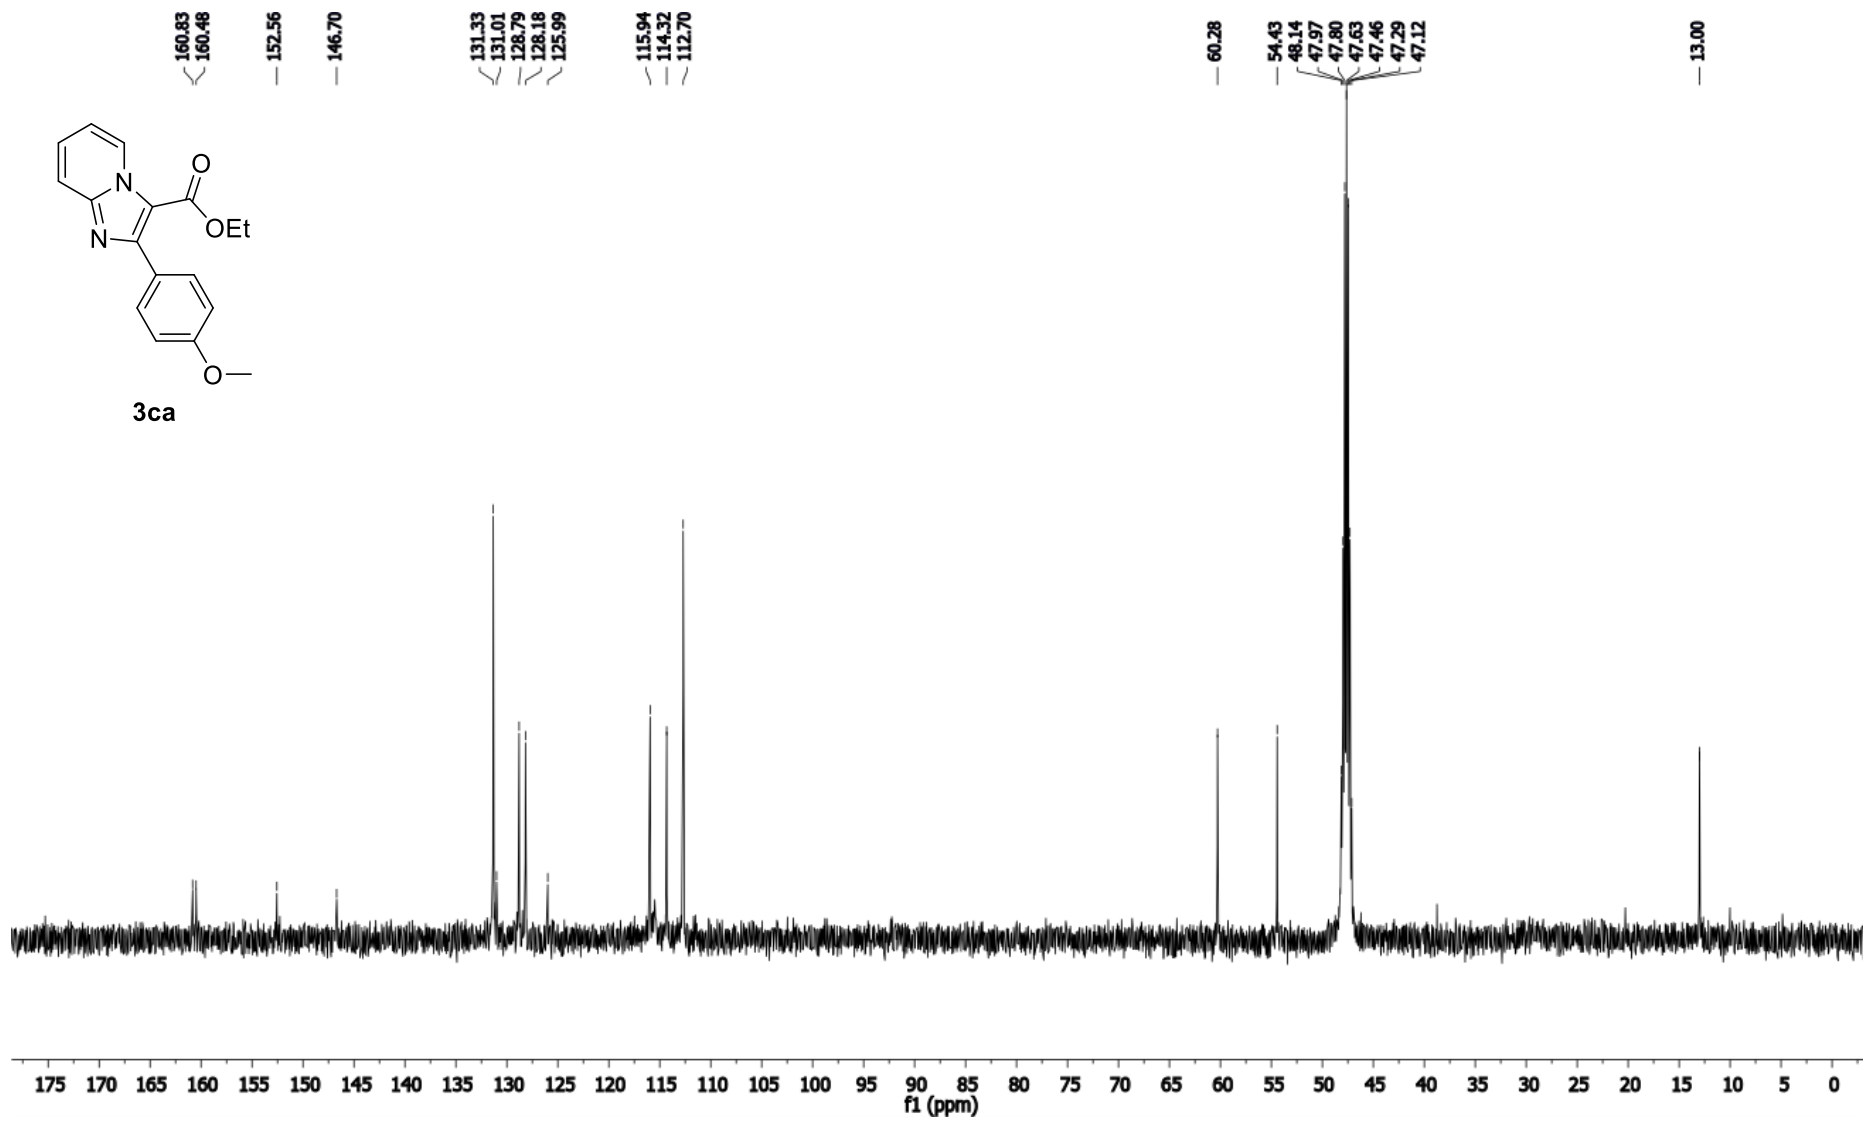

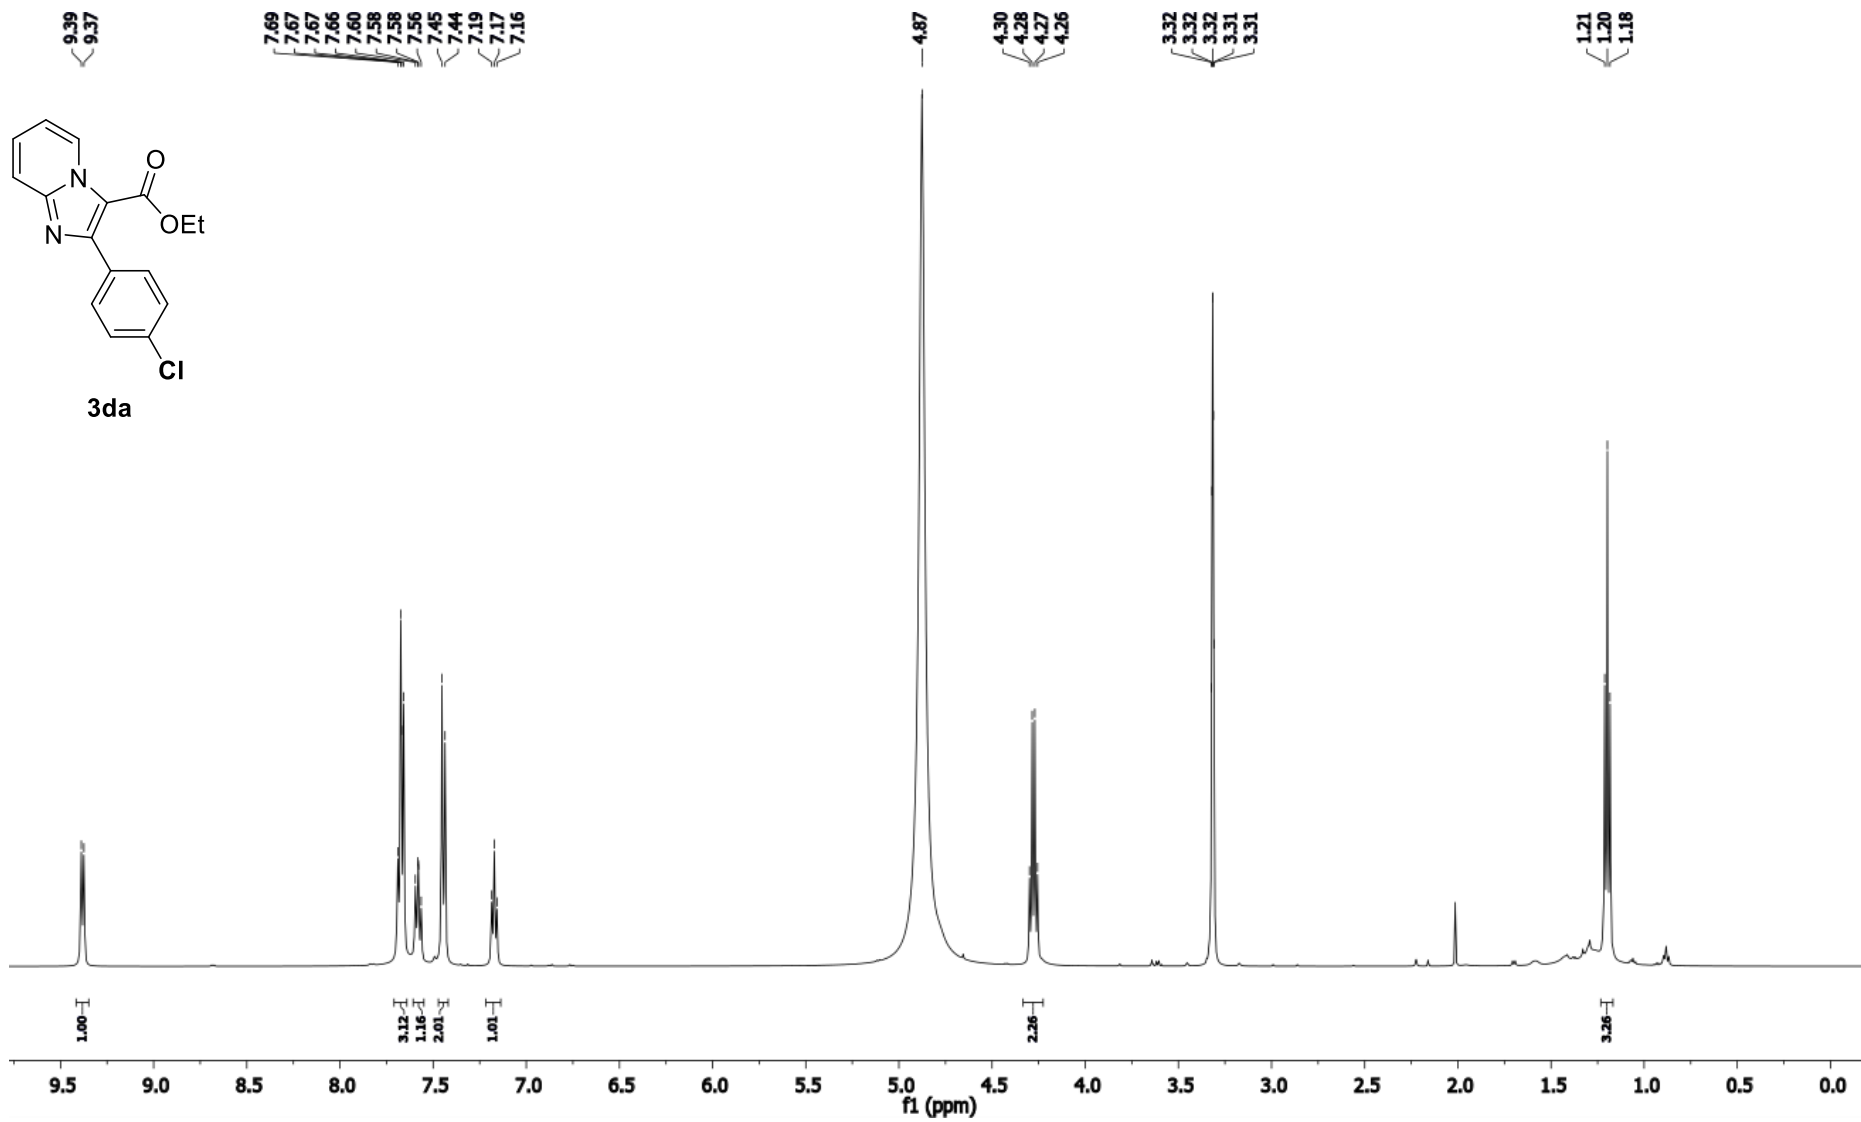

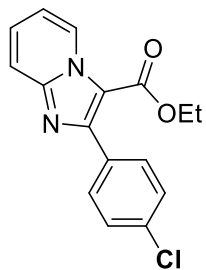

3da

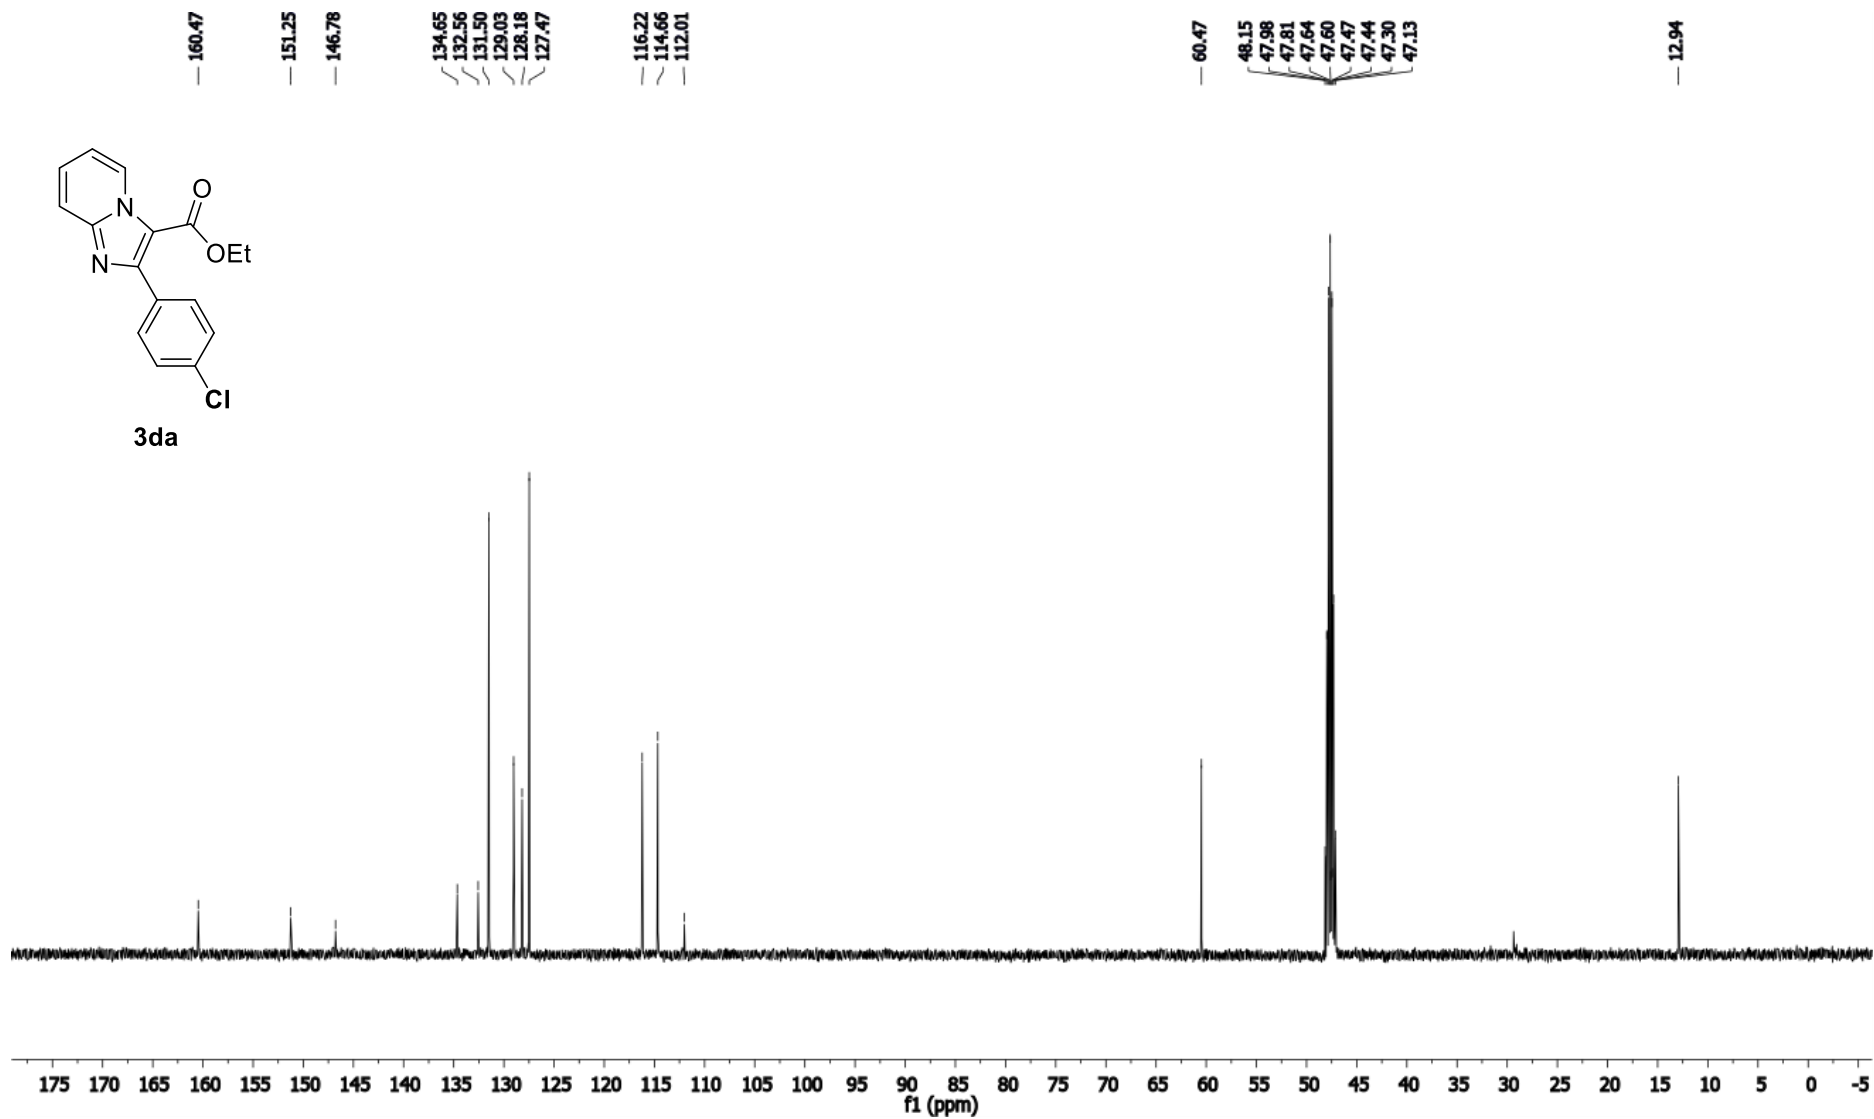

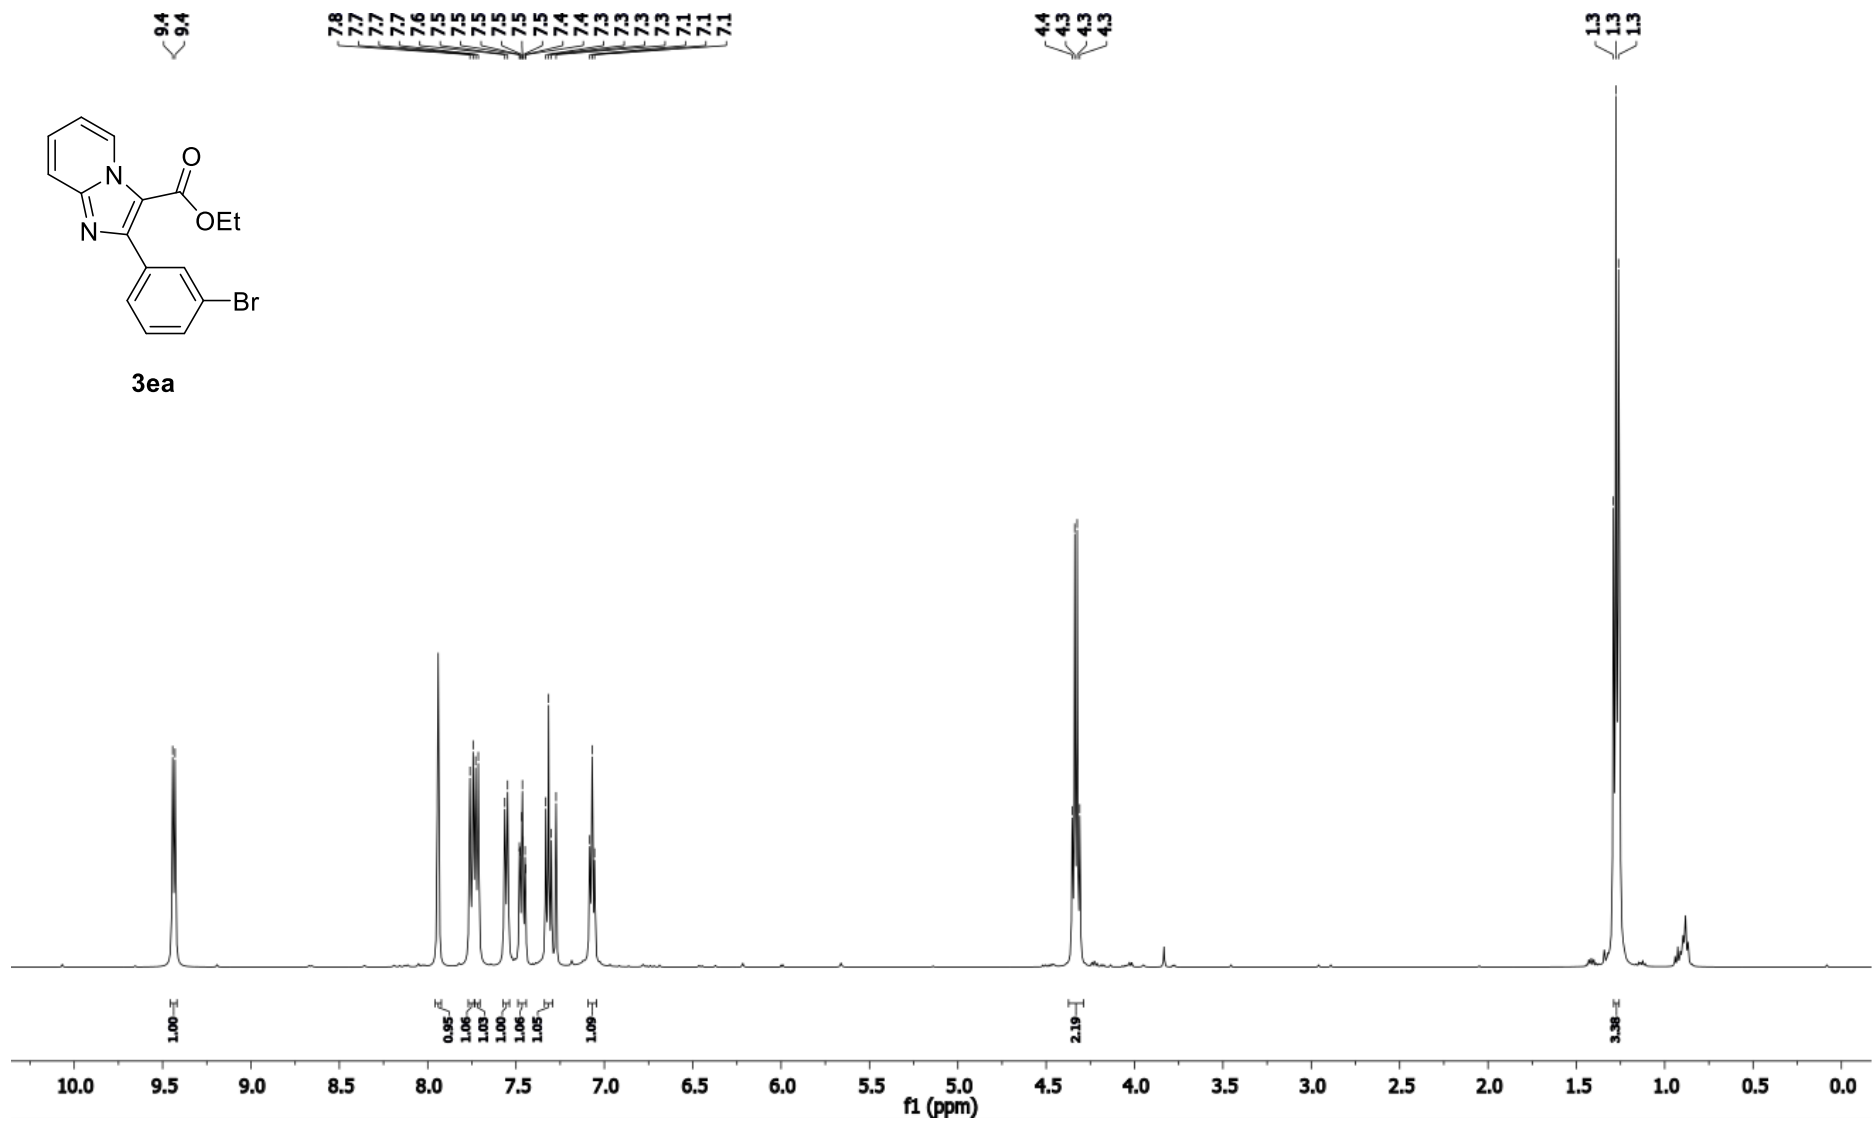

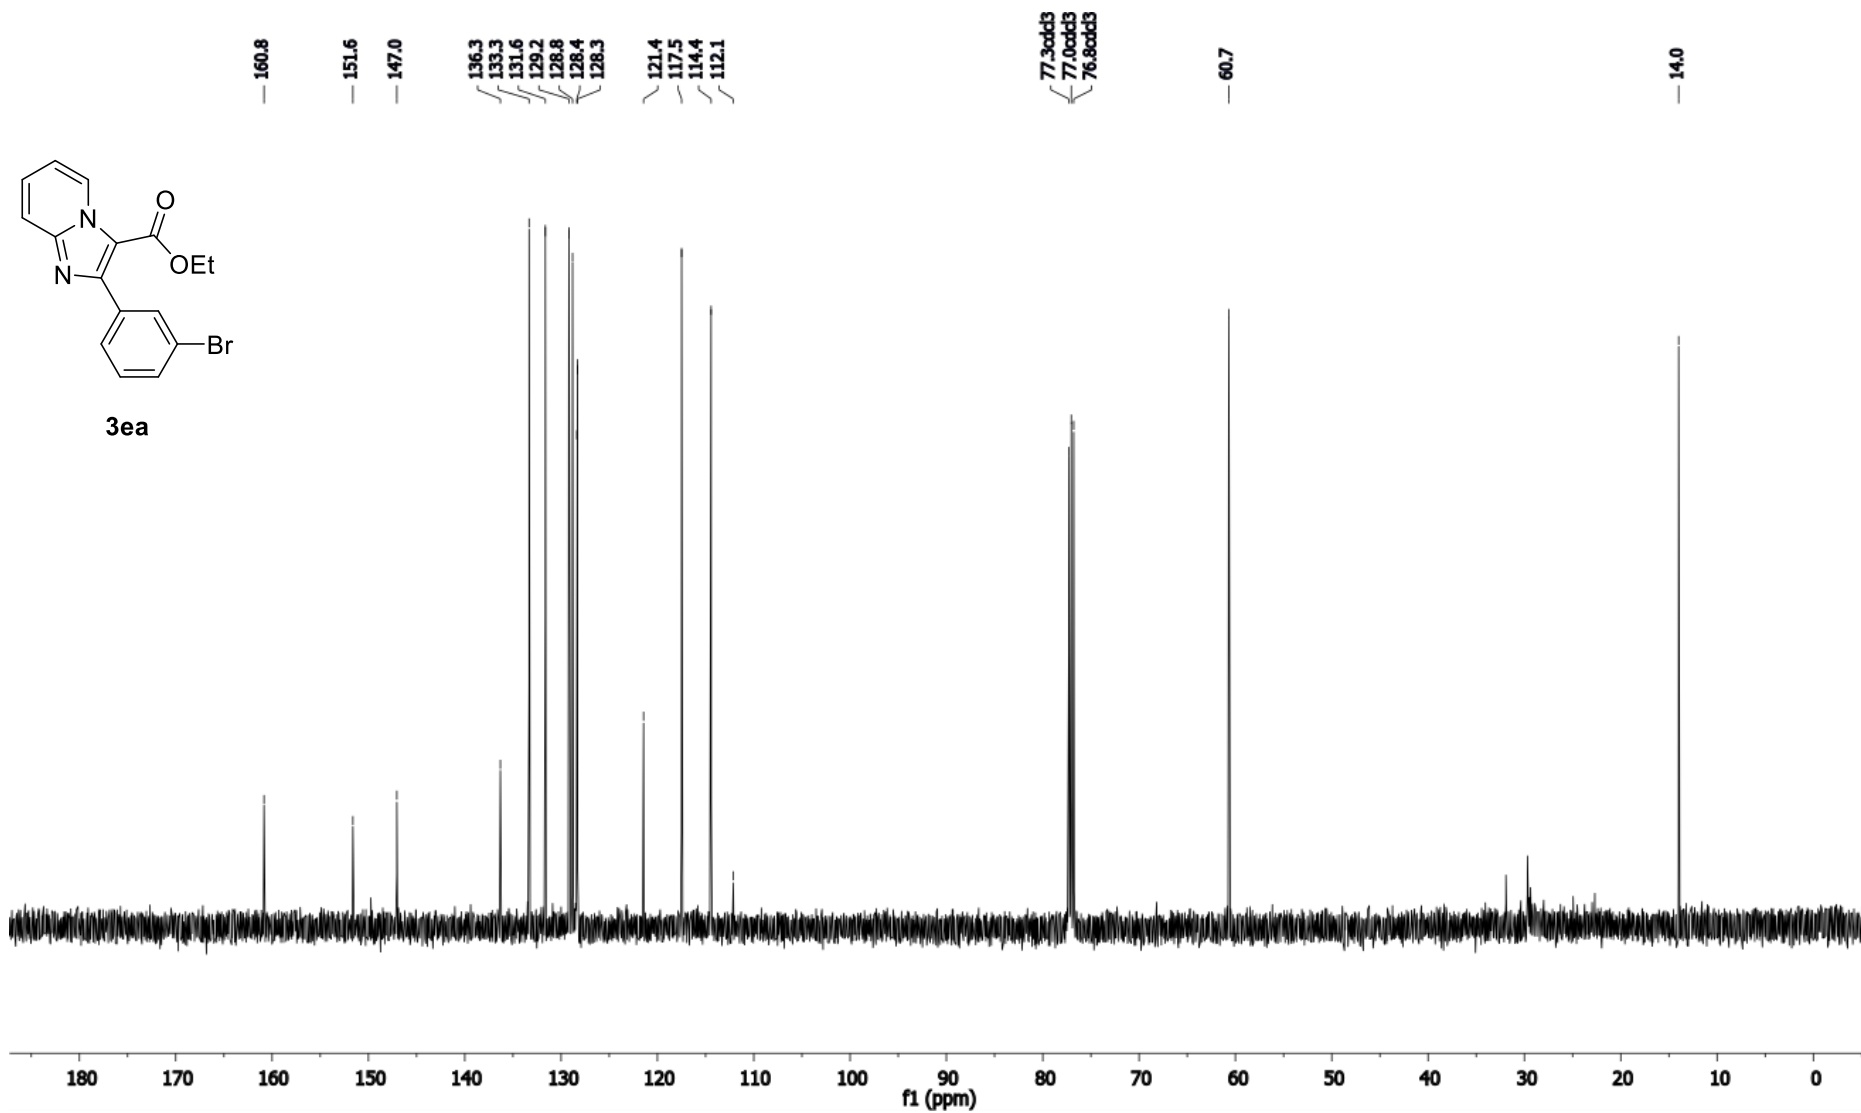

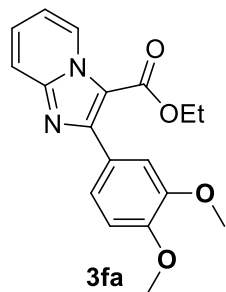

9.39  
9.38

7.72  
7.70  
7.43  
7.42  
7.41  
7.41  
7.40  
7.39  
7.38  
7.37  
7.29  
7.02  
7.01  
6.99  
6.94  
6.92

4.35  
4.34  
4.32  
4.31  
3.94  
3.93

1.28  
1.26  
1.25

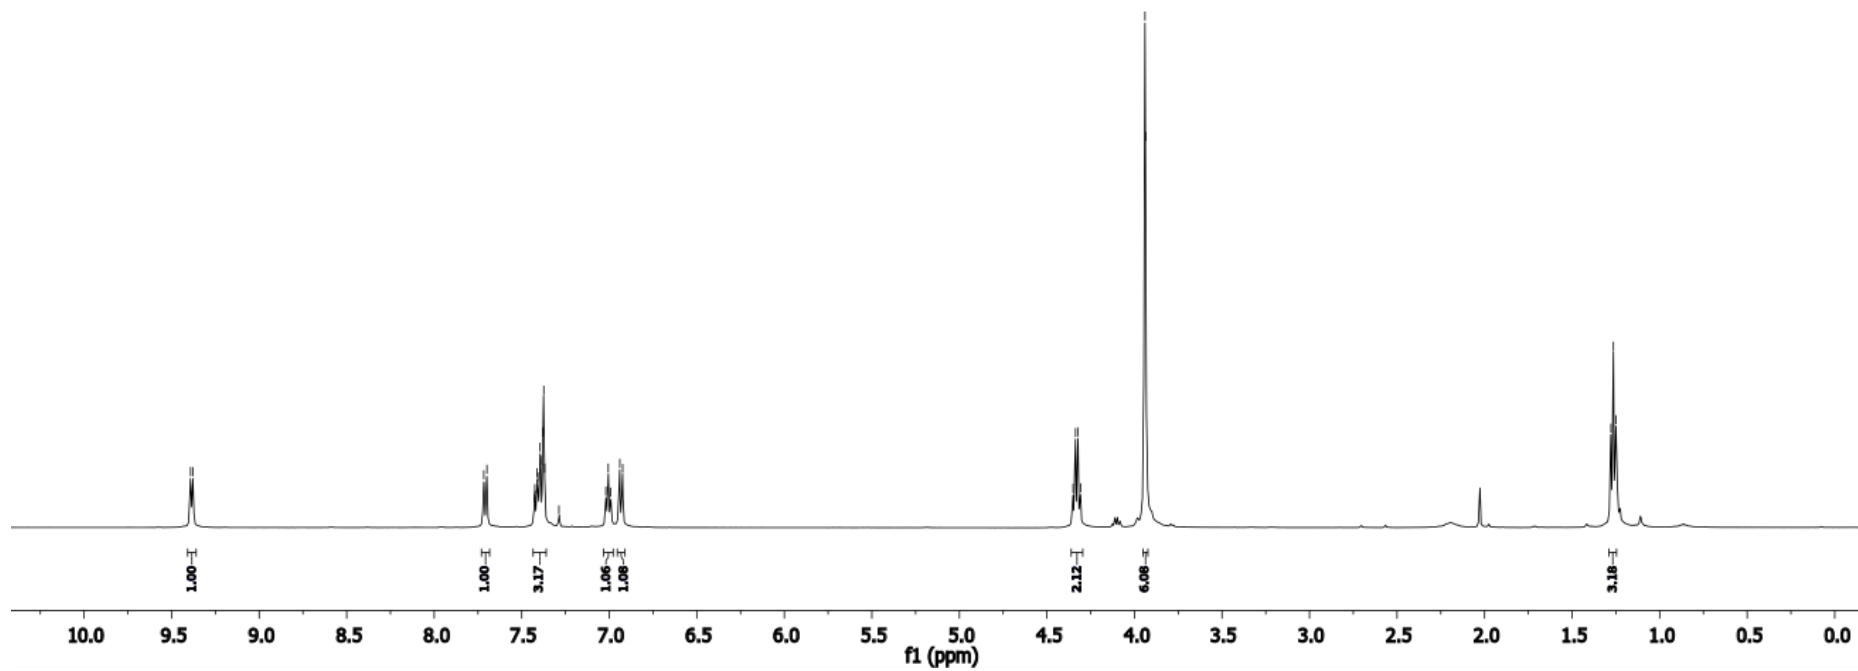



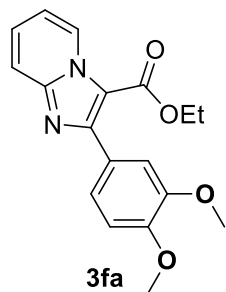

161.14  
153.44  
149.60  
148.16  
147.01

128.37  
127.88  
127.02  
123.35

117.29  
113.93  
113.39  
111.68  
110.23

77.38  
77.12  
76.87

60.39  
55.93  
55.92

14.21

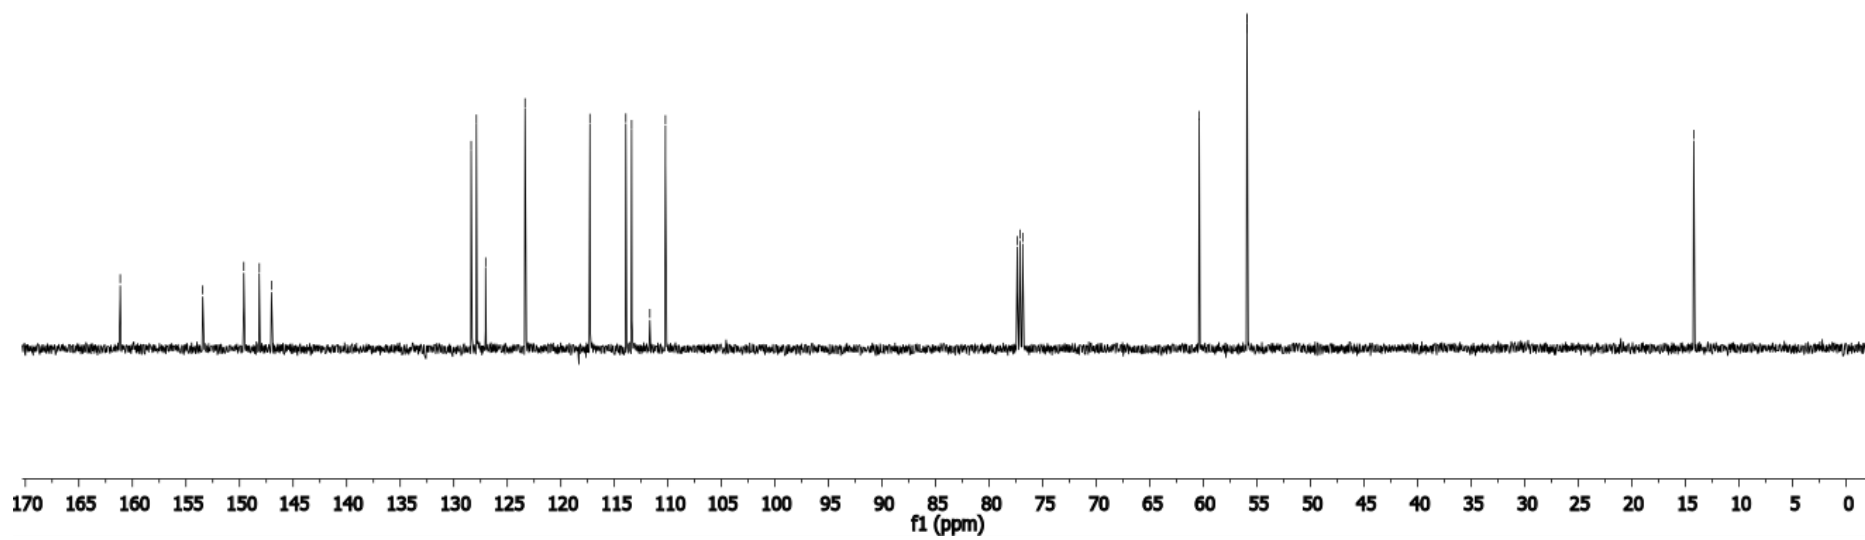

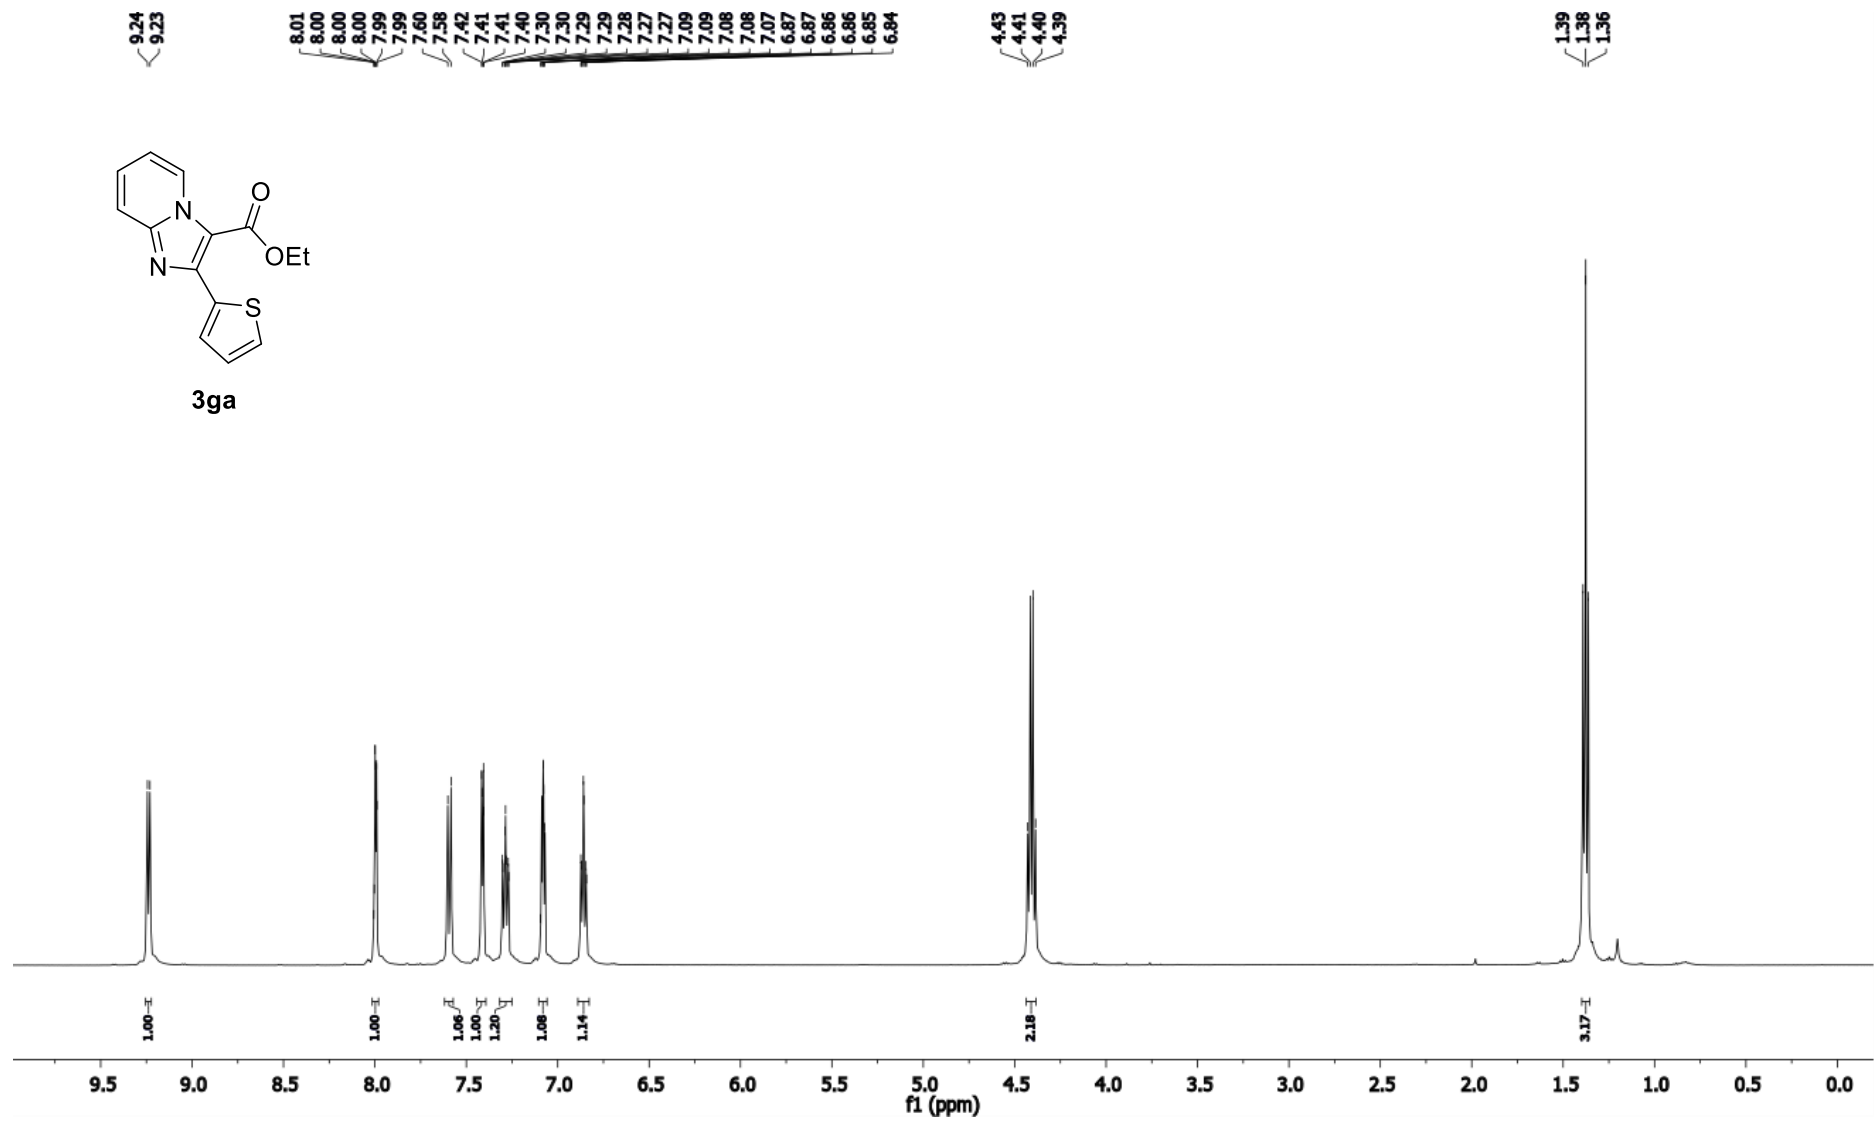

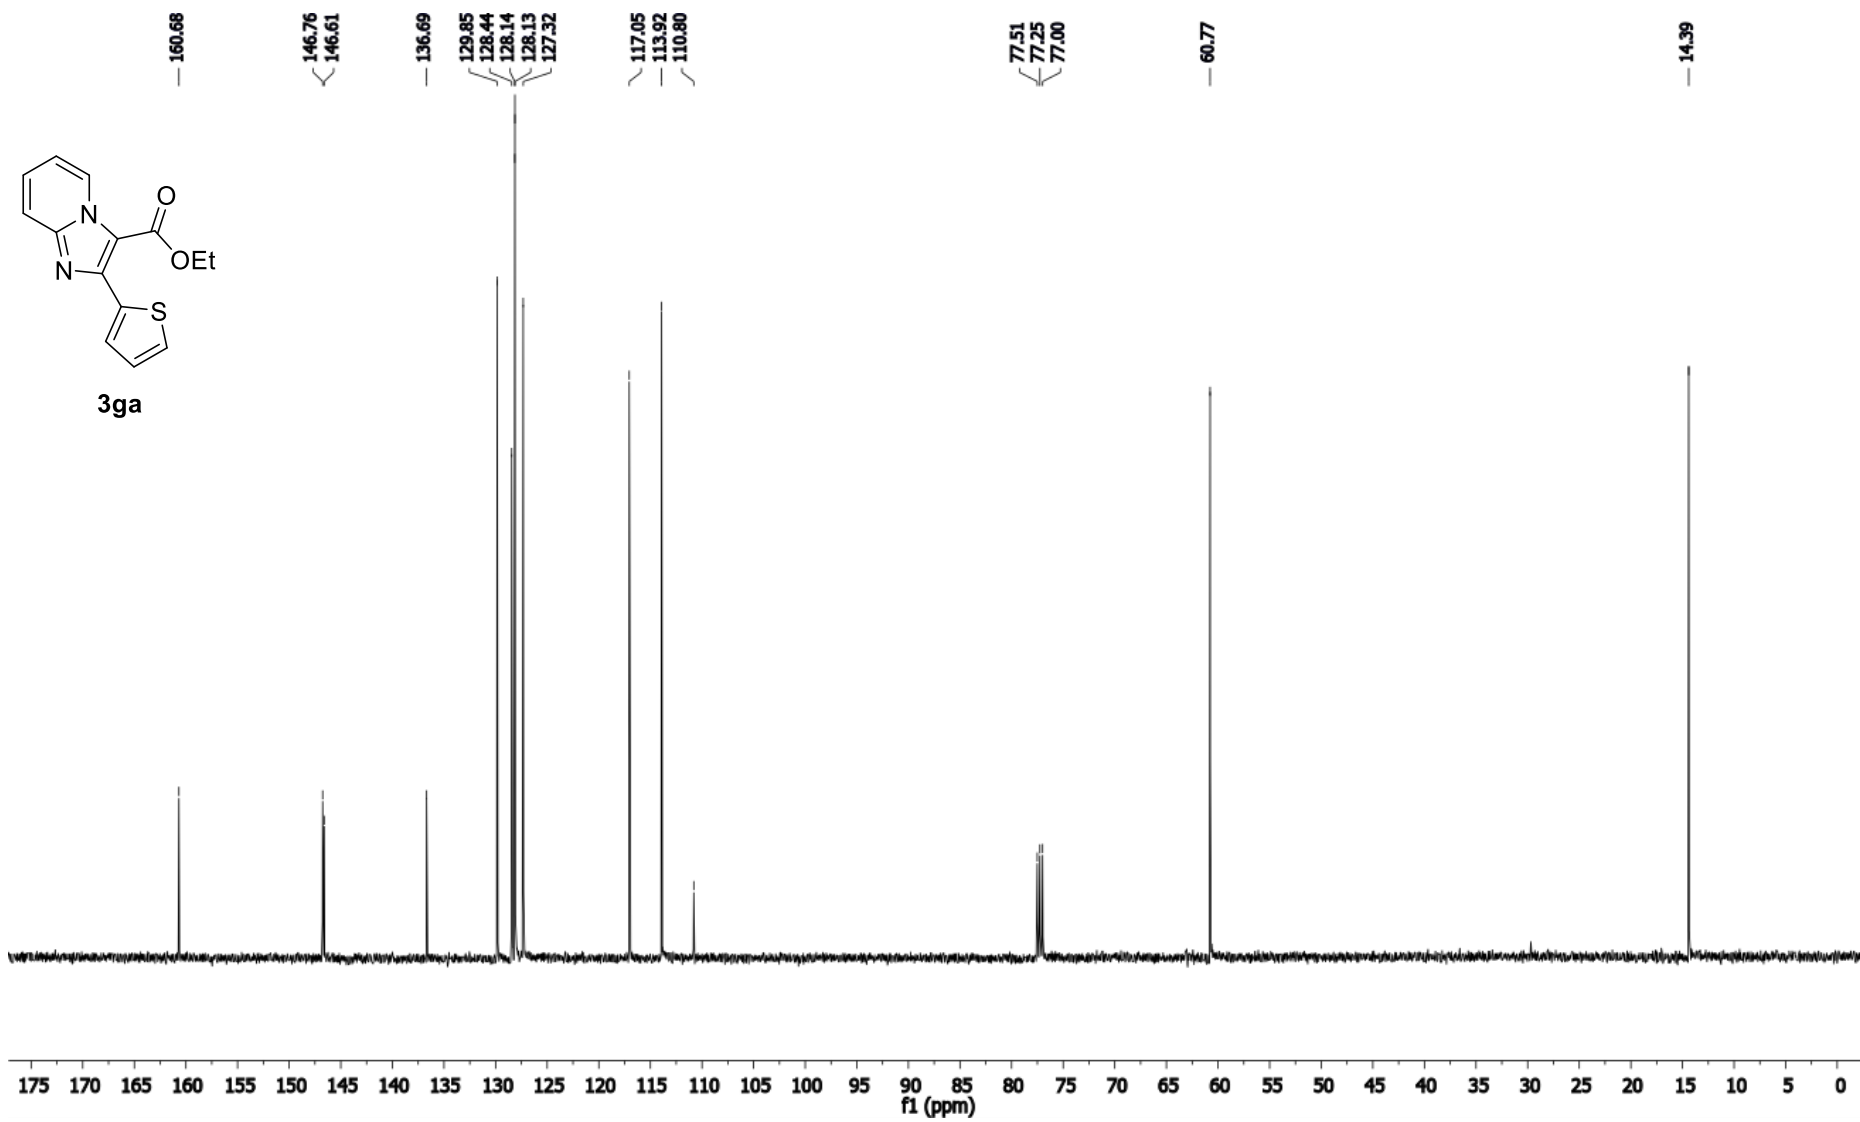

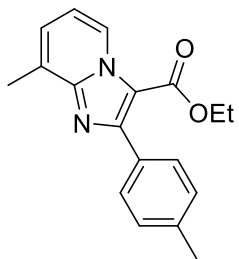

3ha

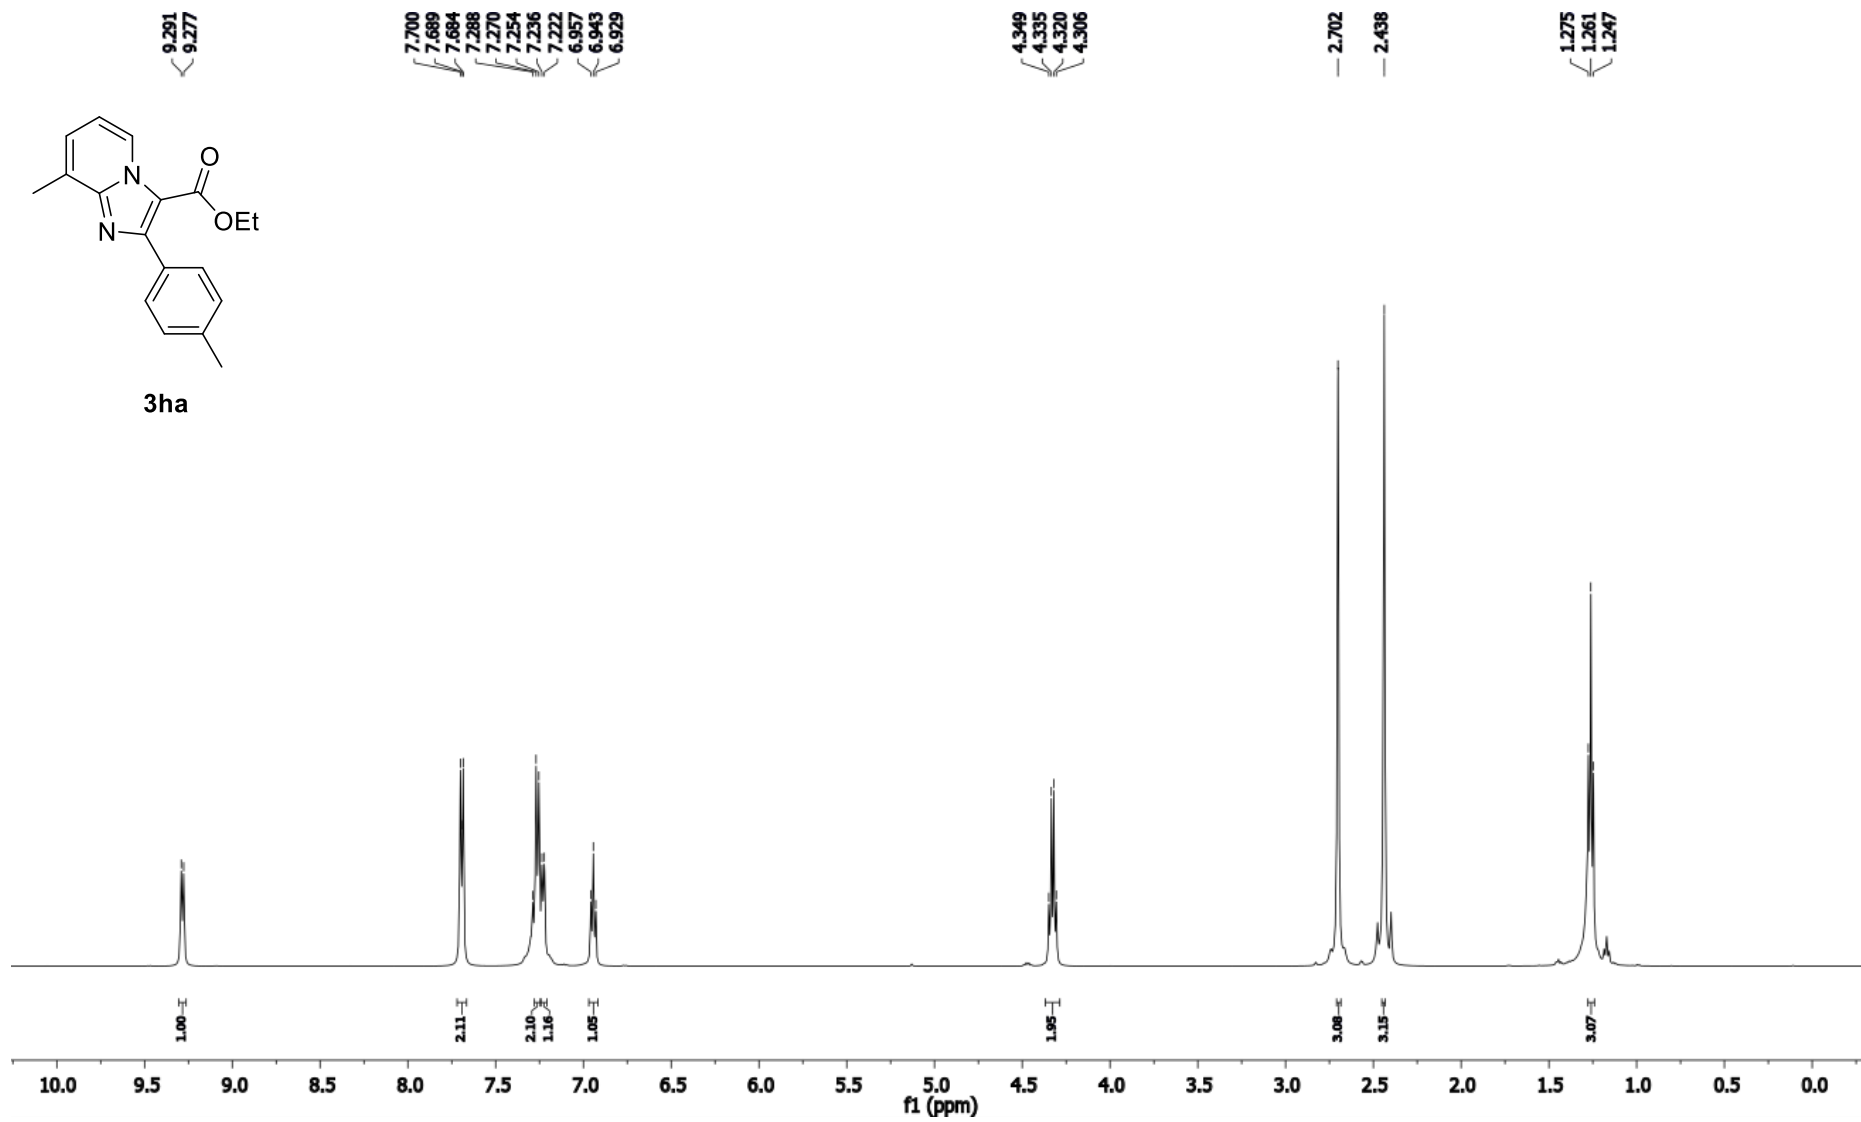

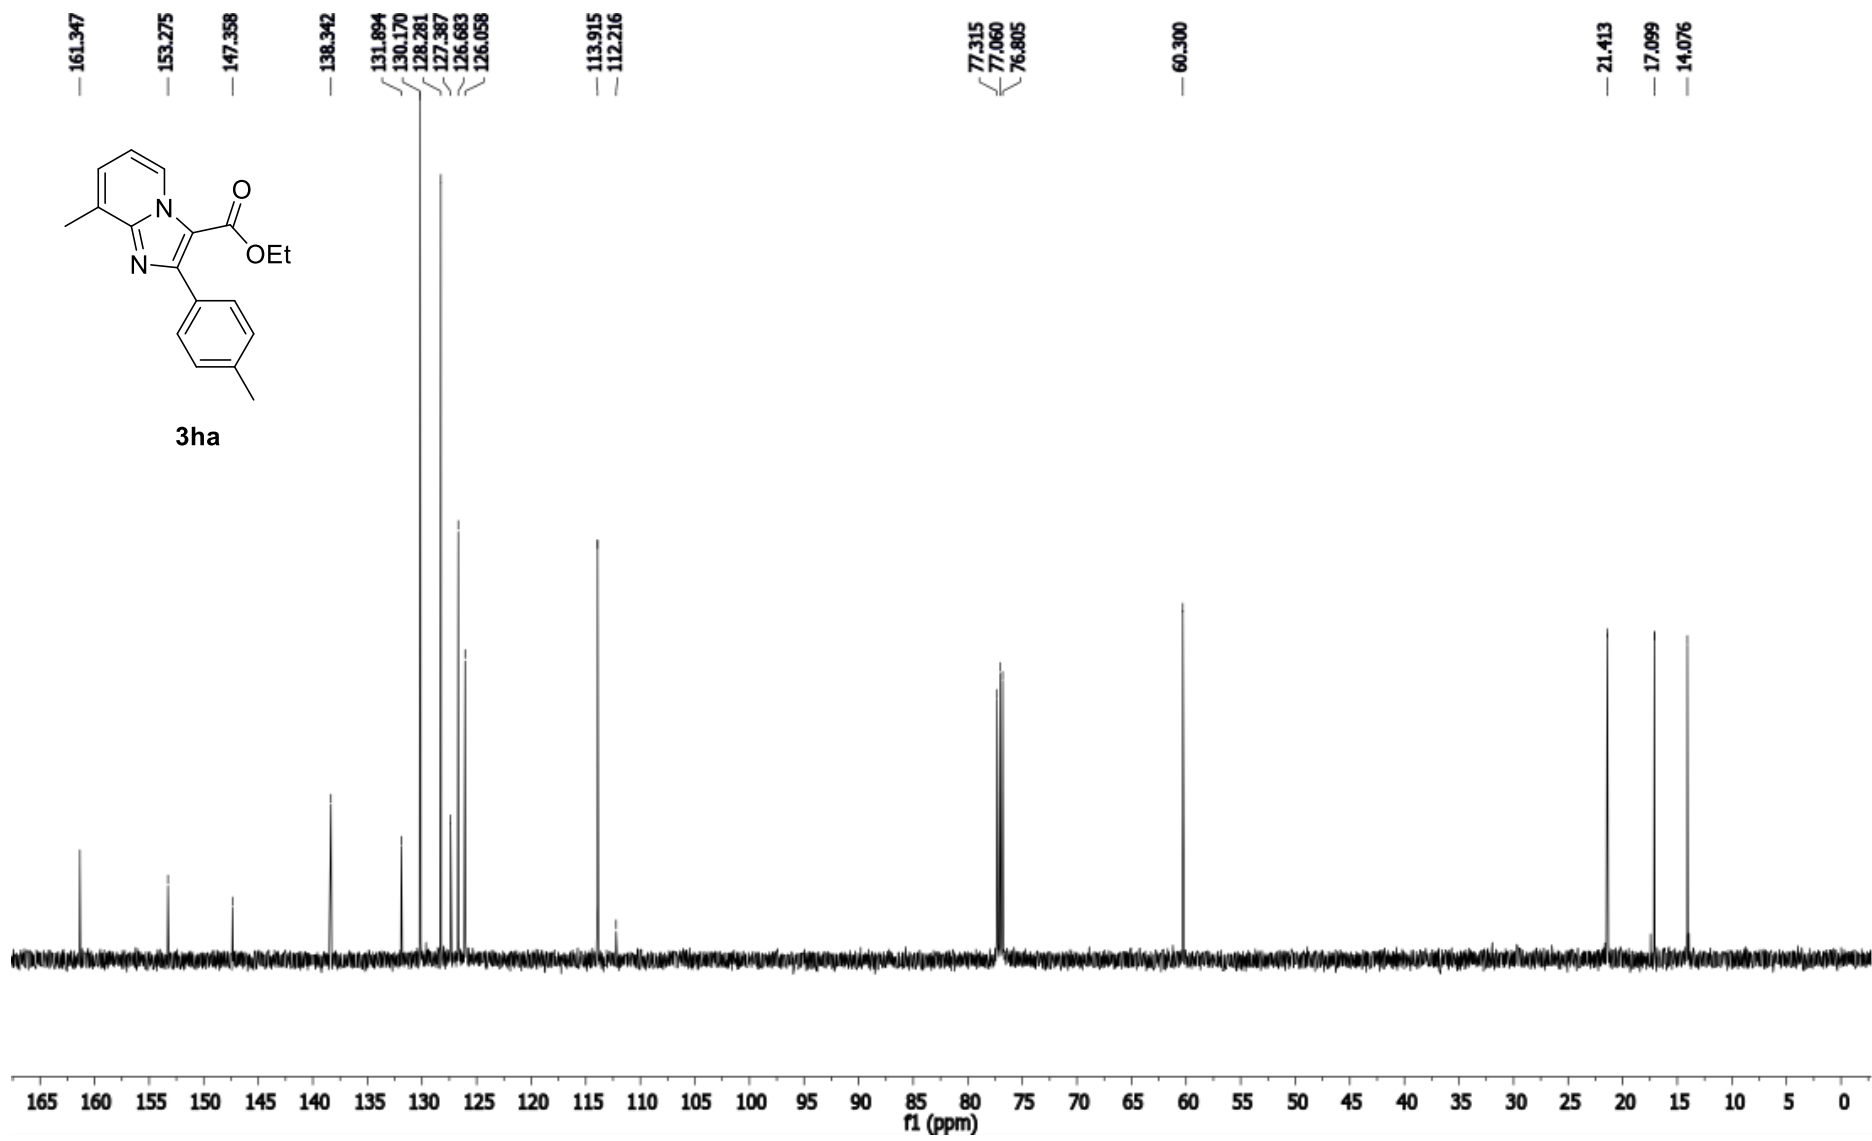

9.29  
9.28

7.79  
7.77  
7.76  
7.29  
7.26  
7.25  
7.16  
7.14  
7.12  
6.98  
6.96

4.34  
4.33  
4.31  
4.30

2.70

1.26  
1.24  
1.23

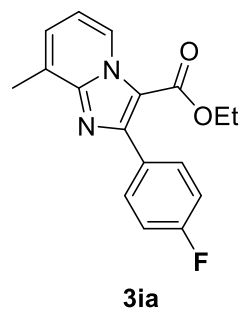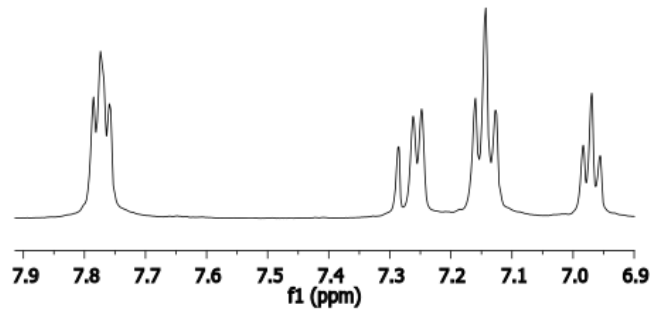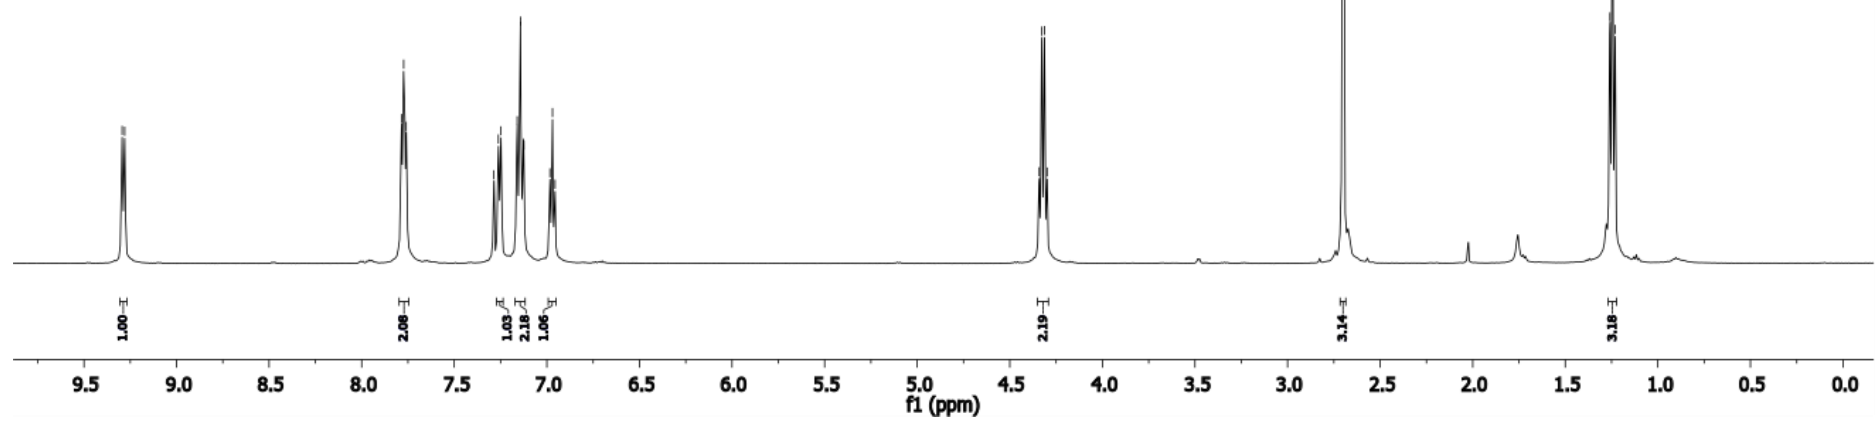

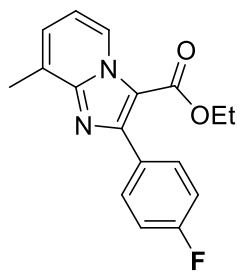

3ia

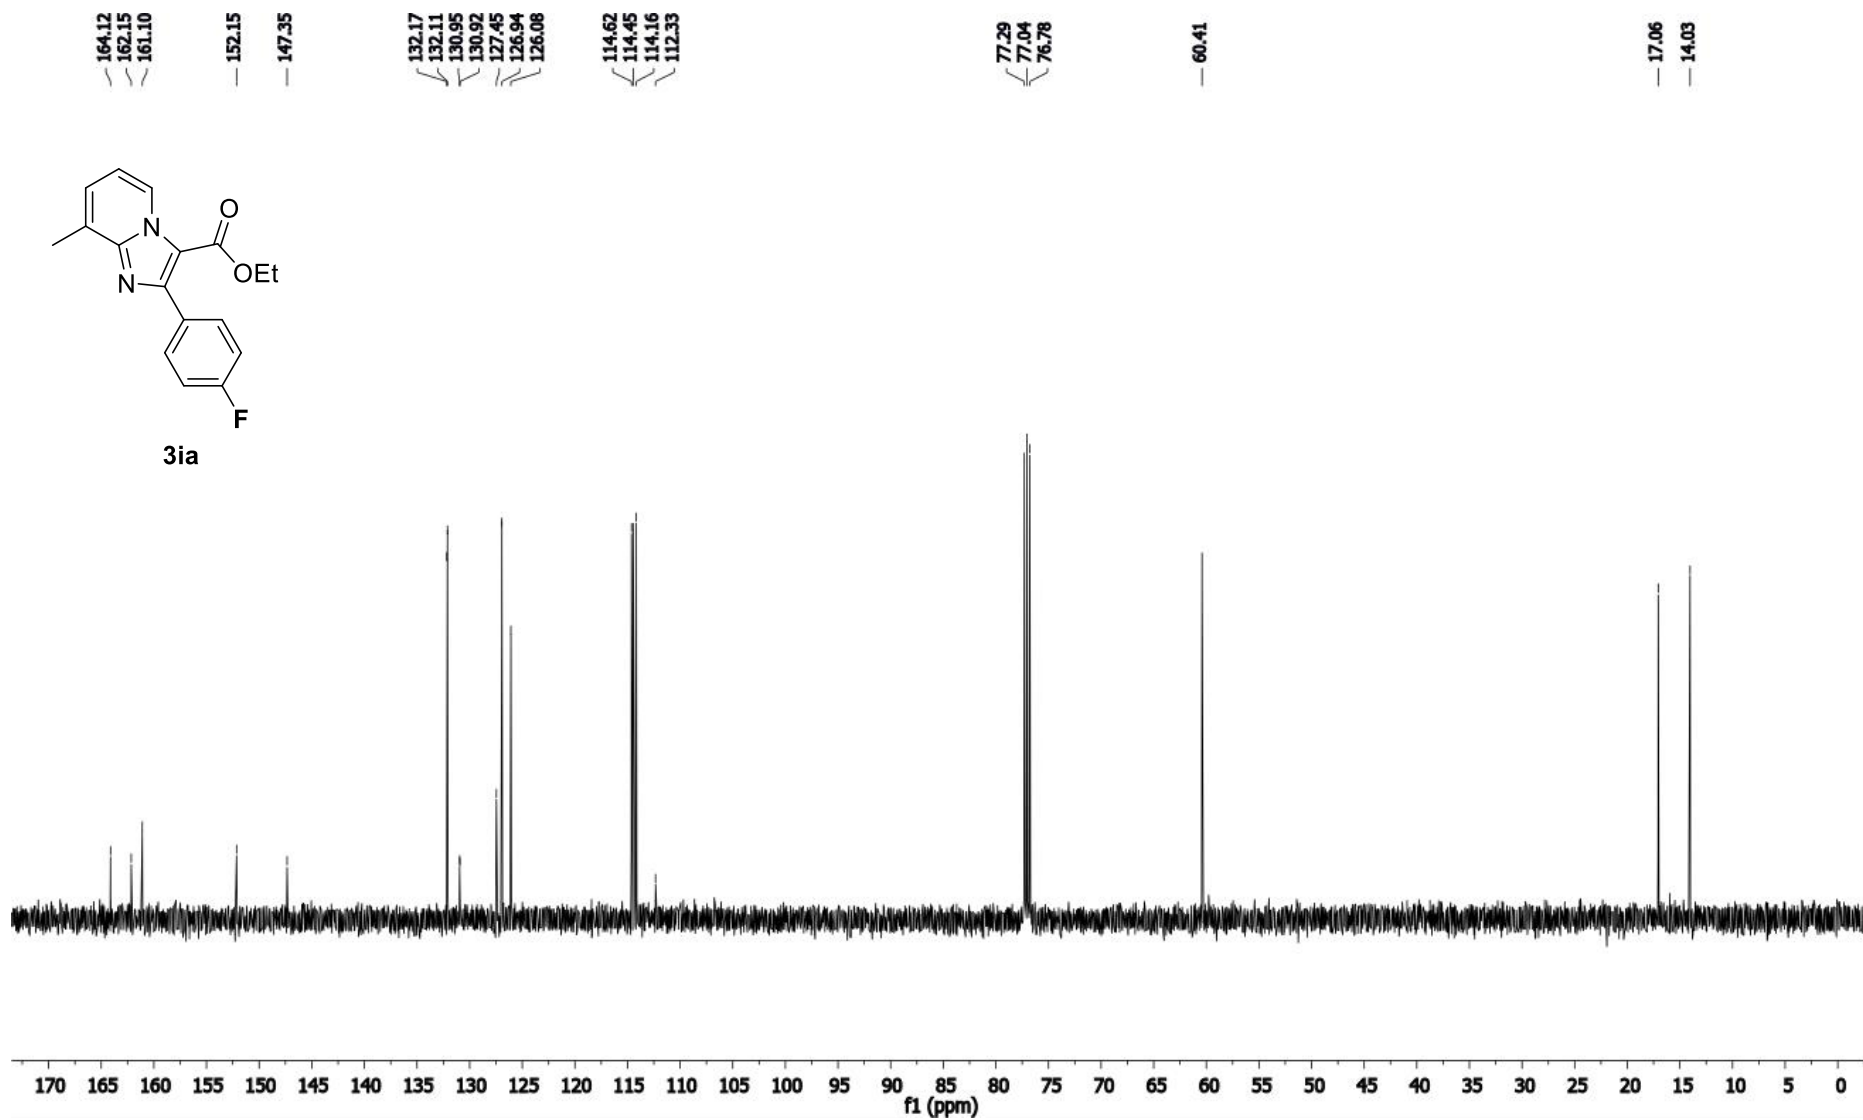

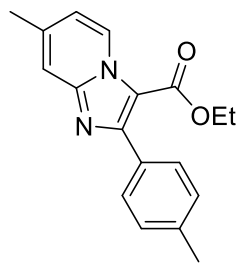

3ja

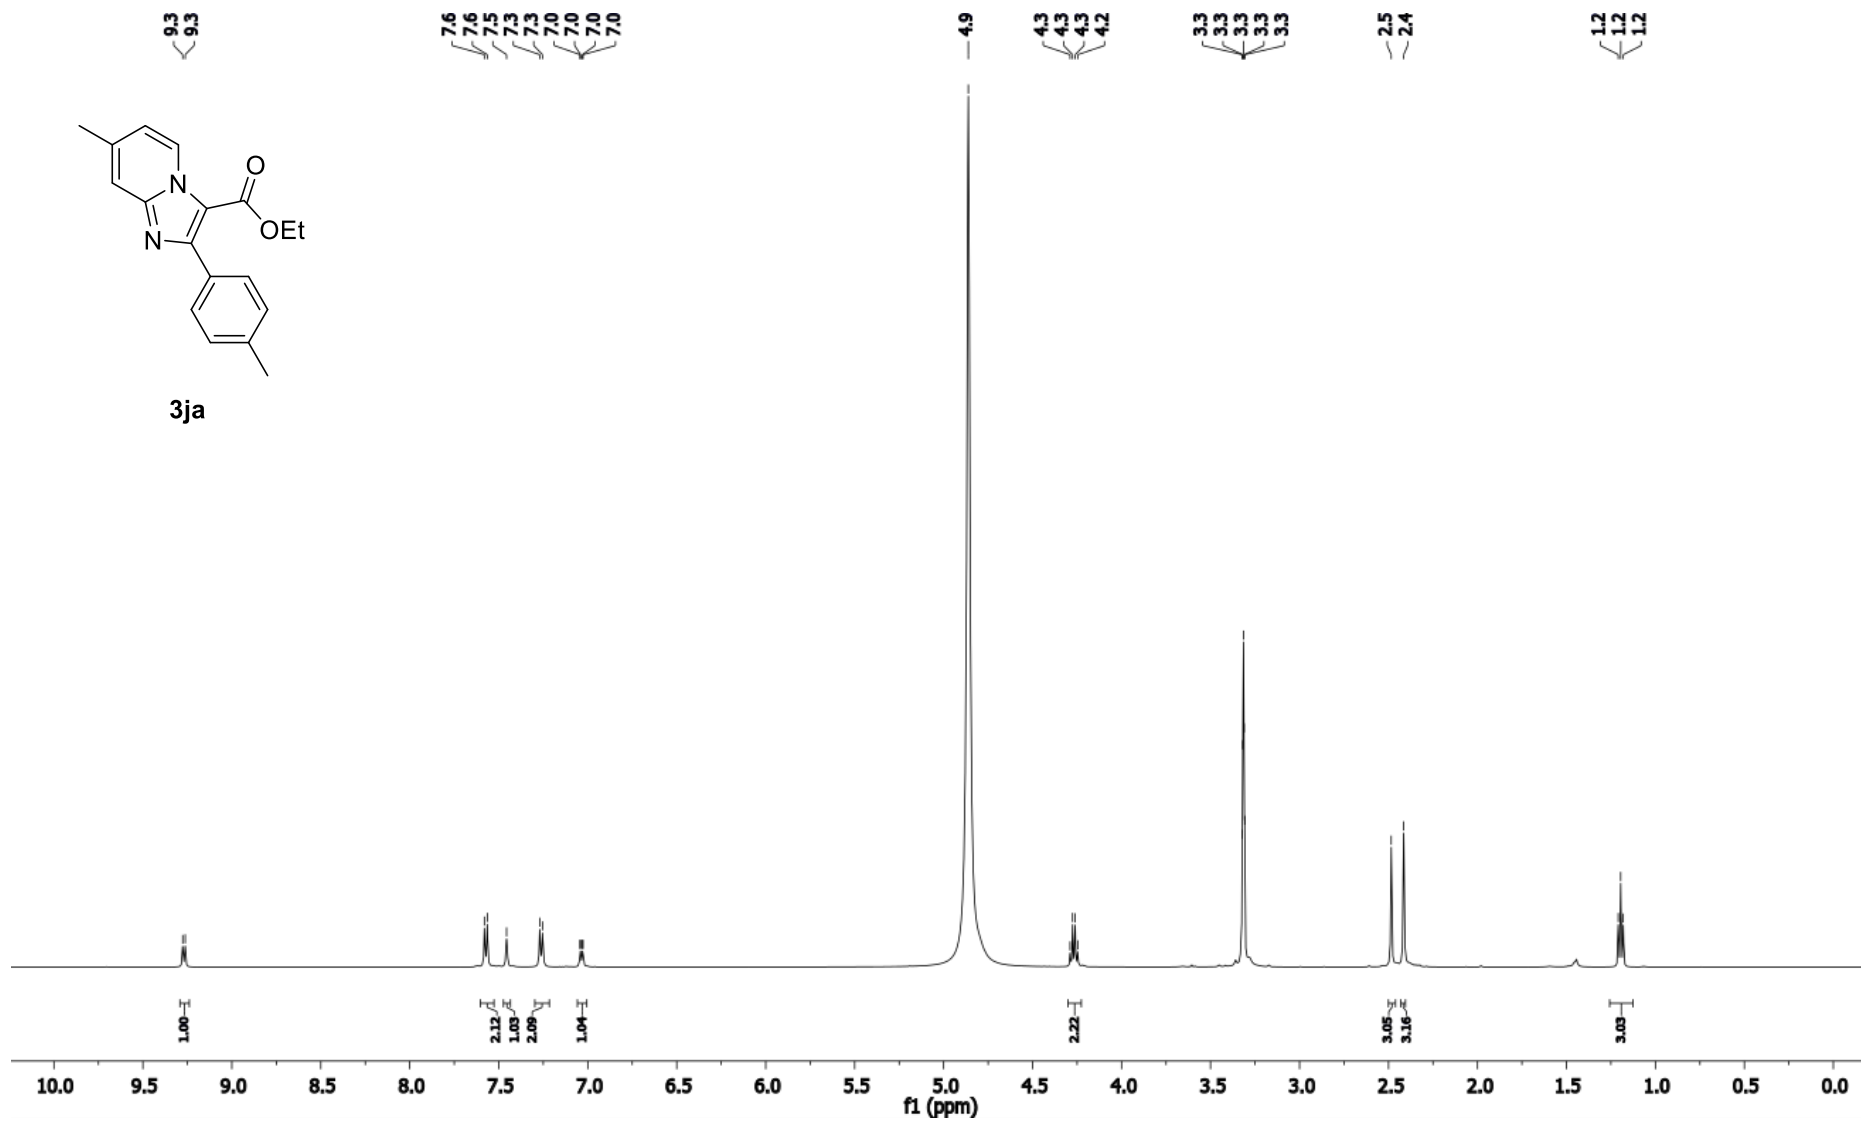



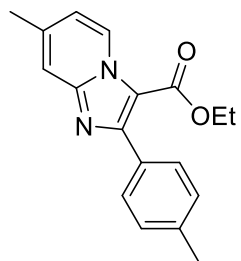

3ja

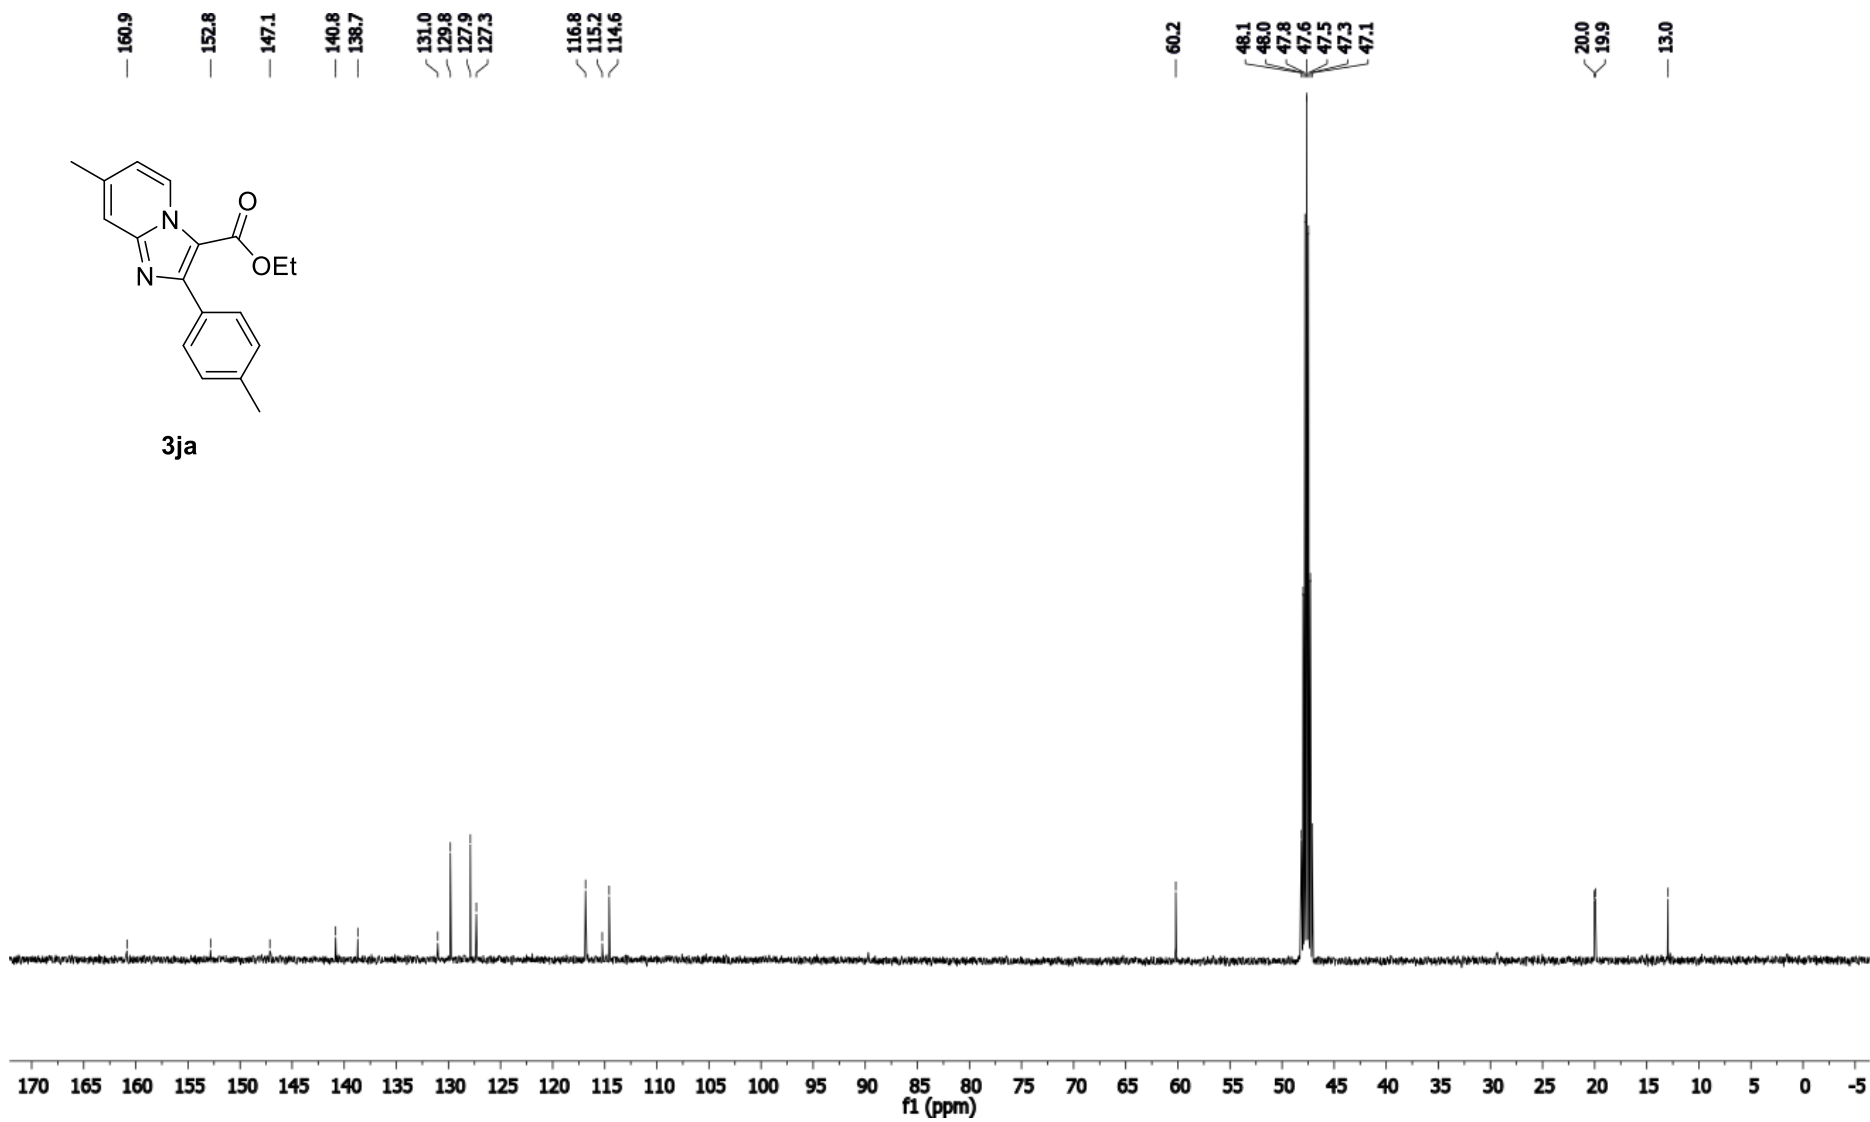

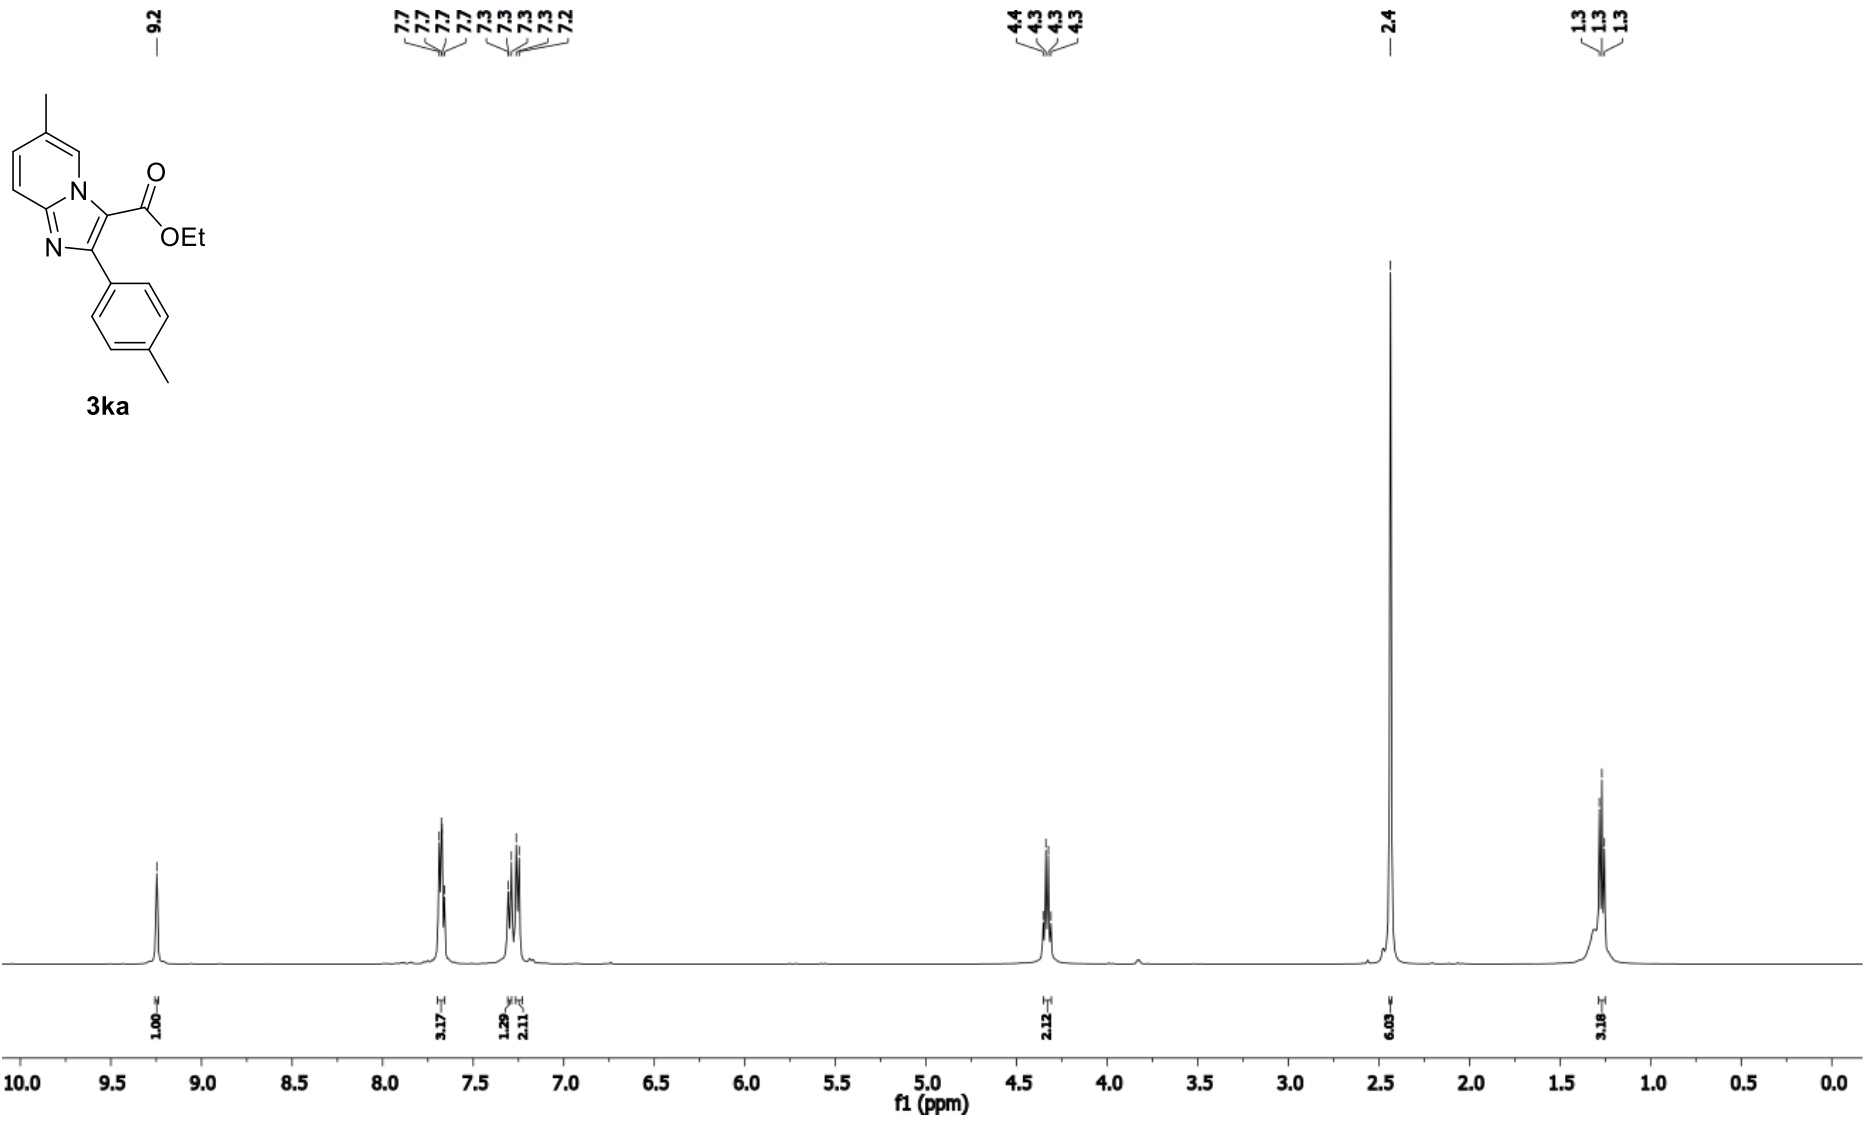

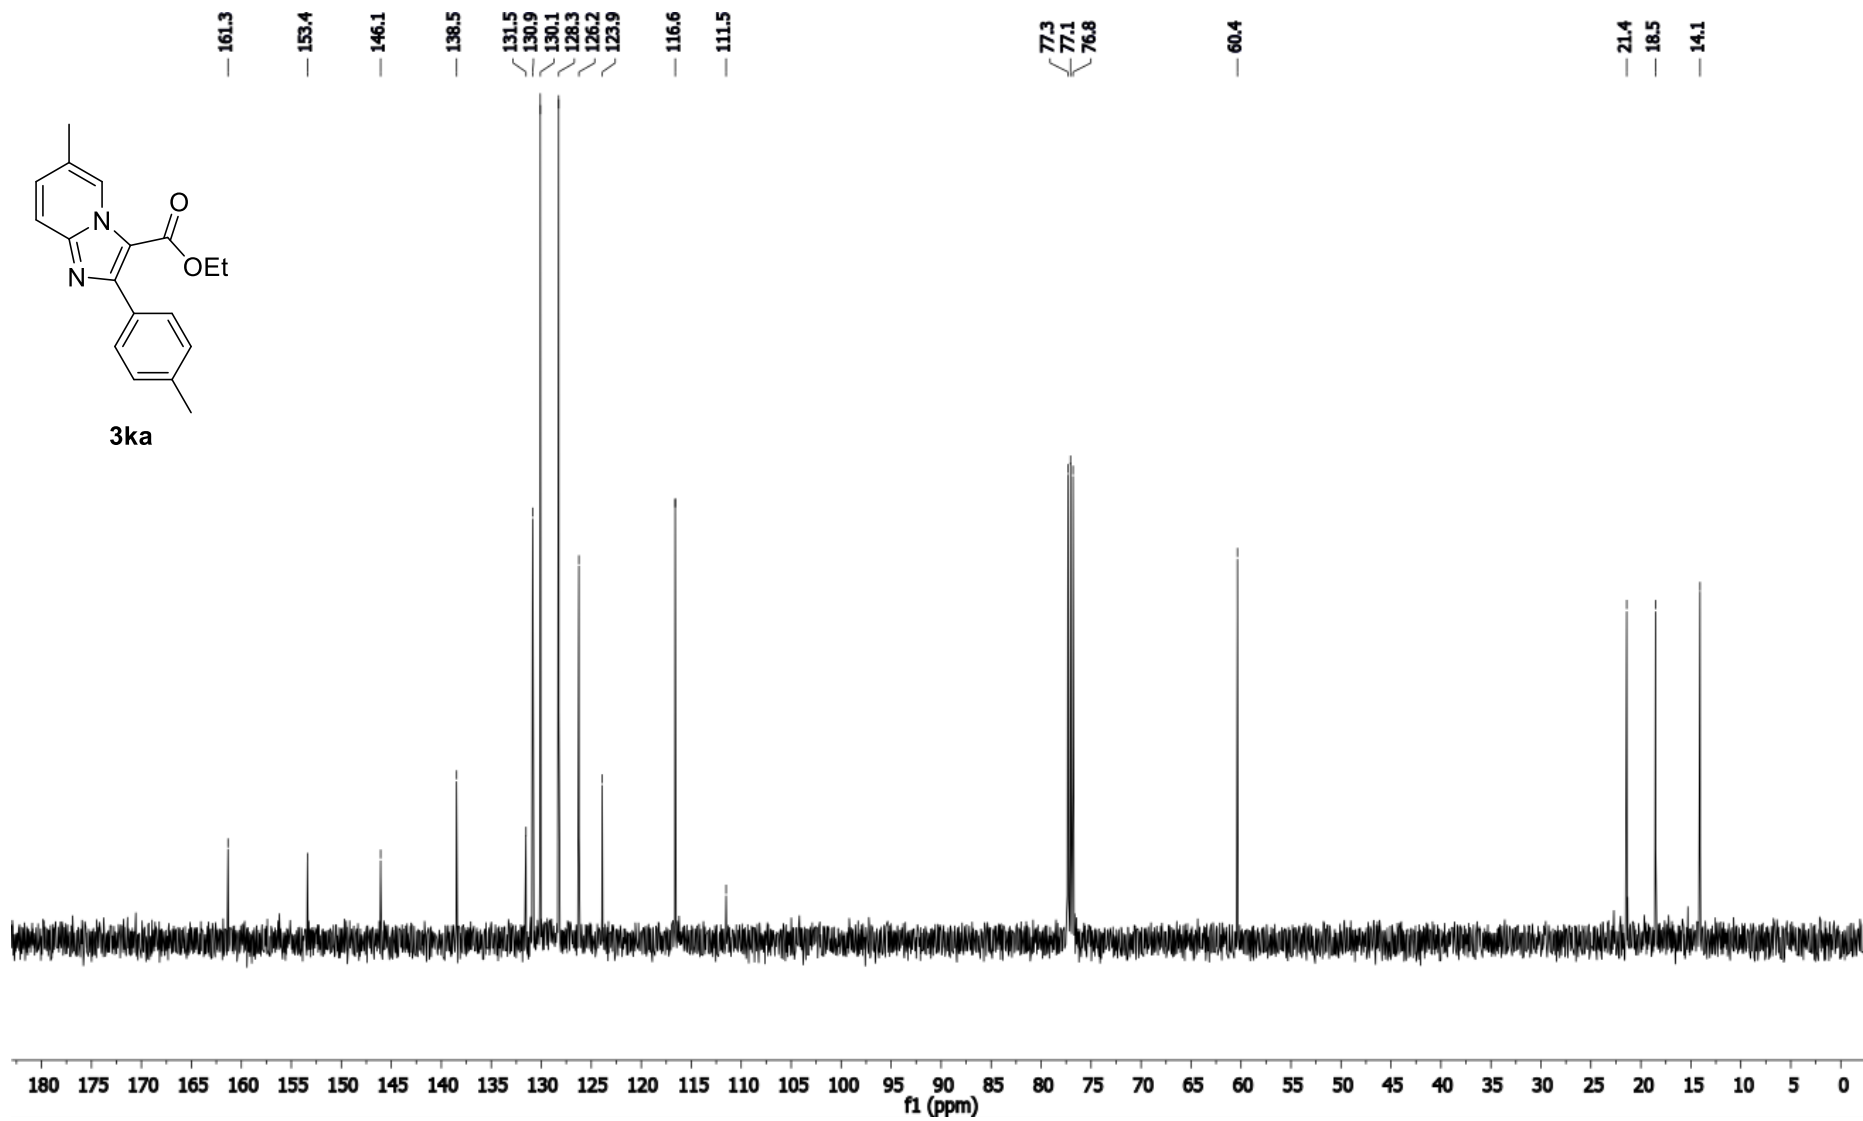

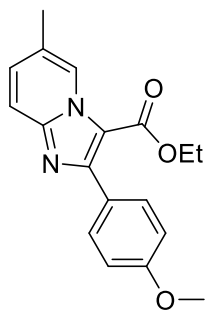

3la

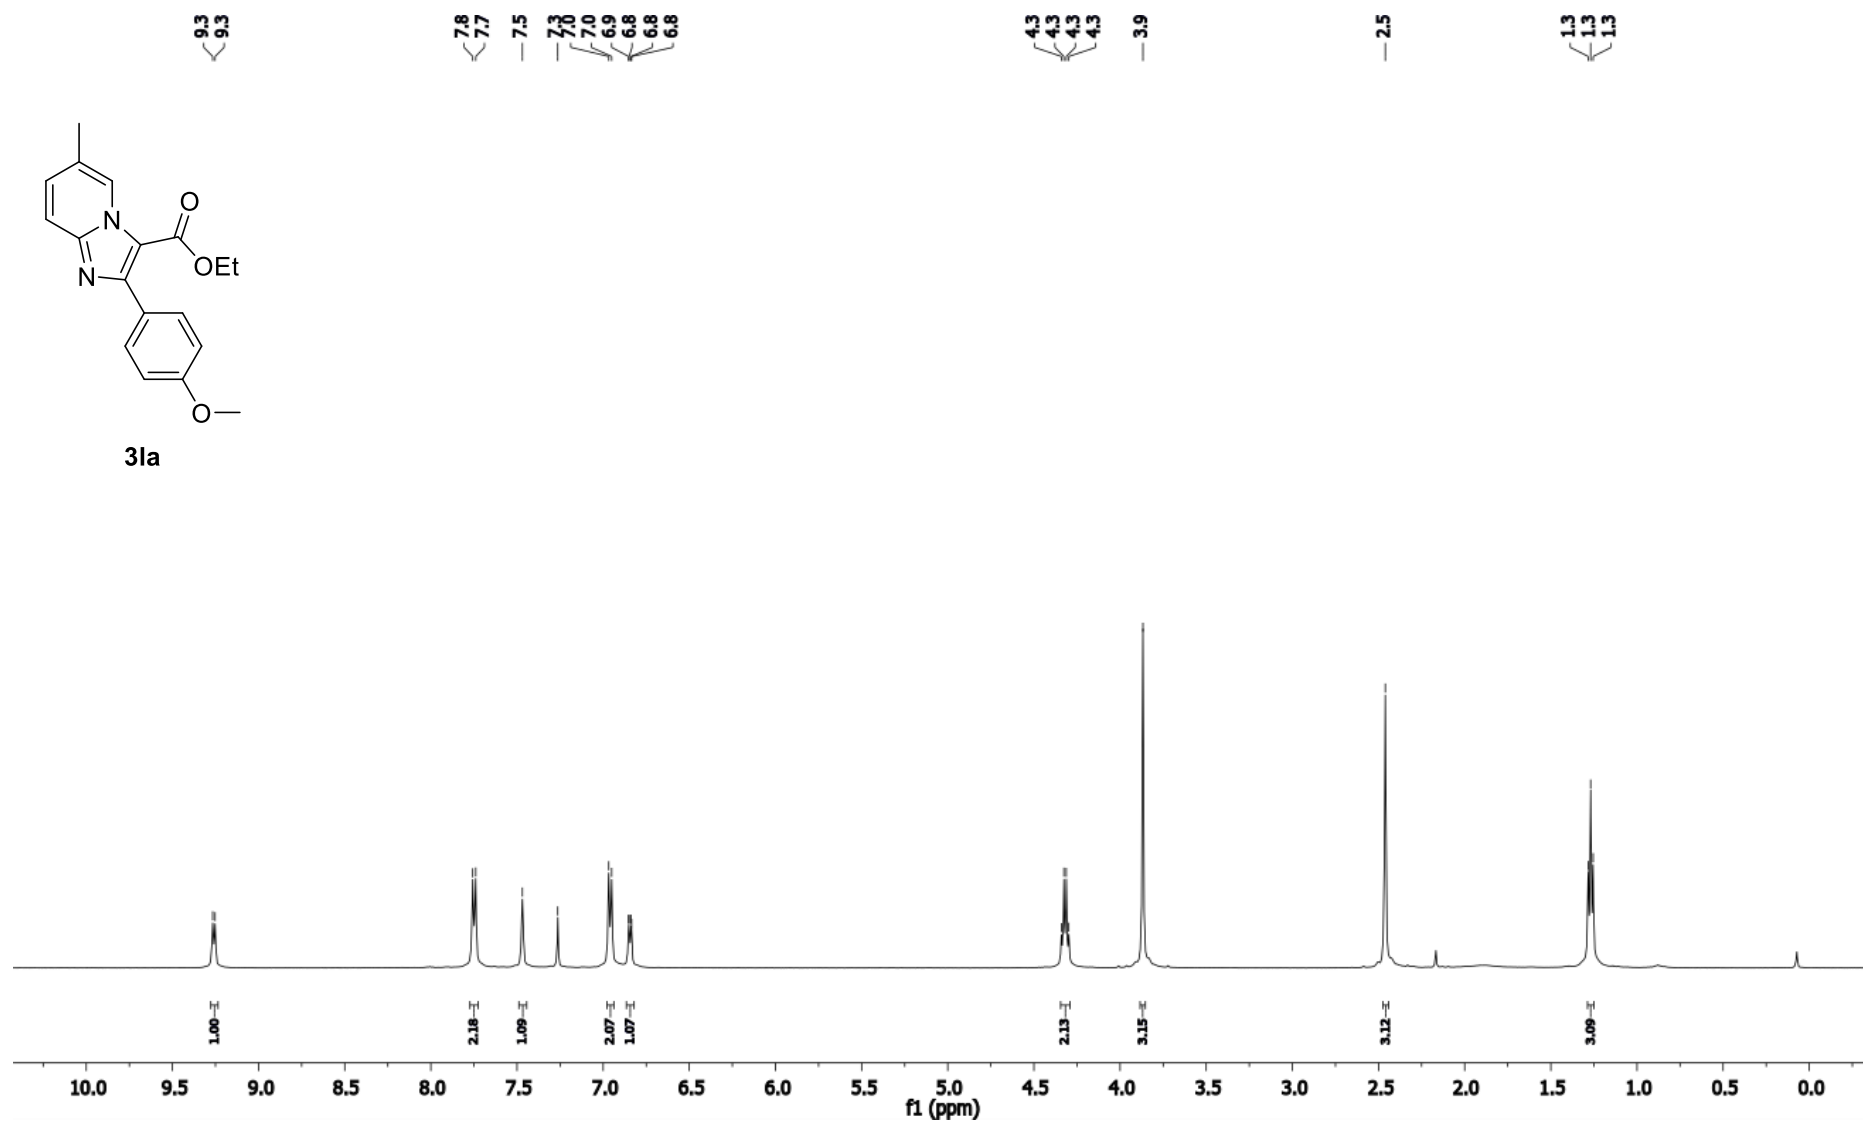

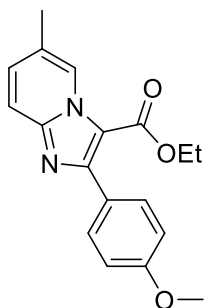

31a

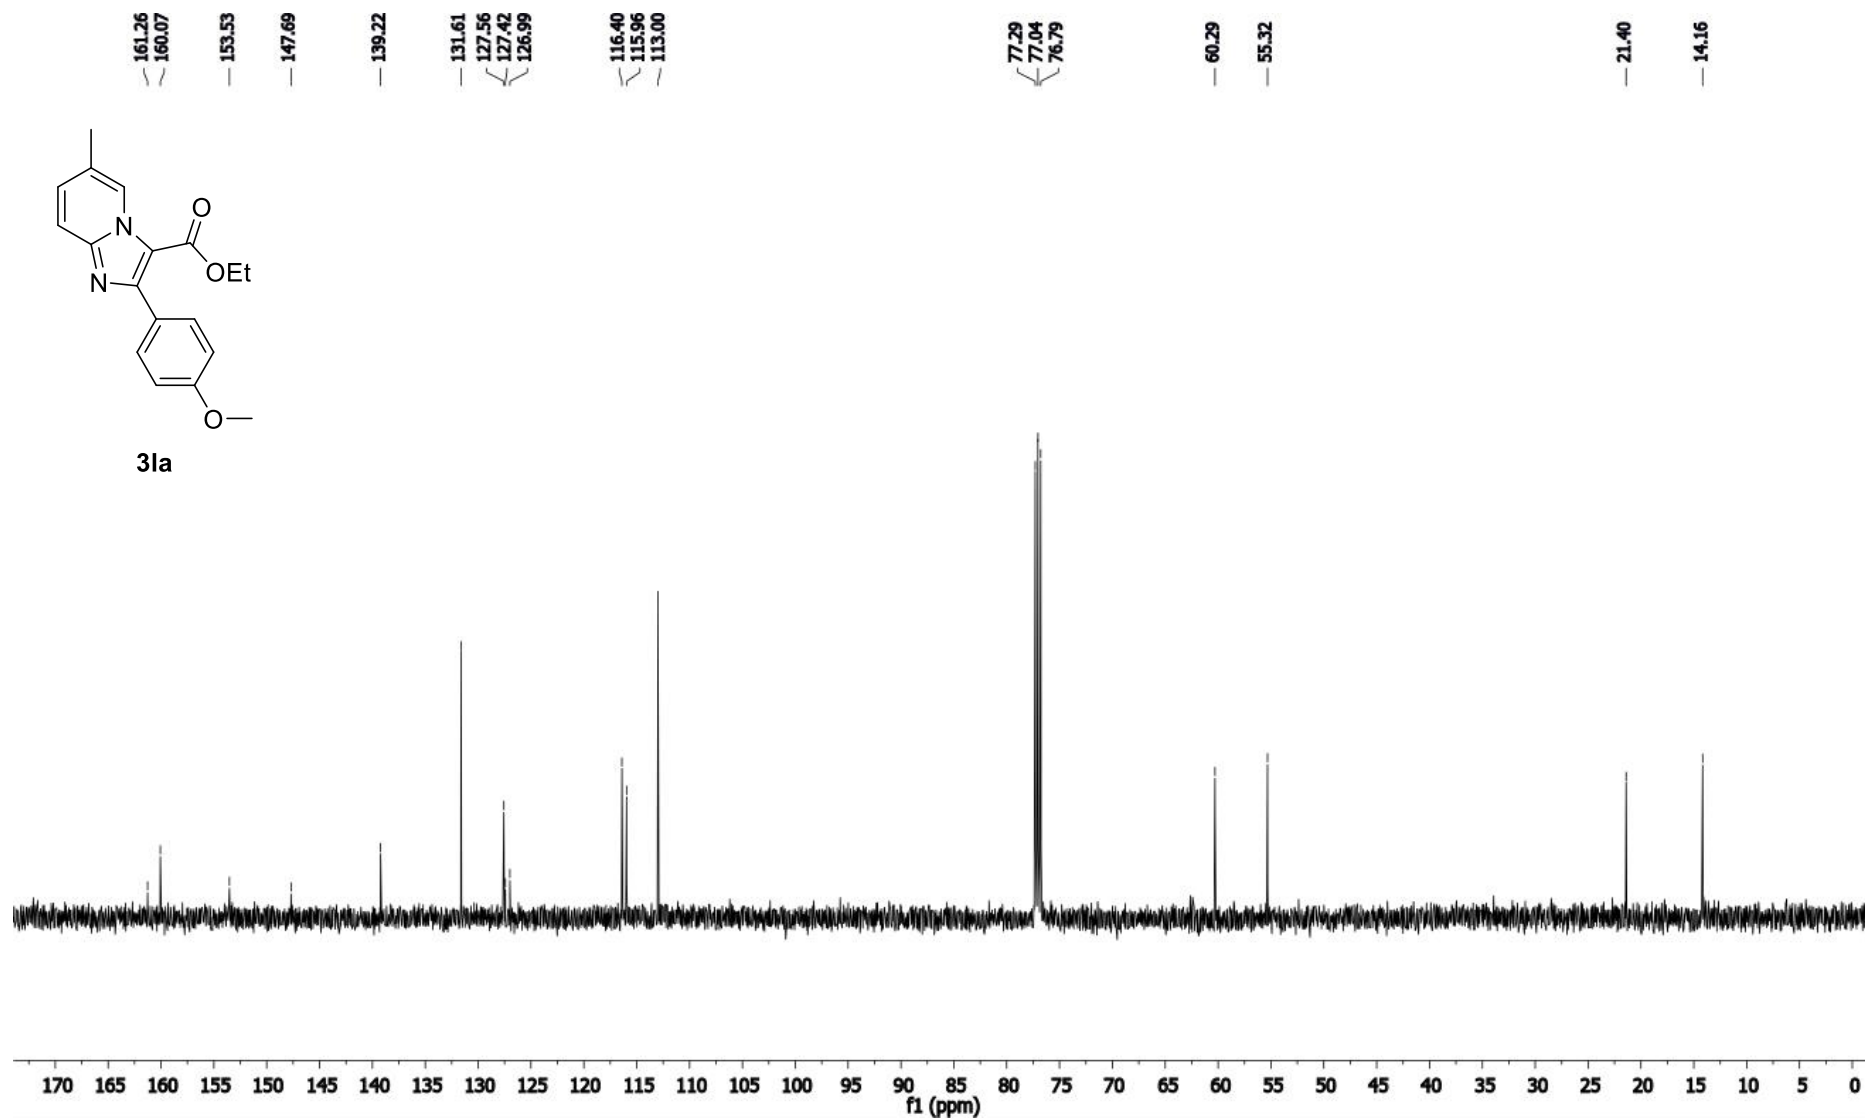

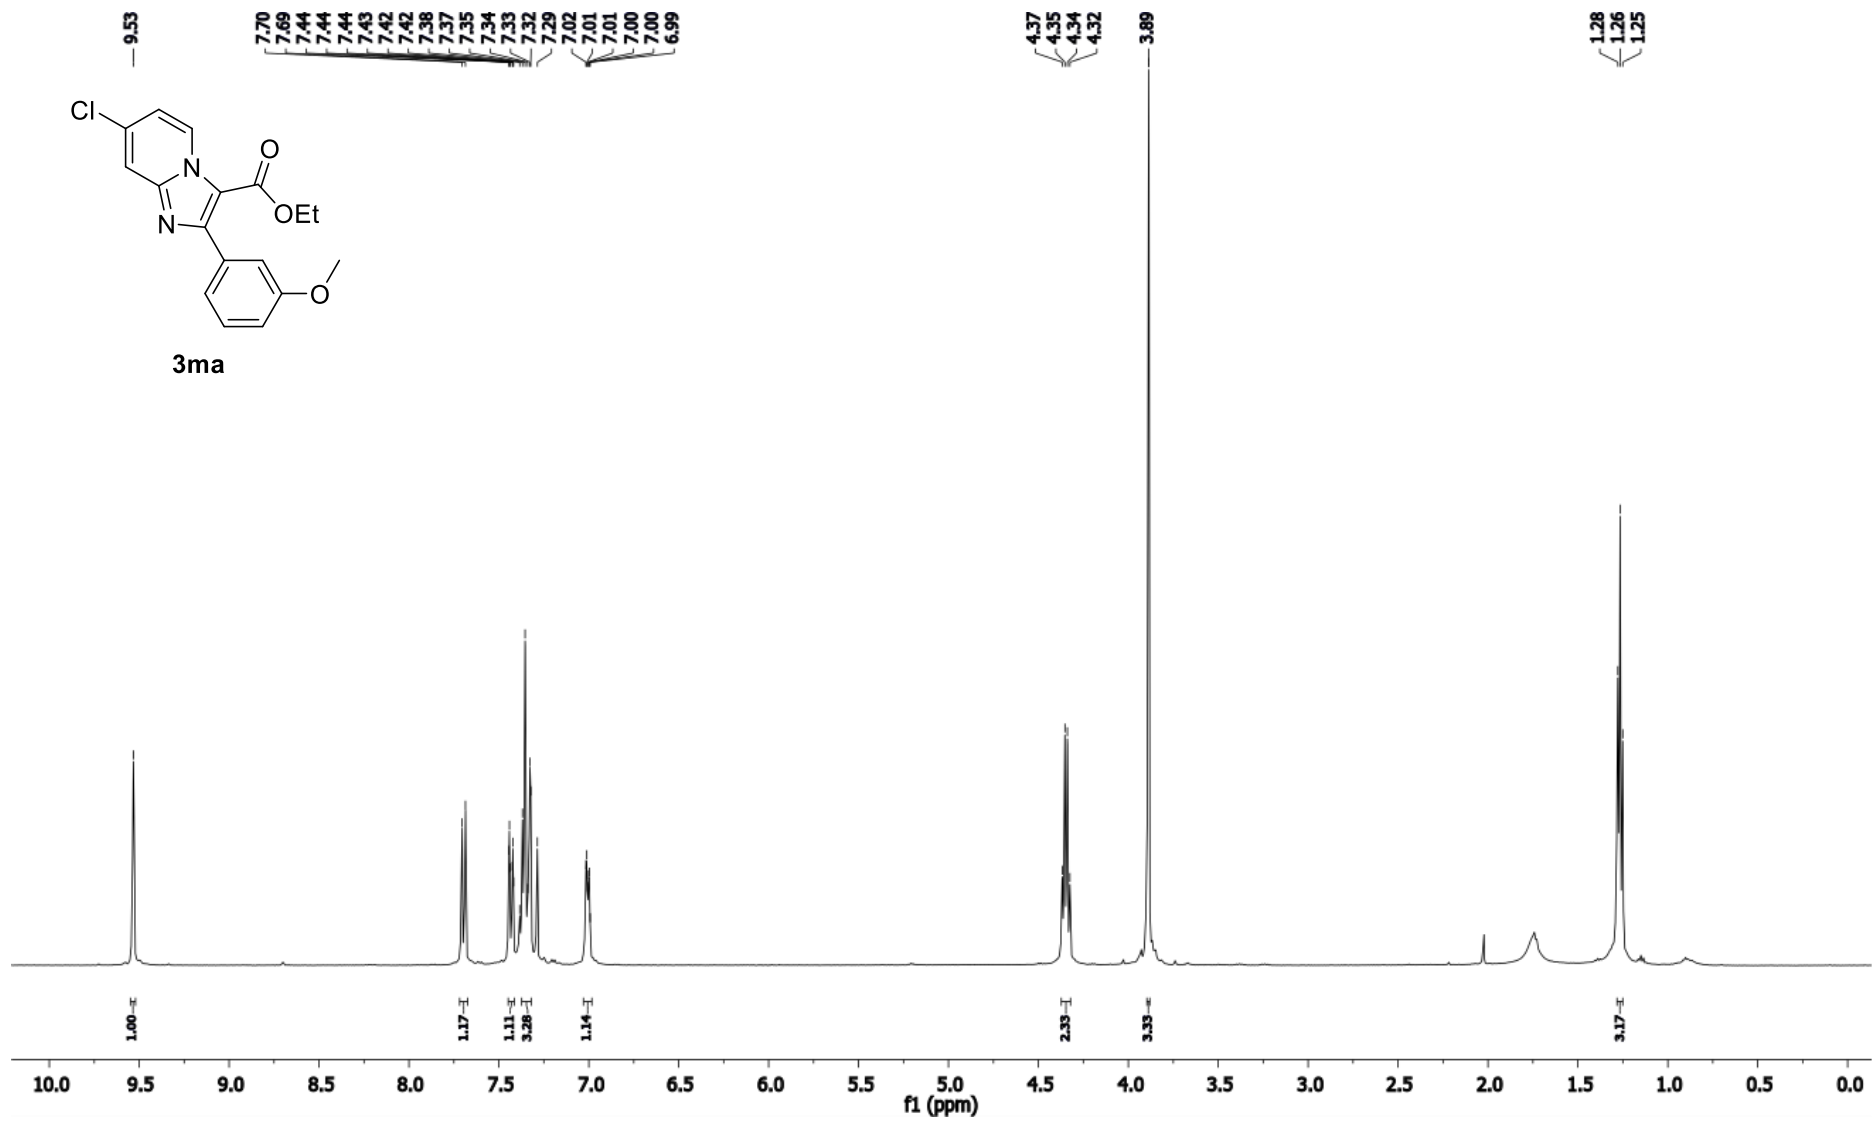

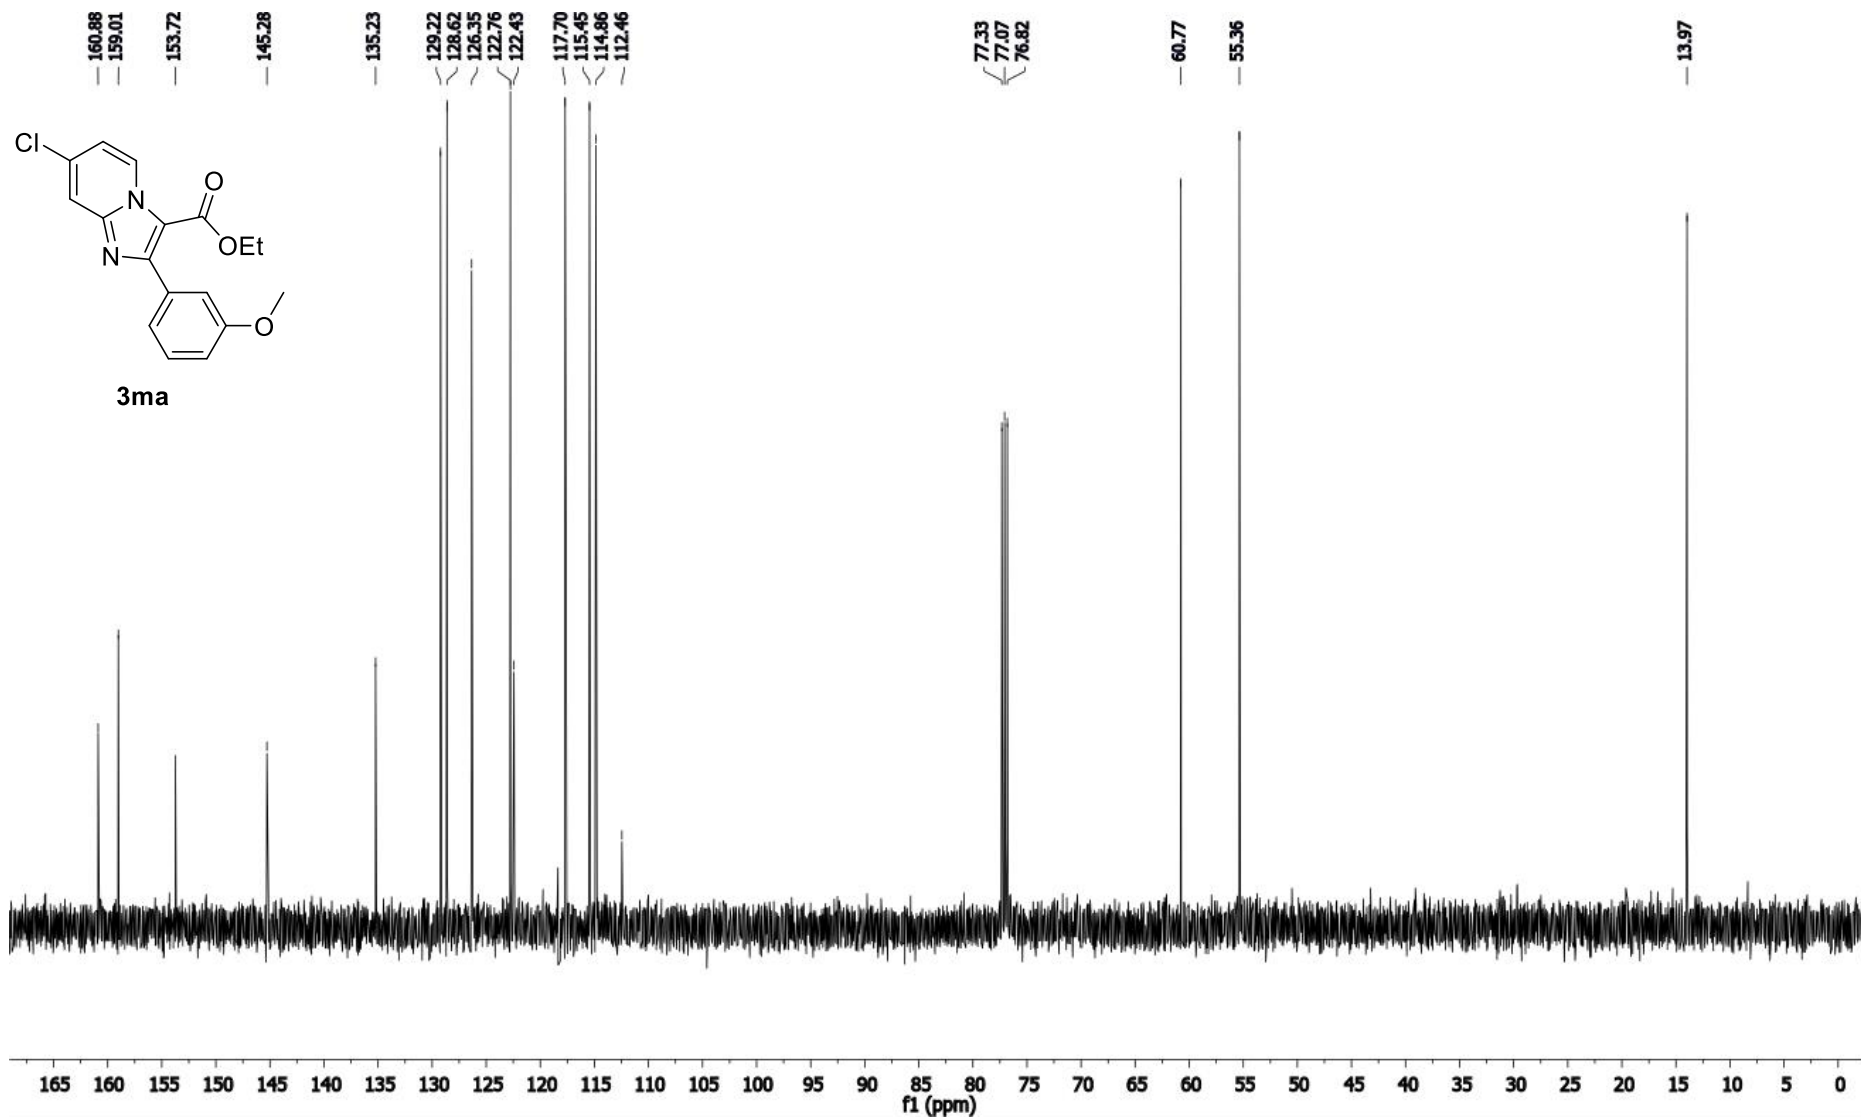

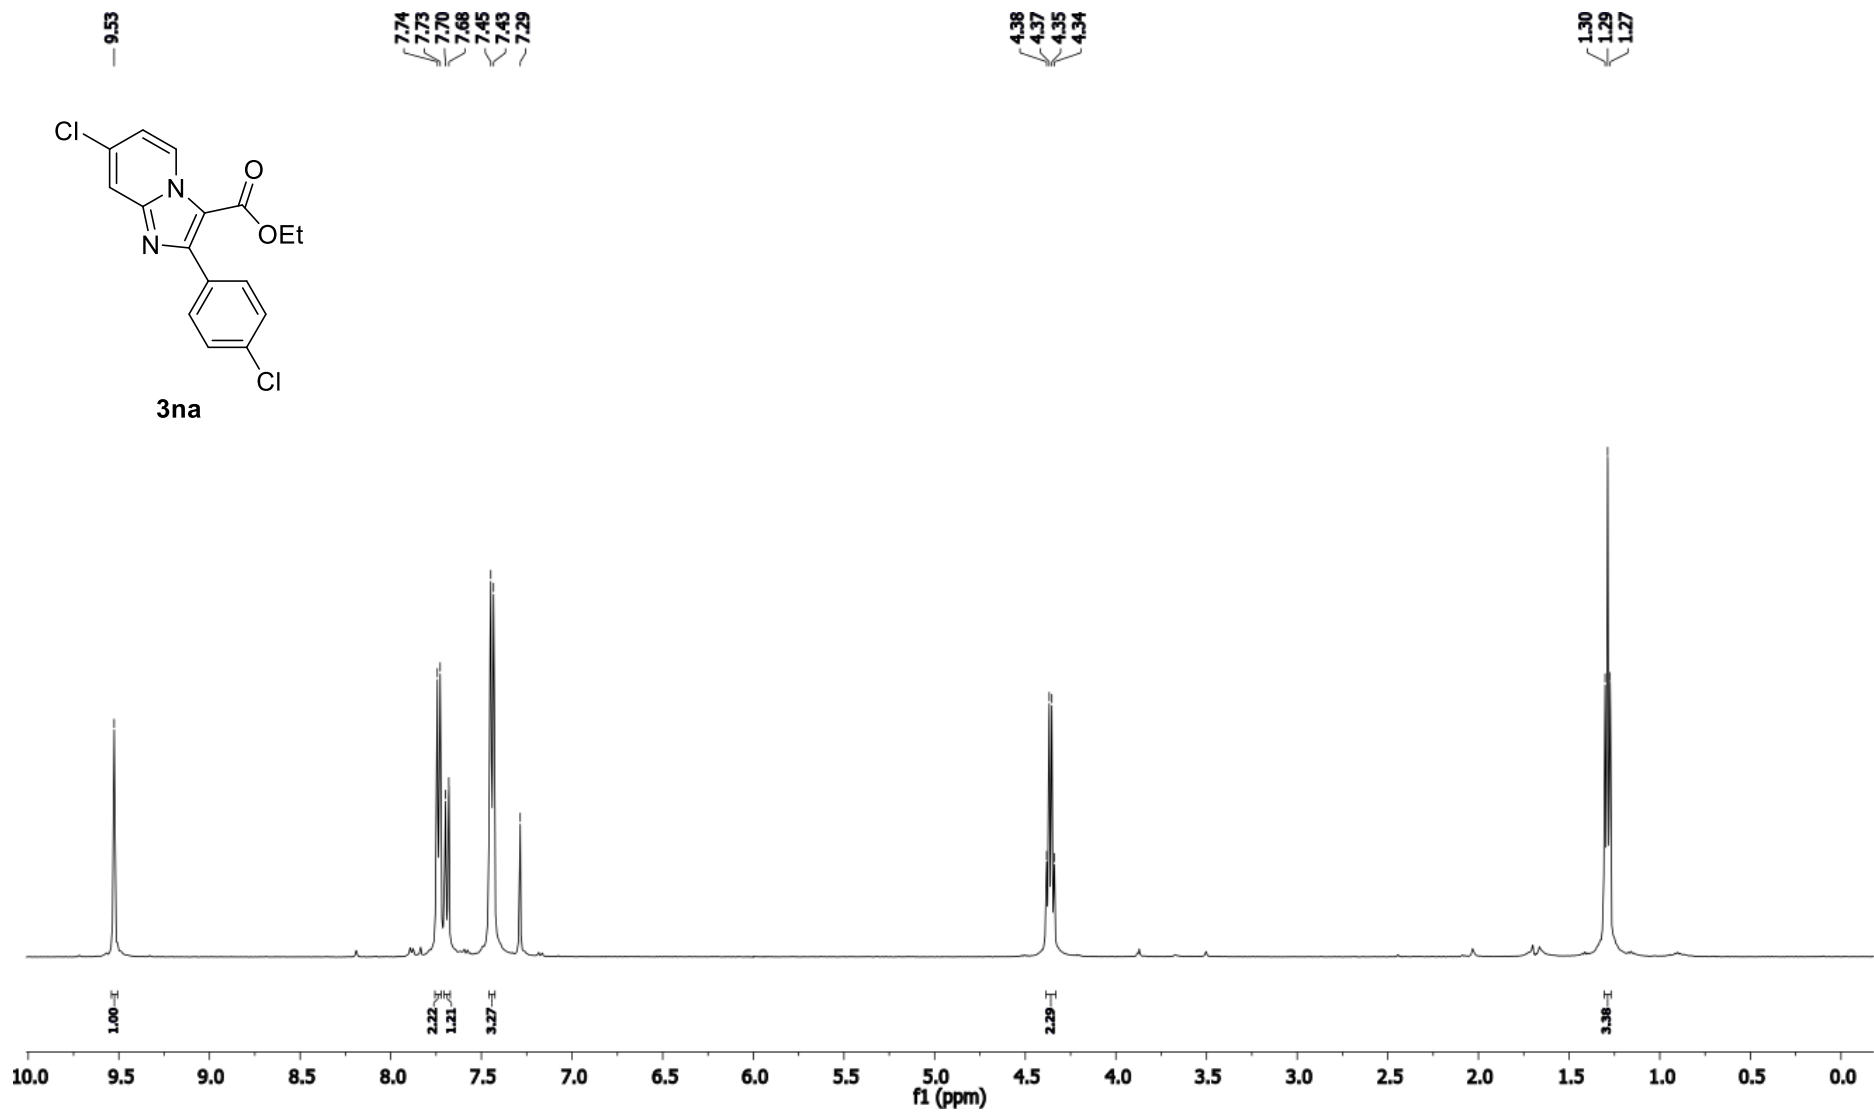



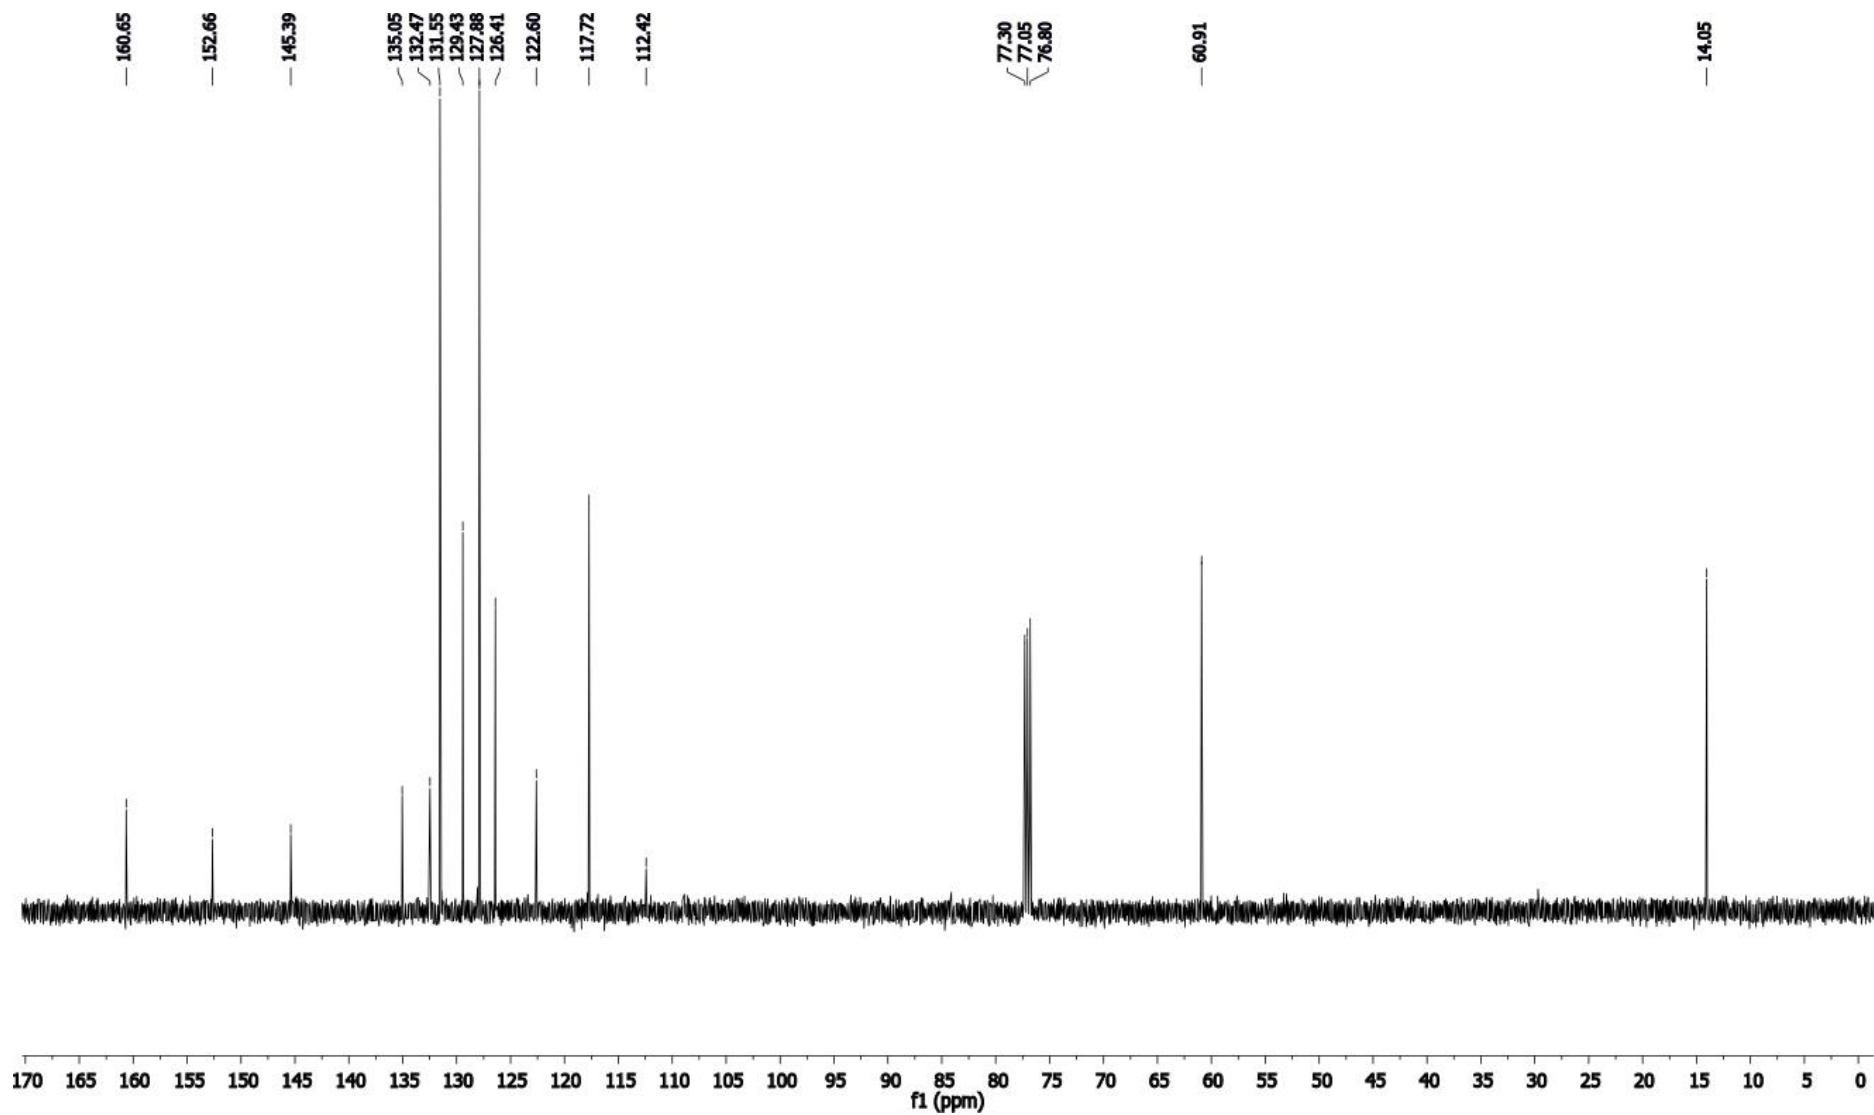

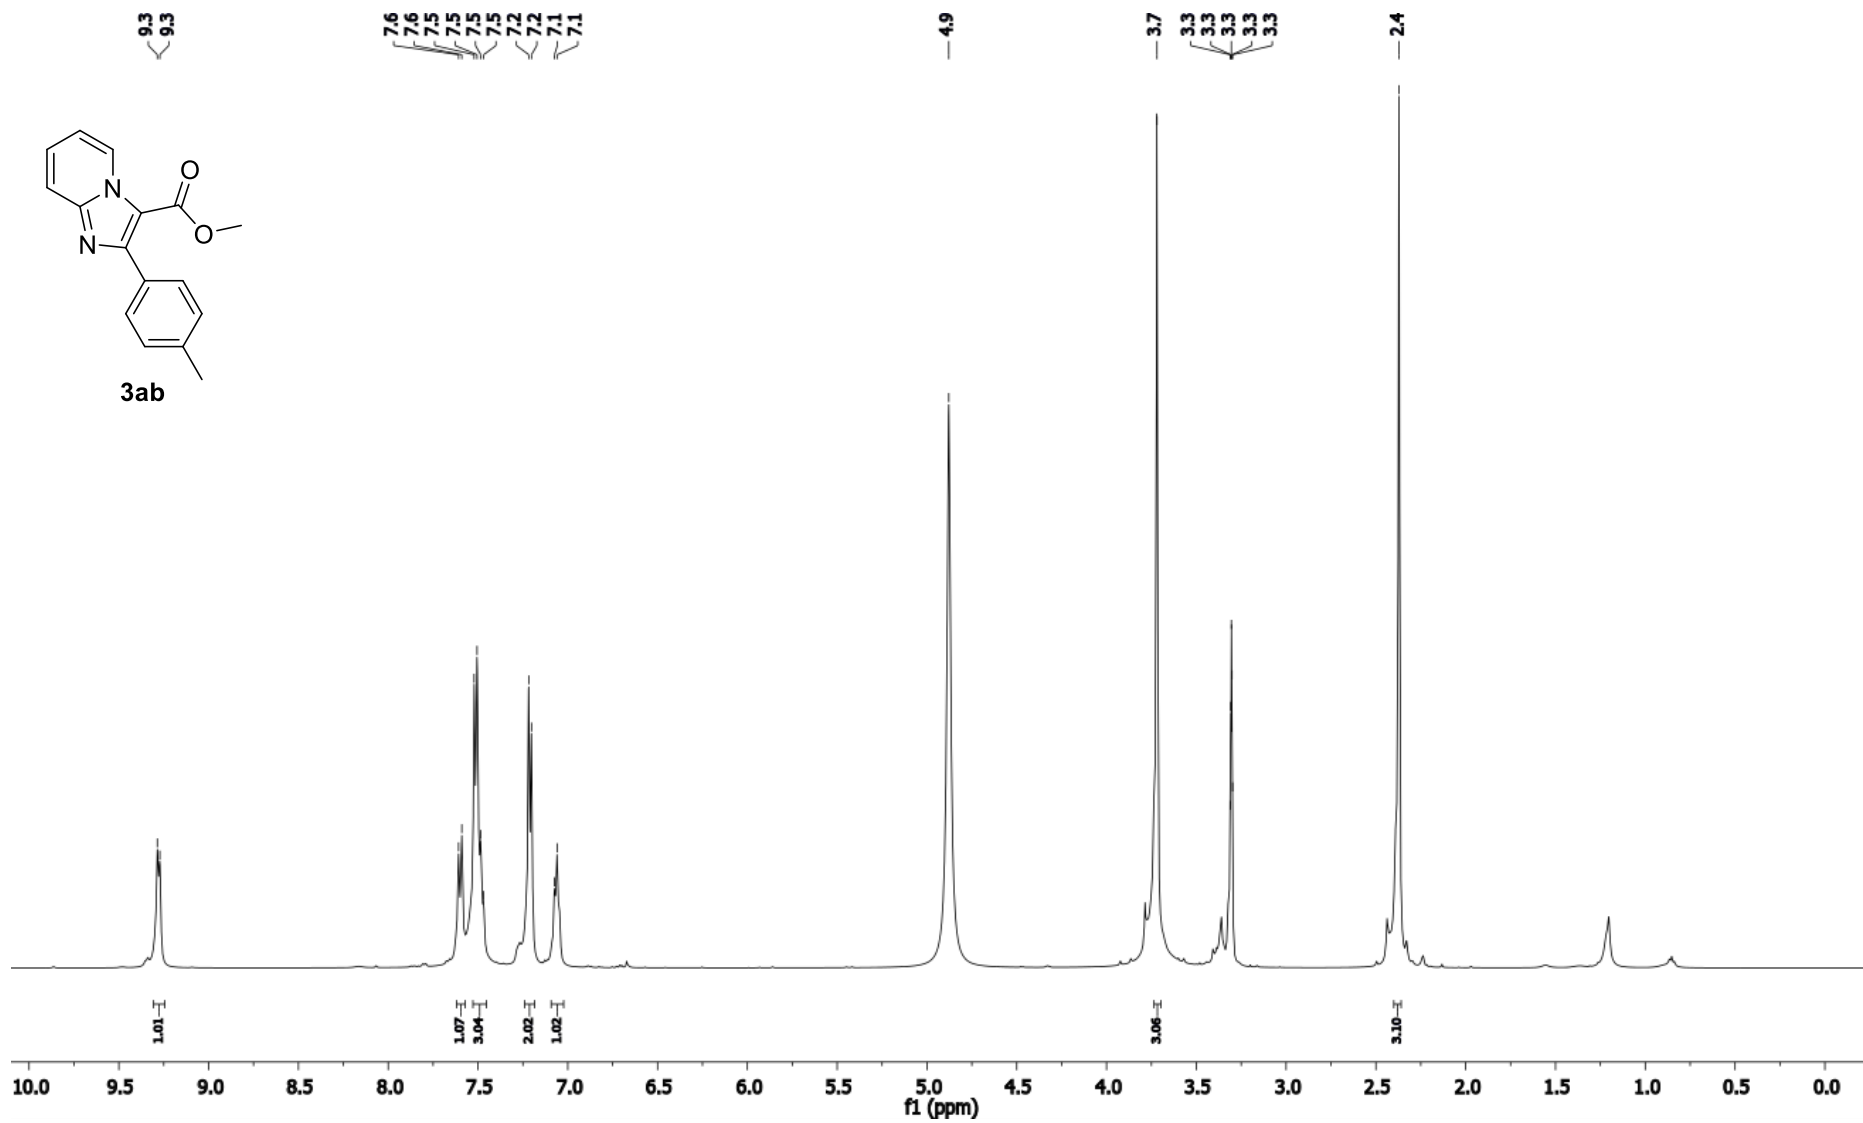

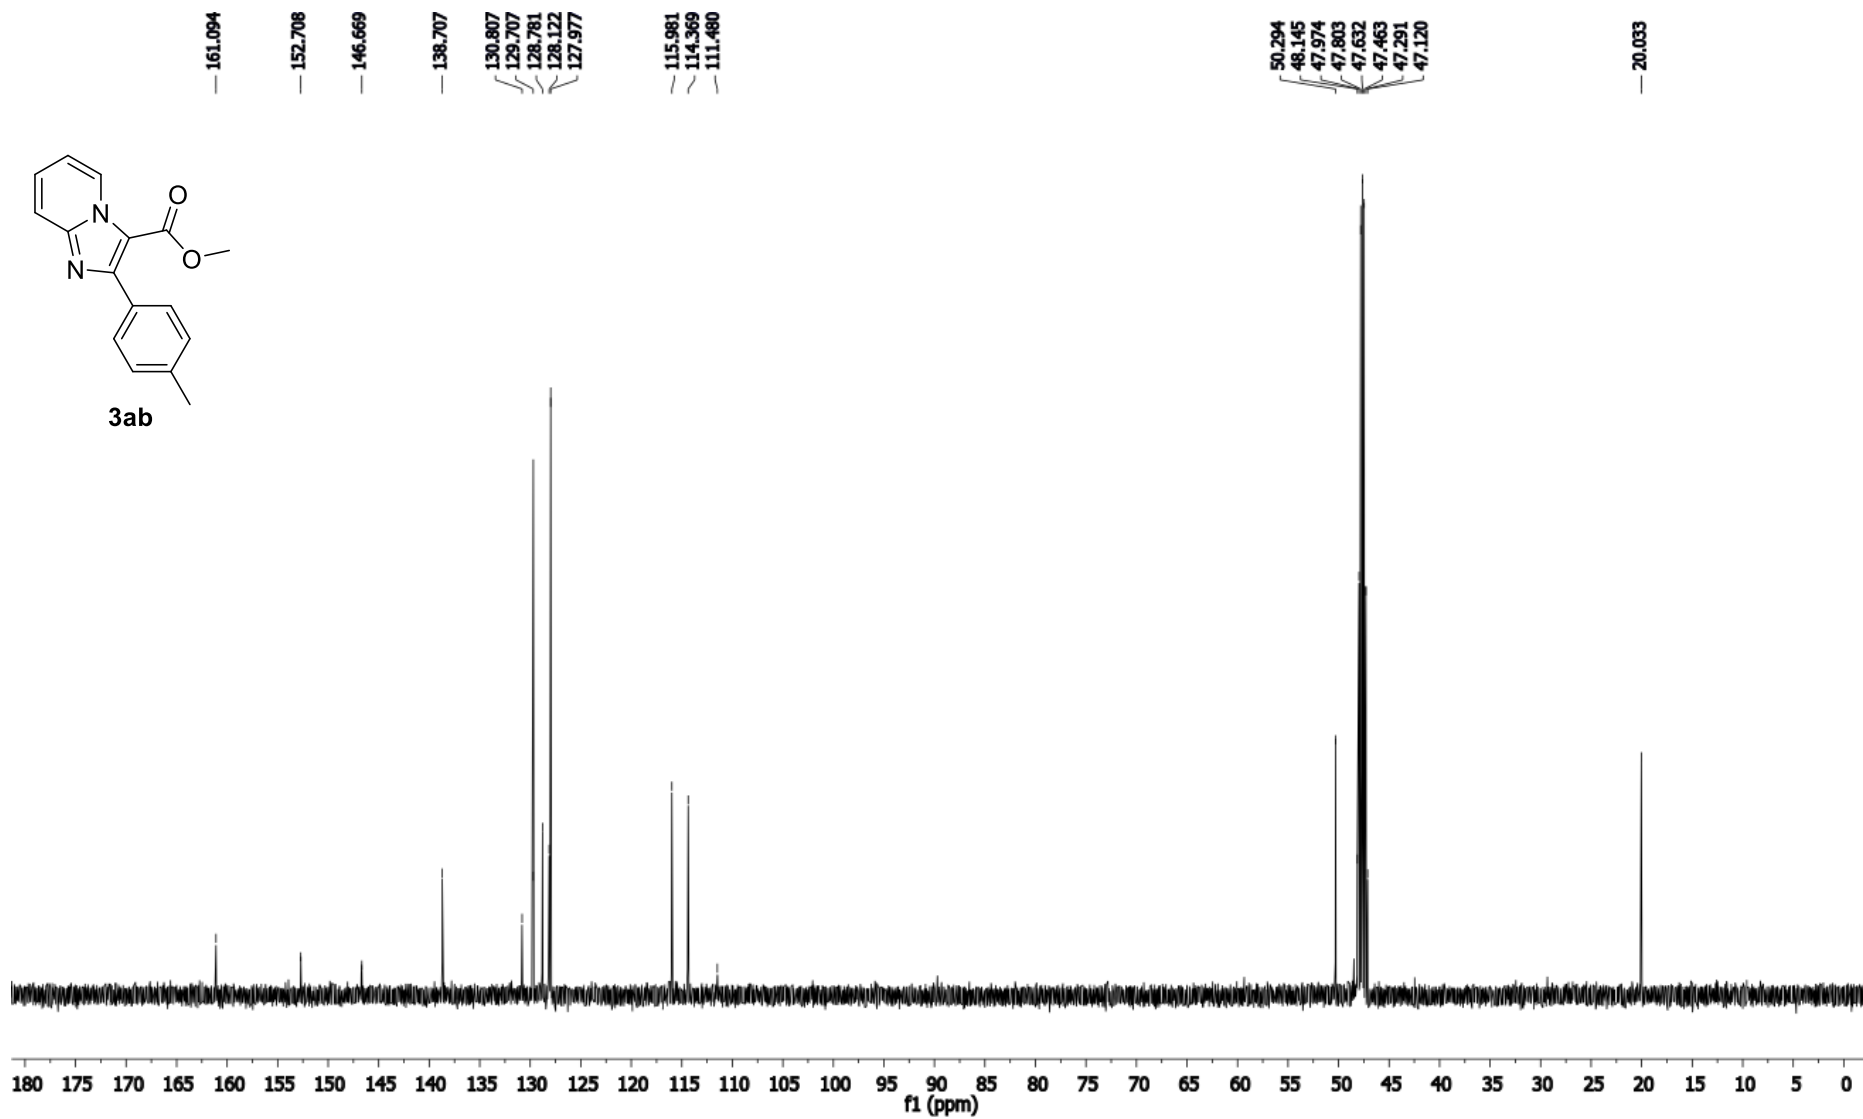

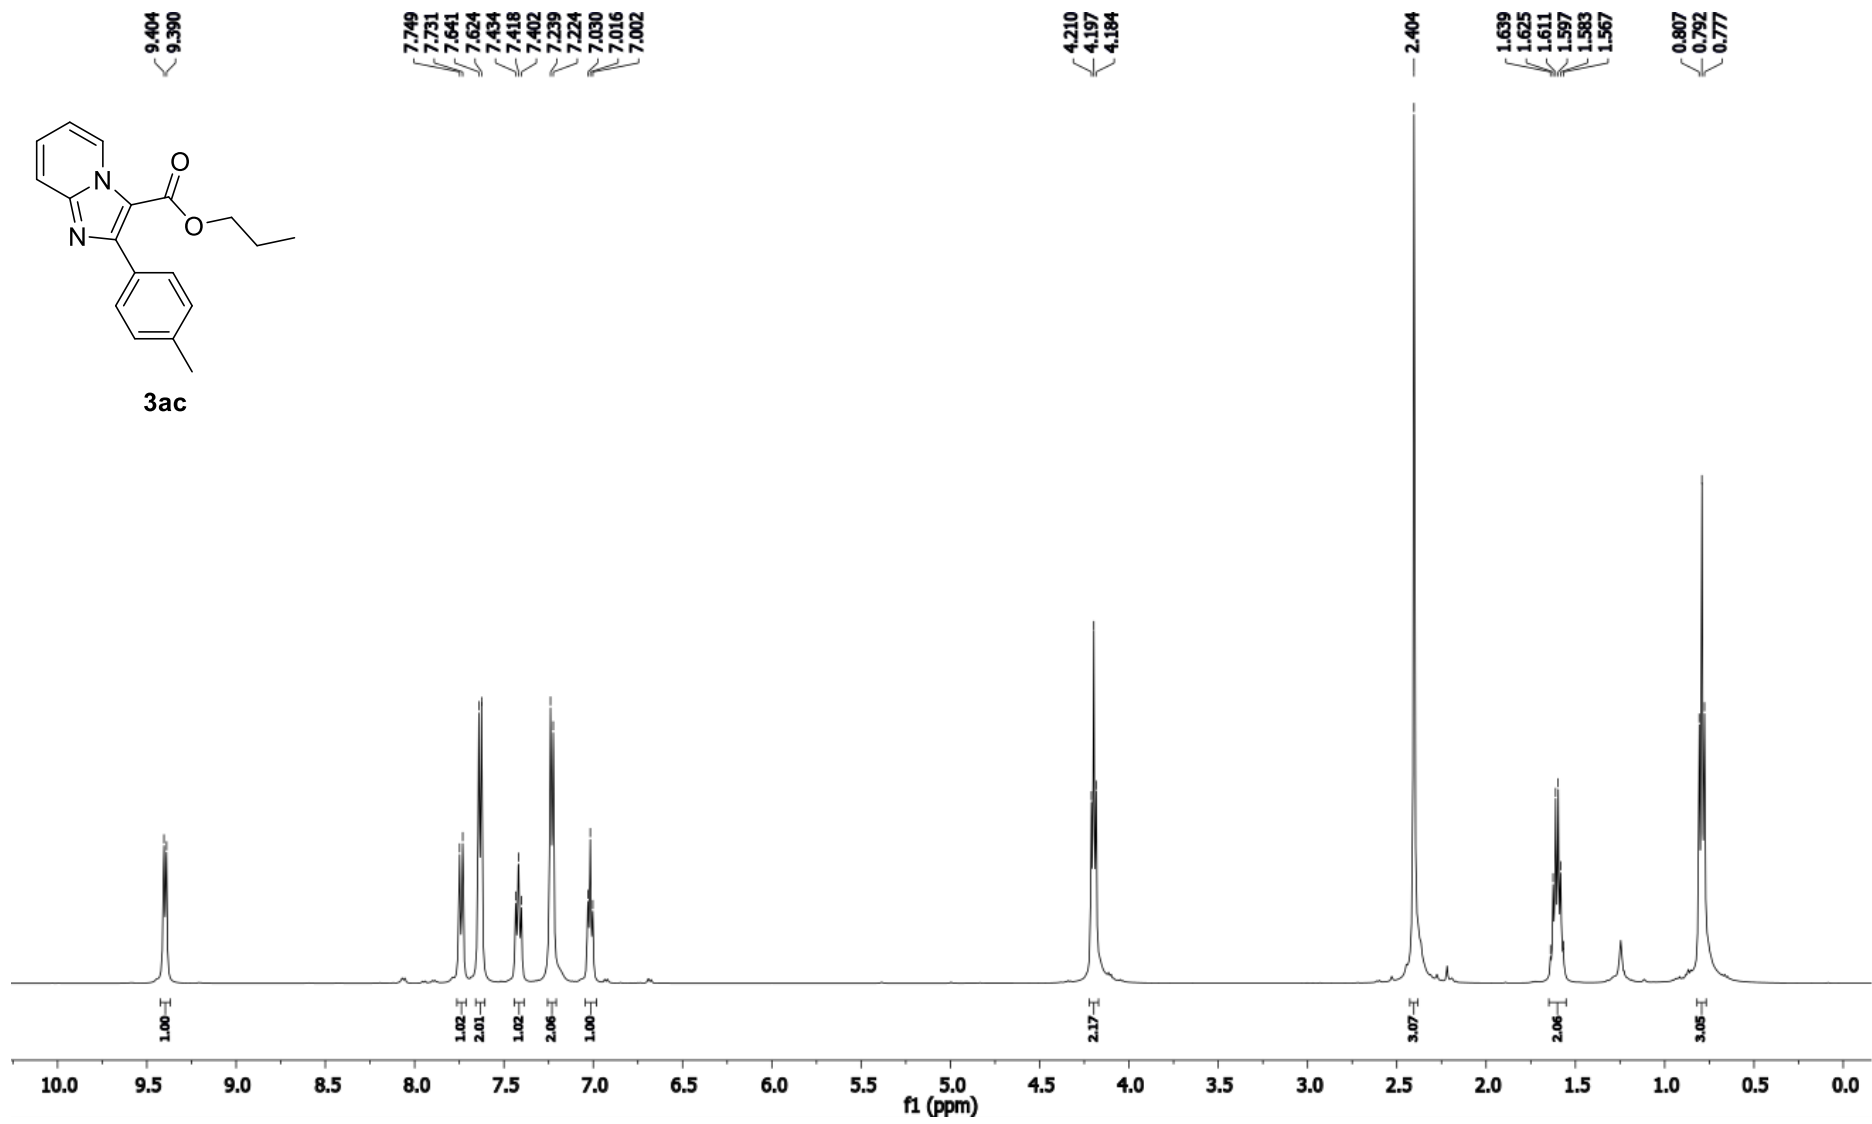

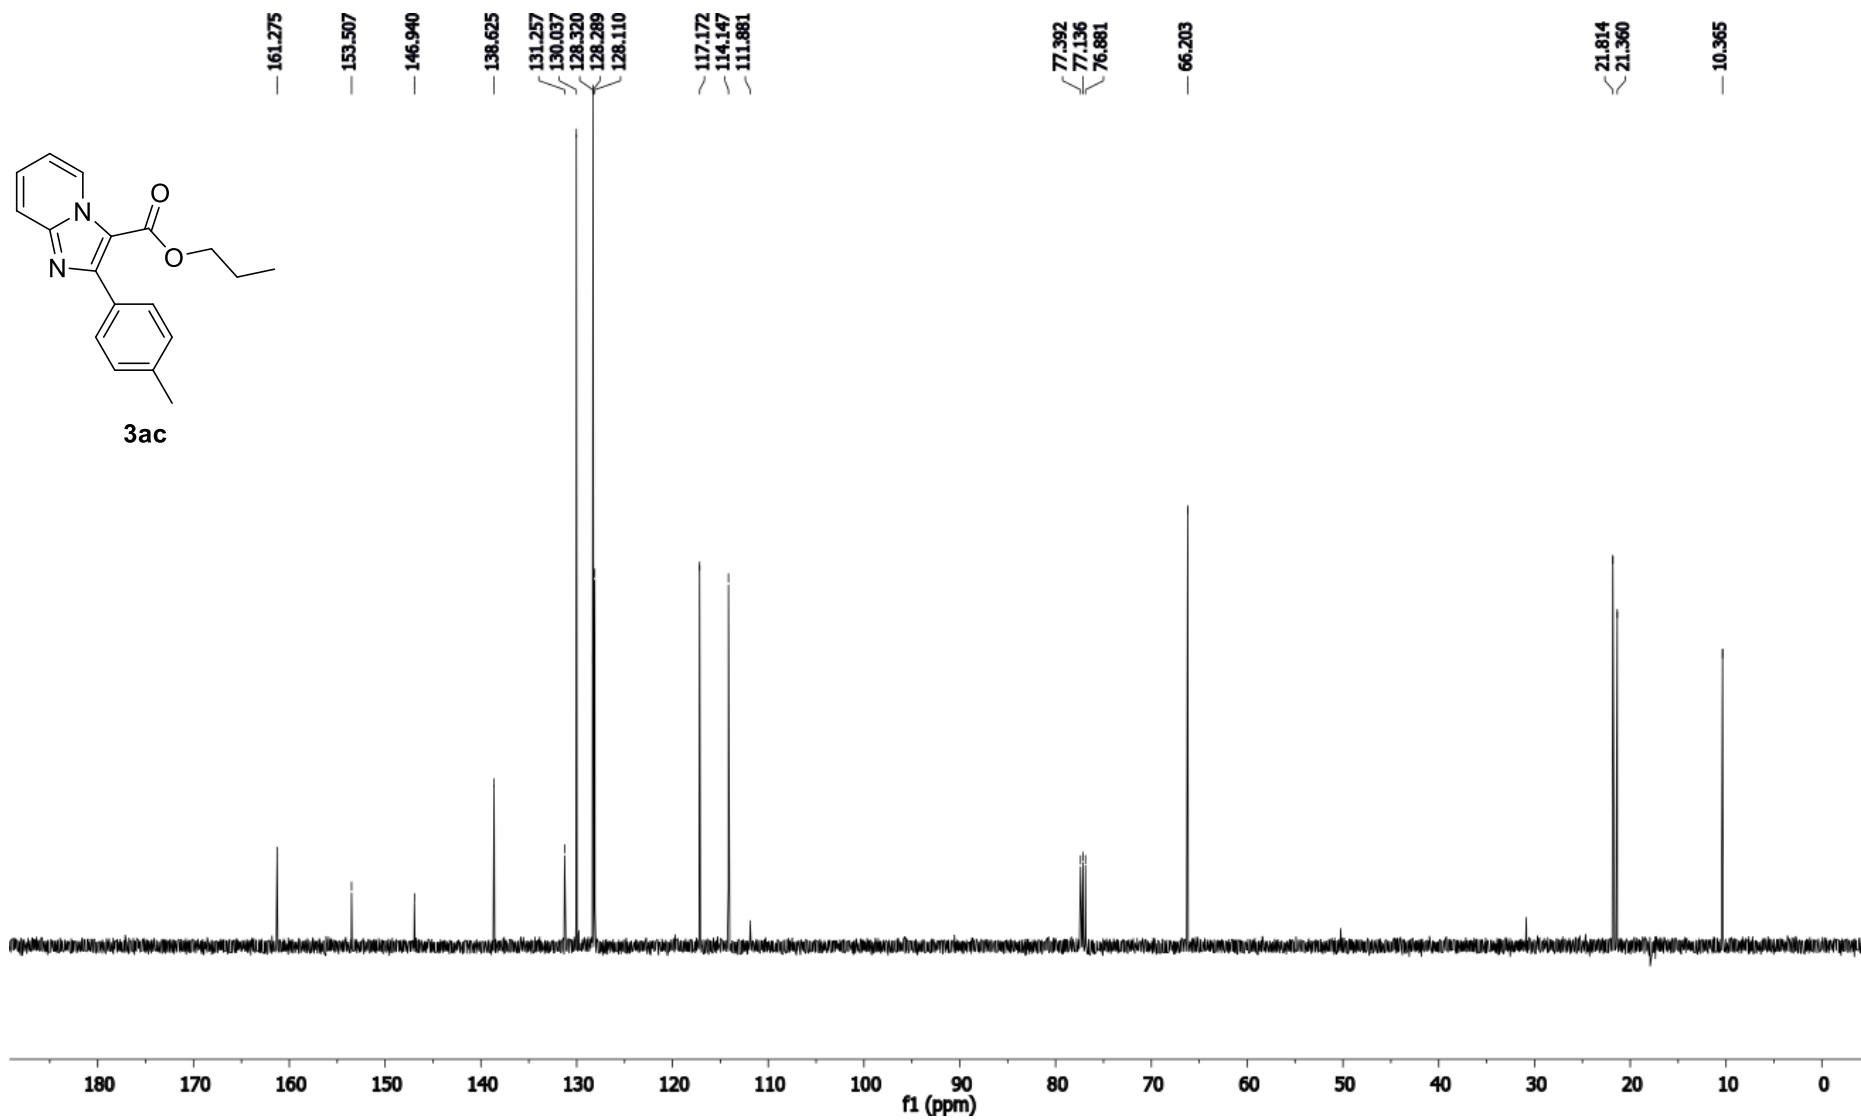

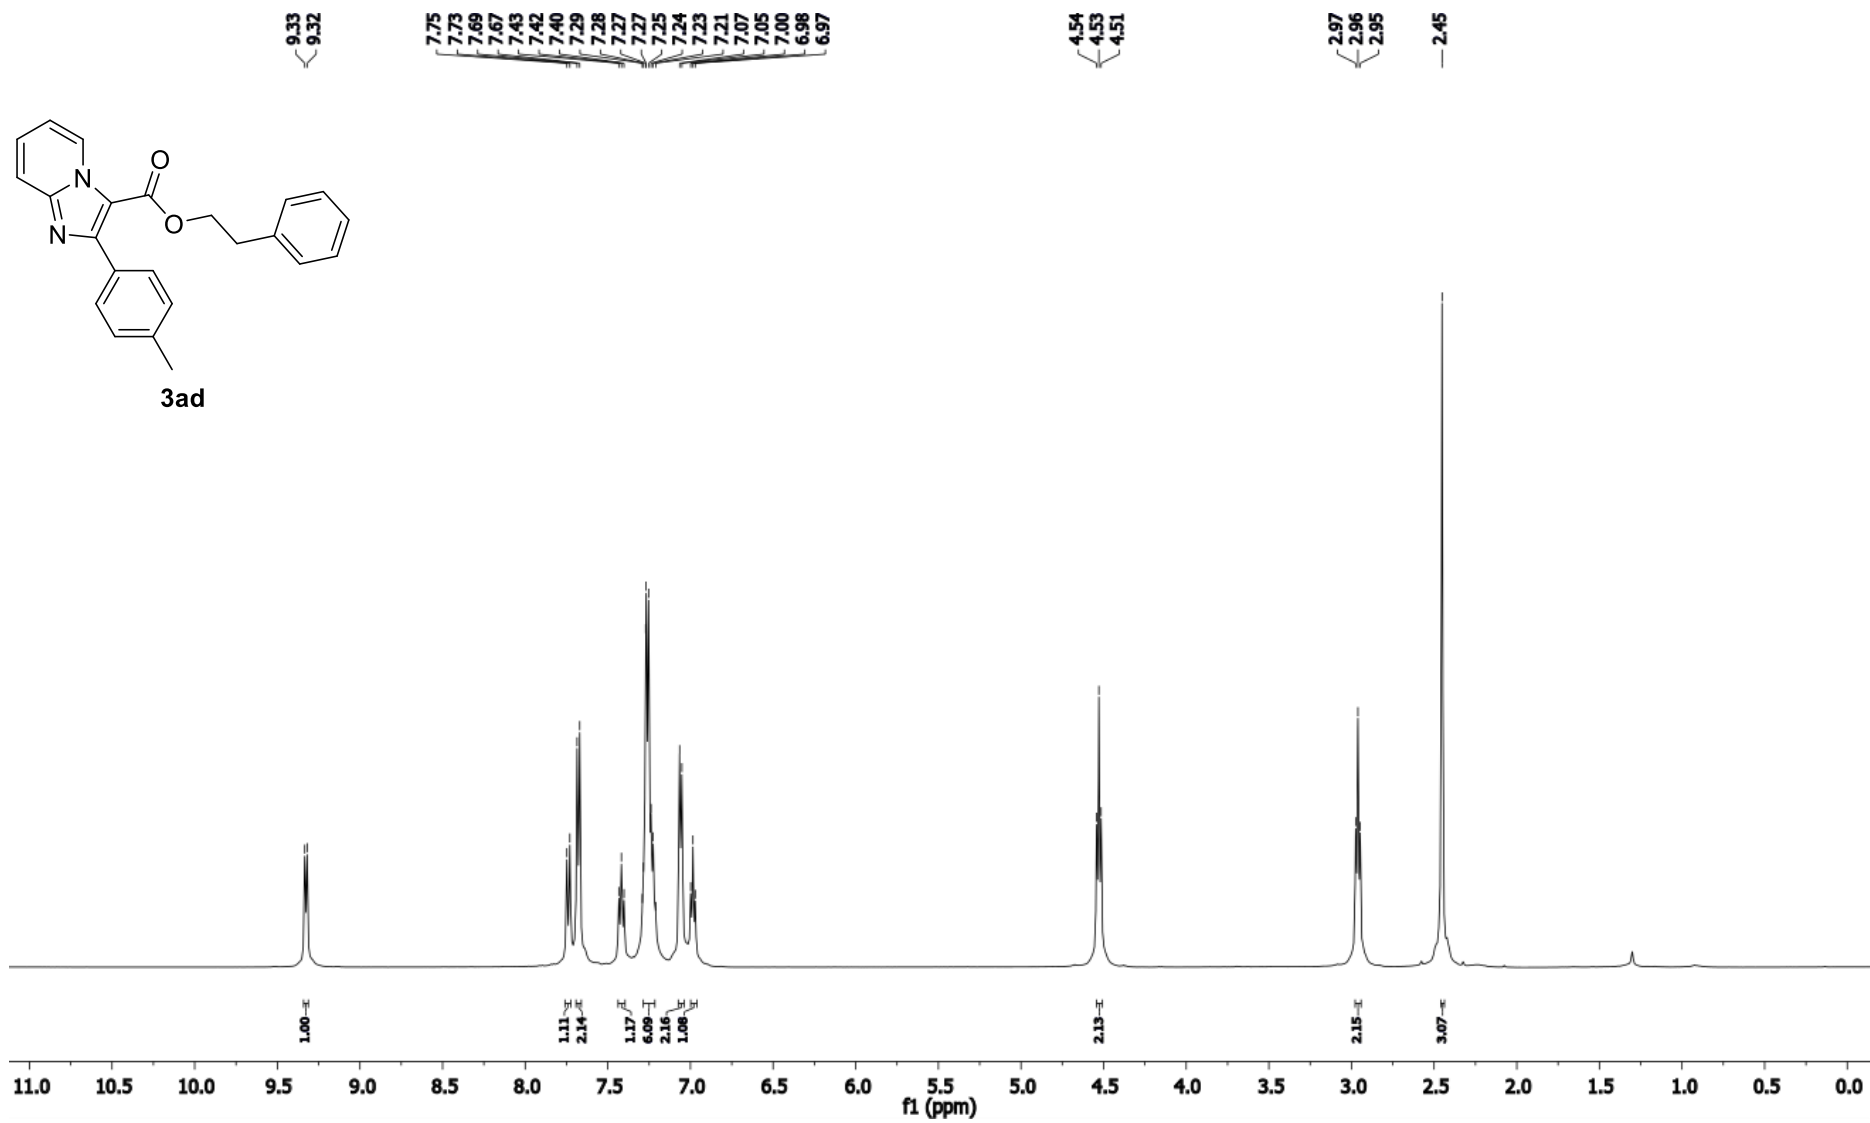

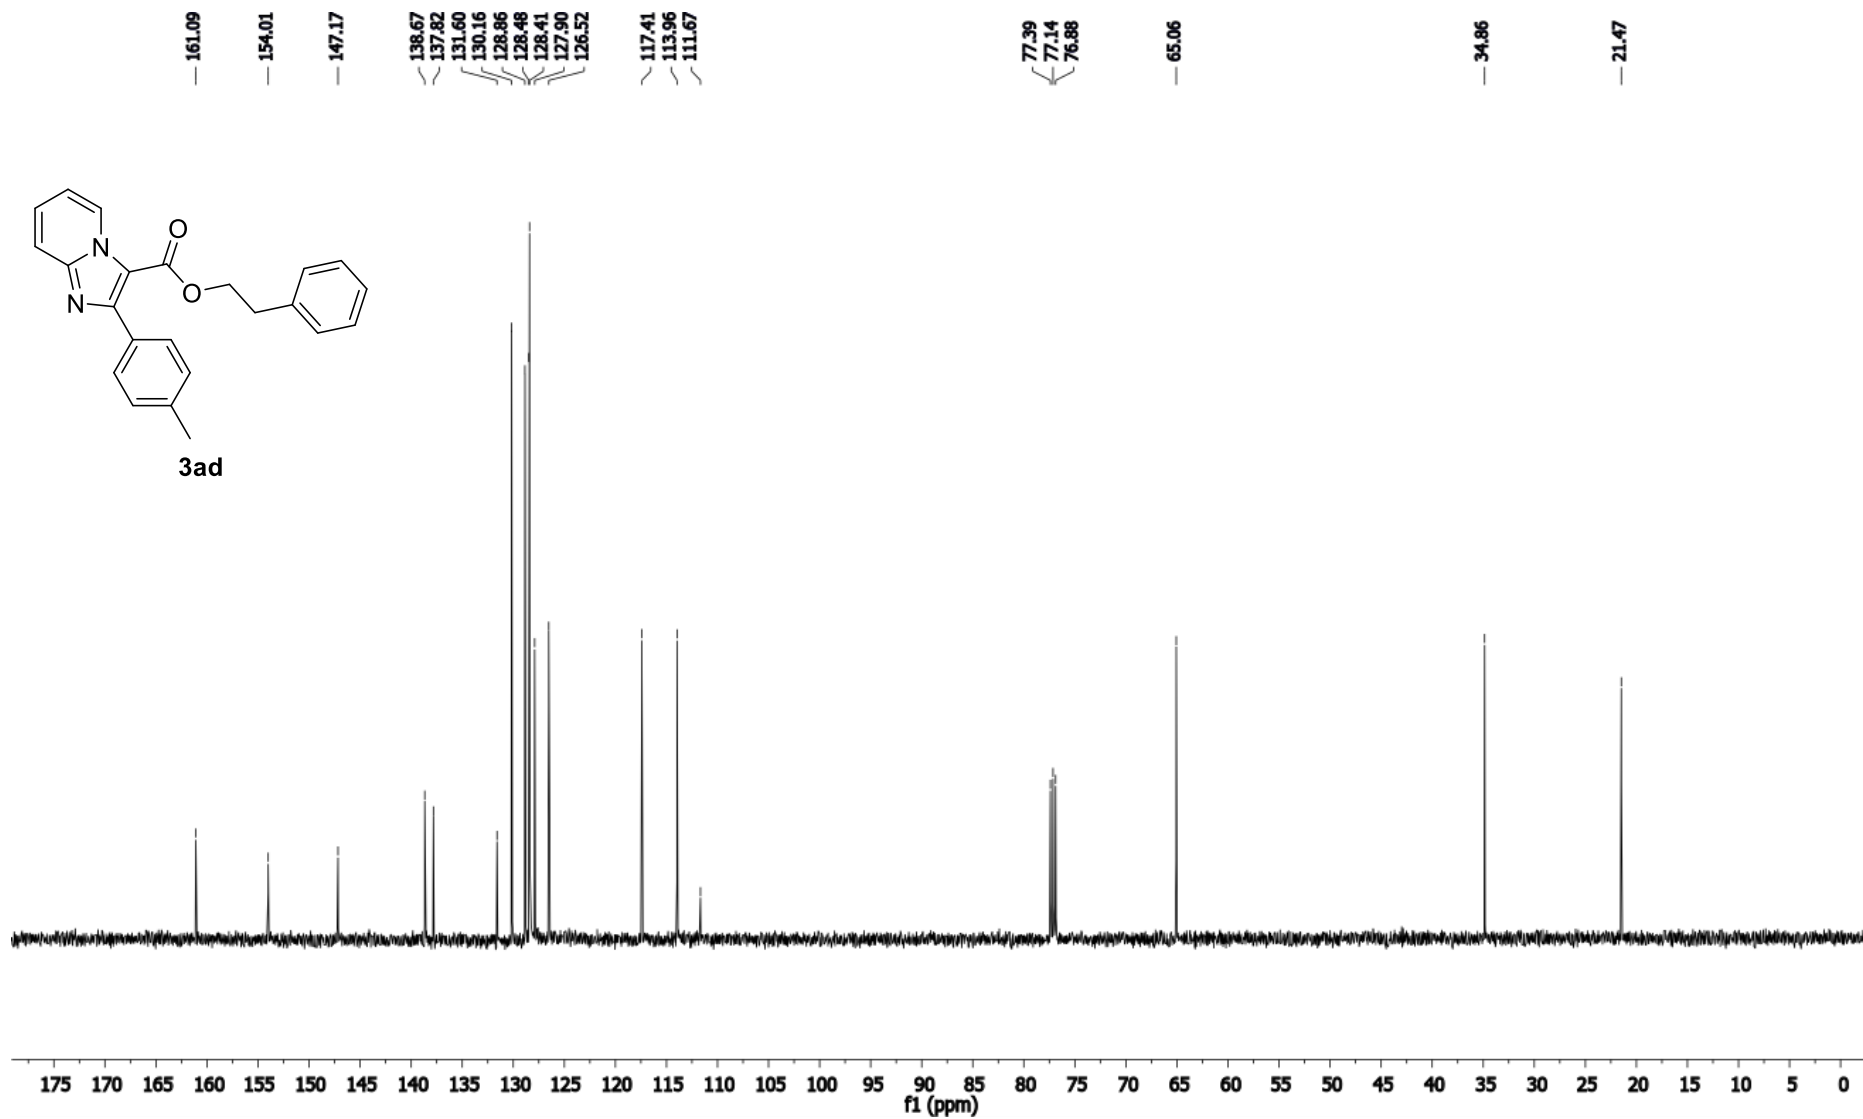

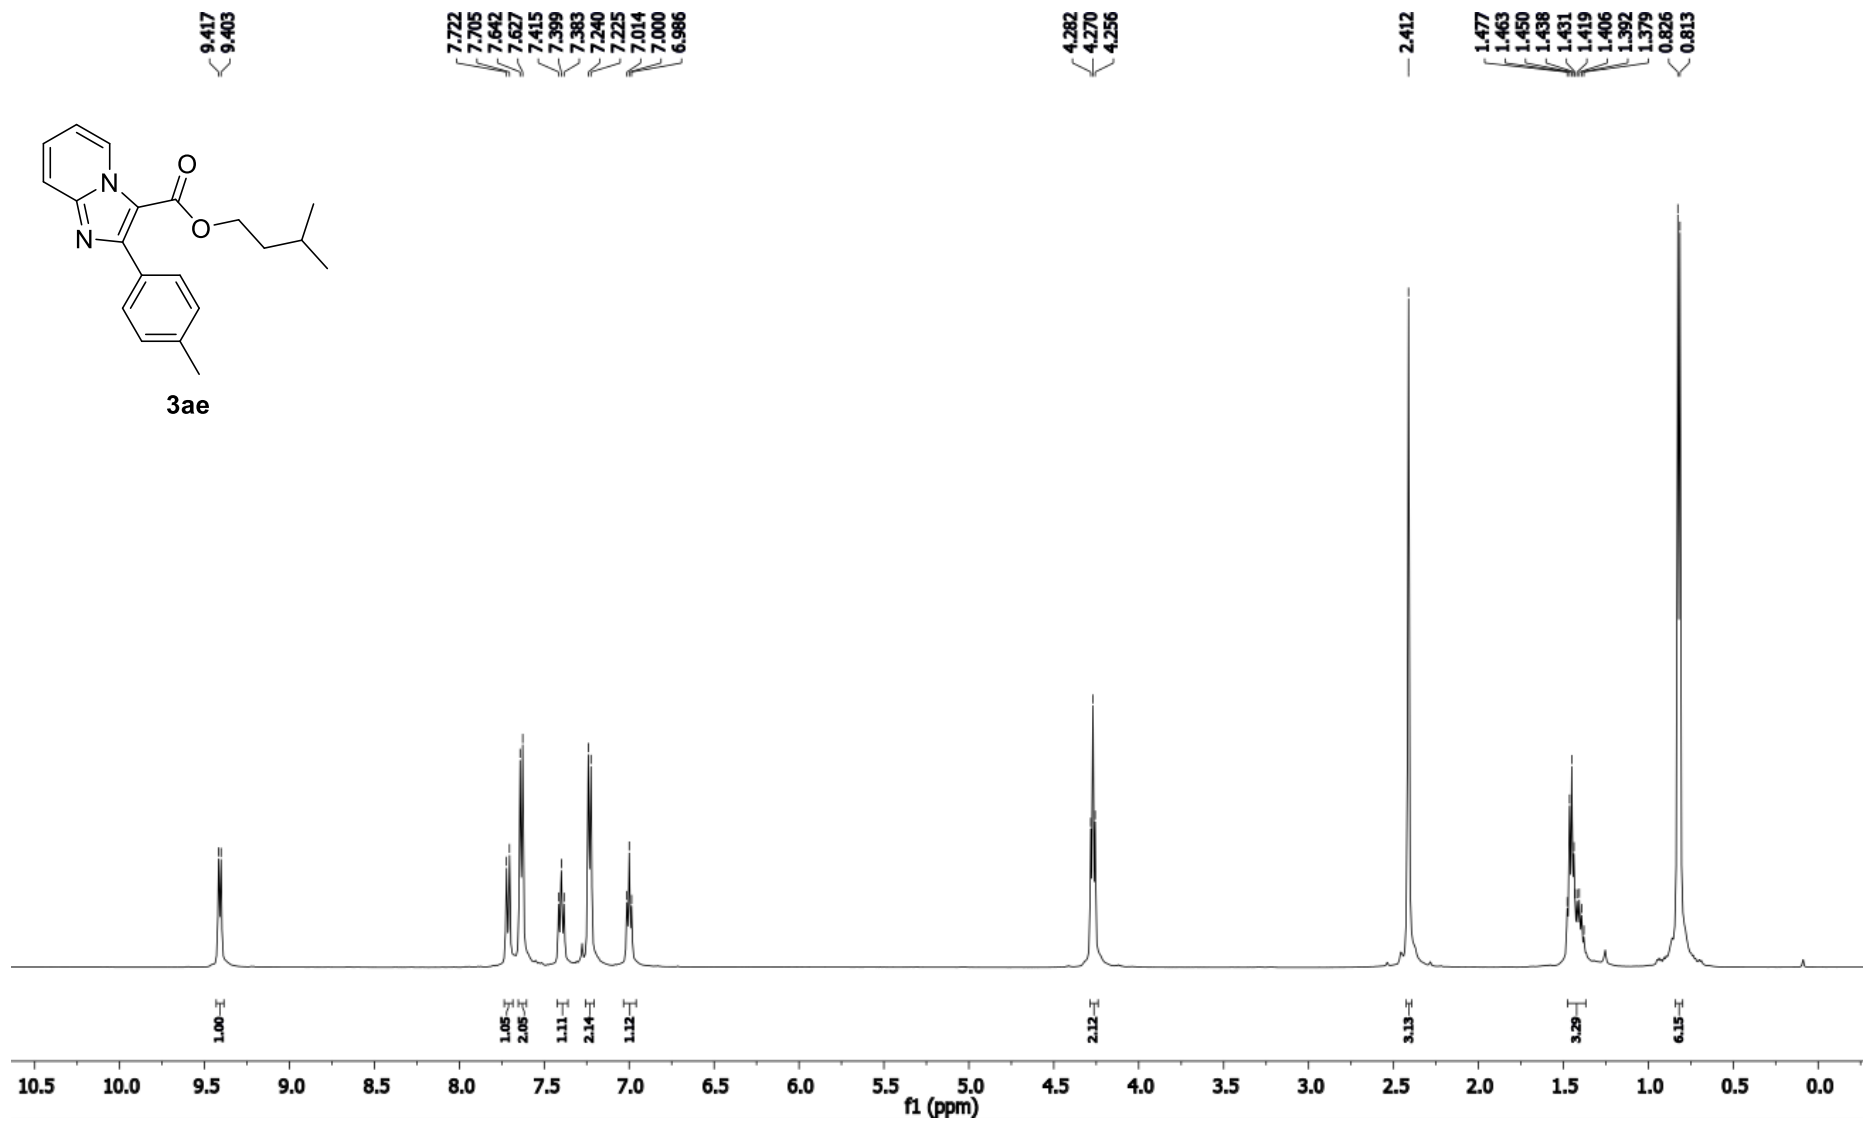



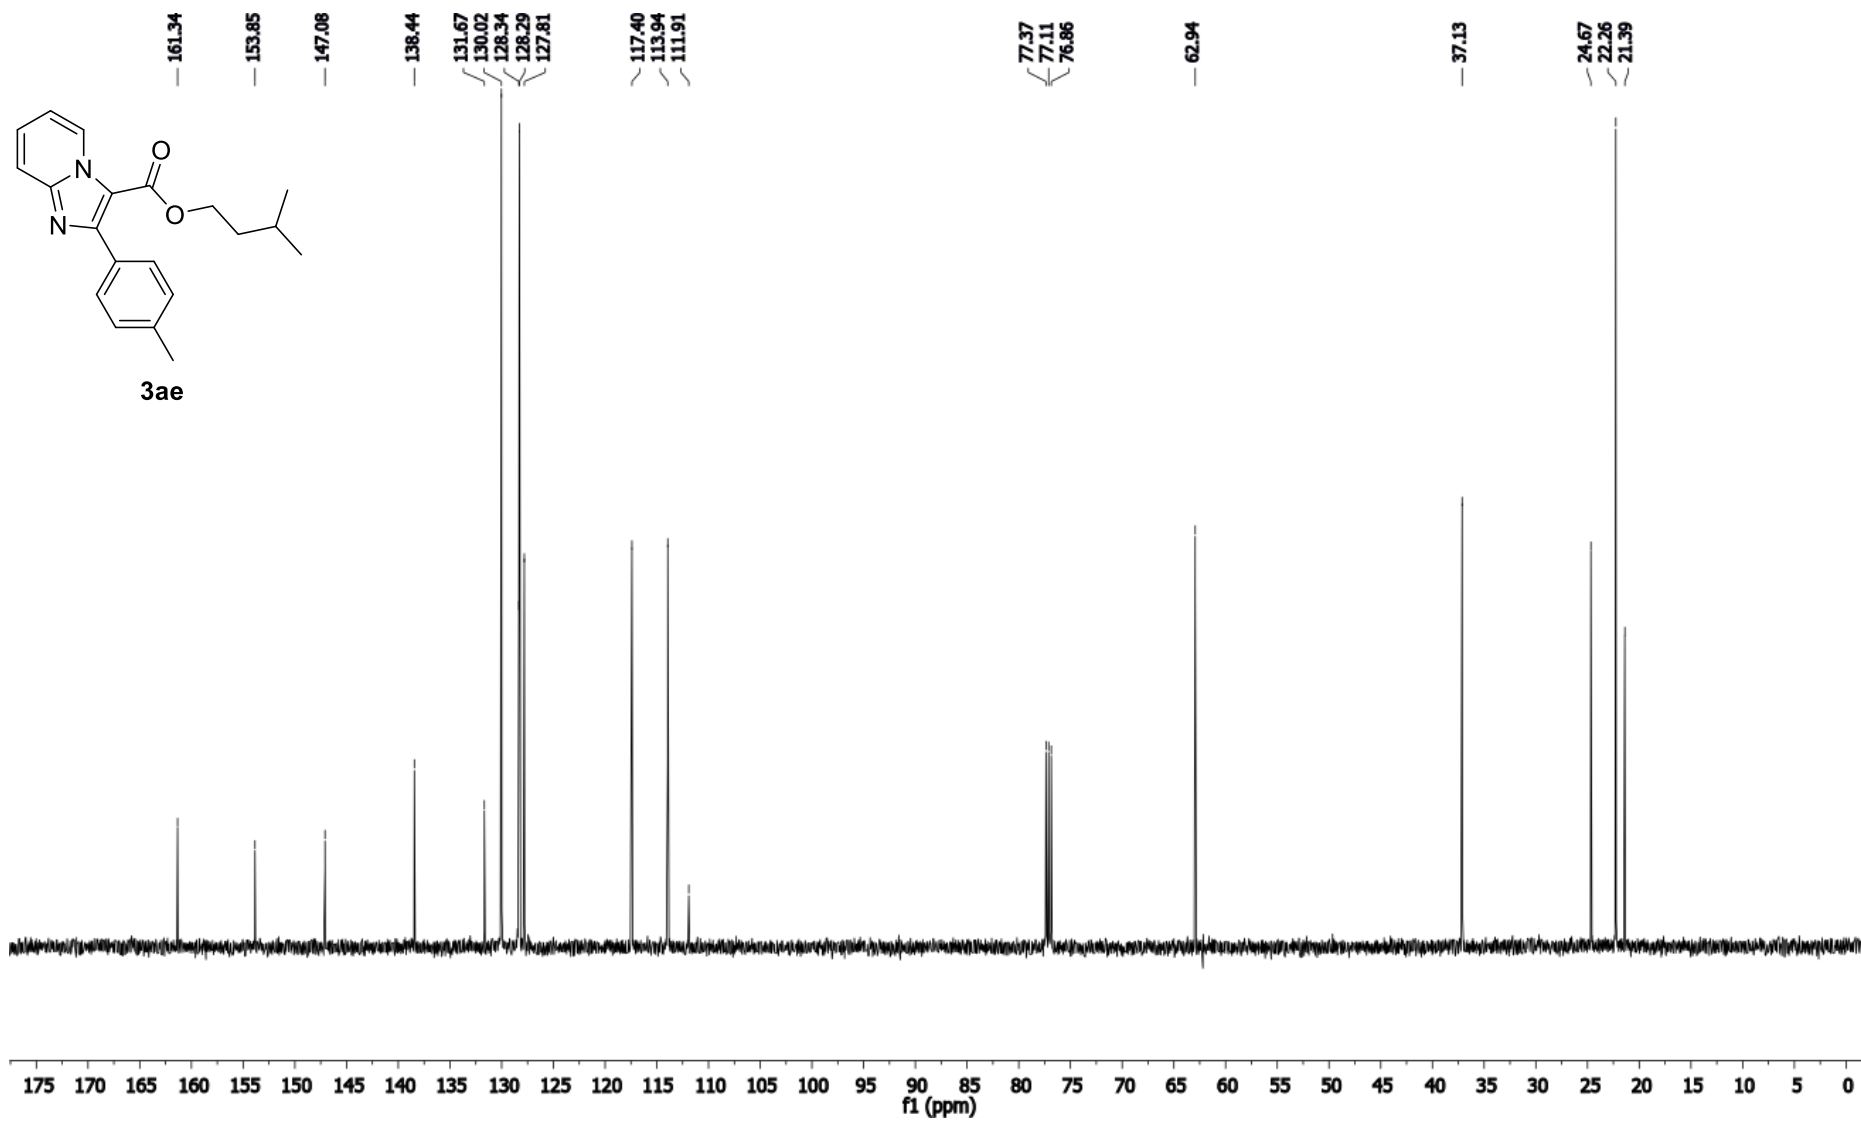

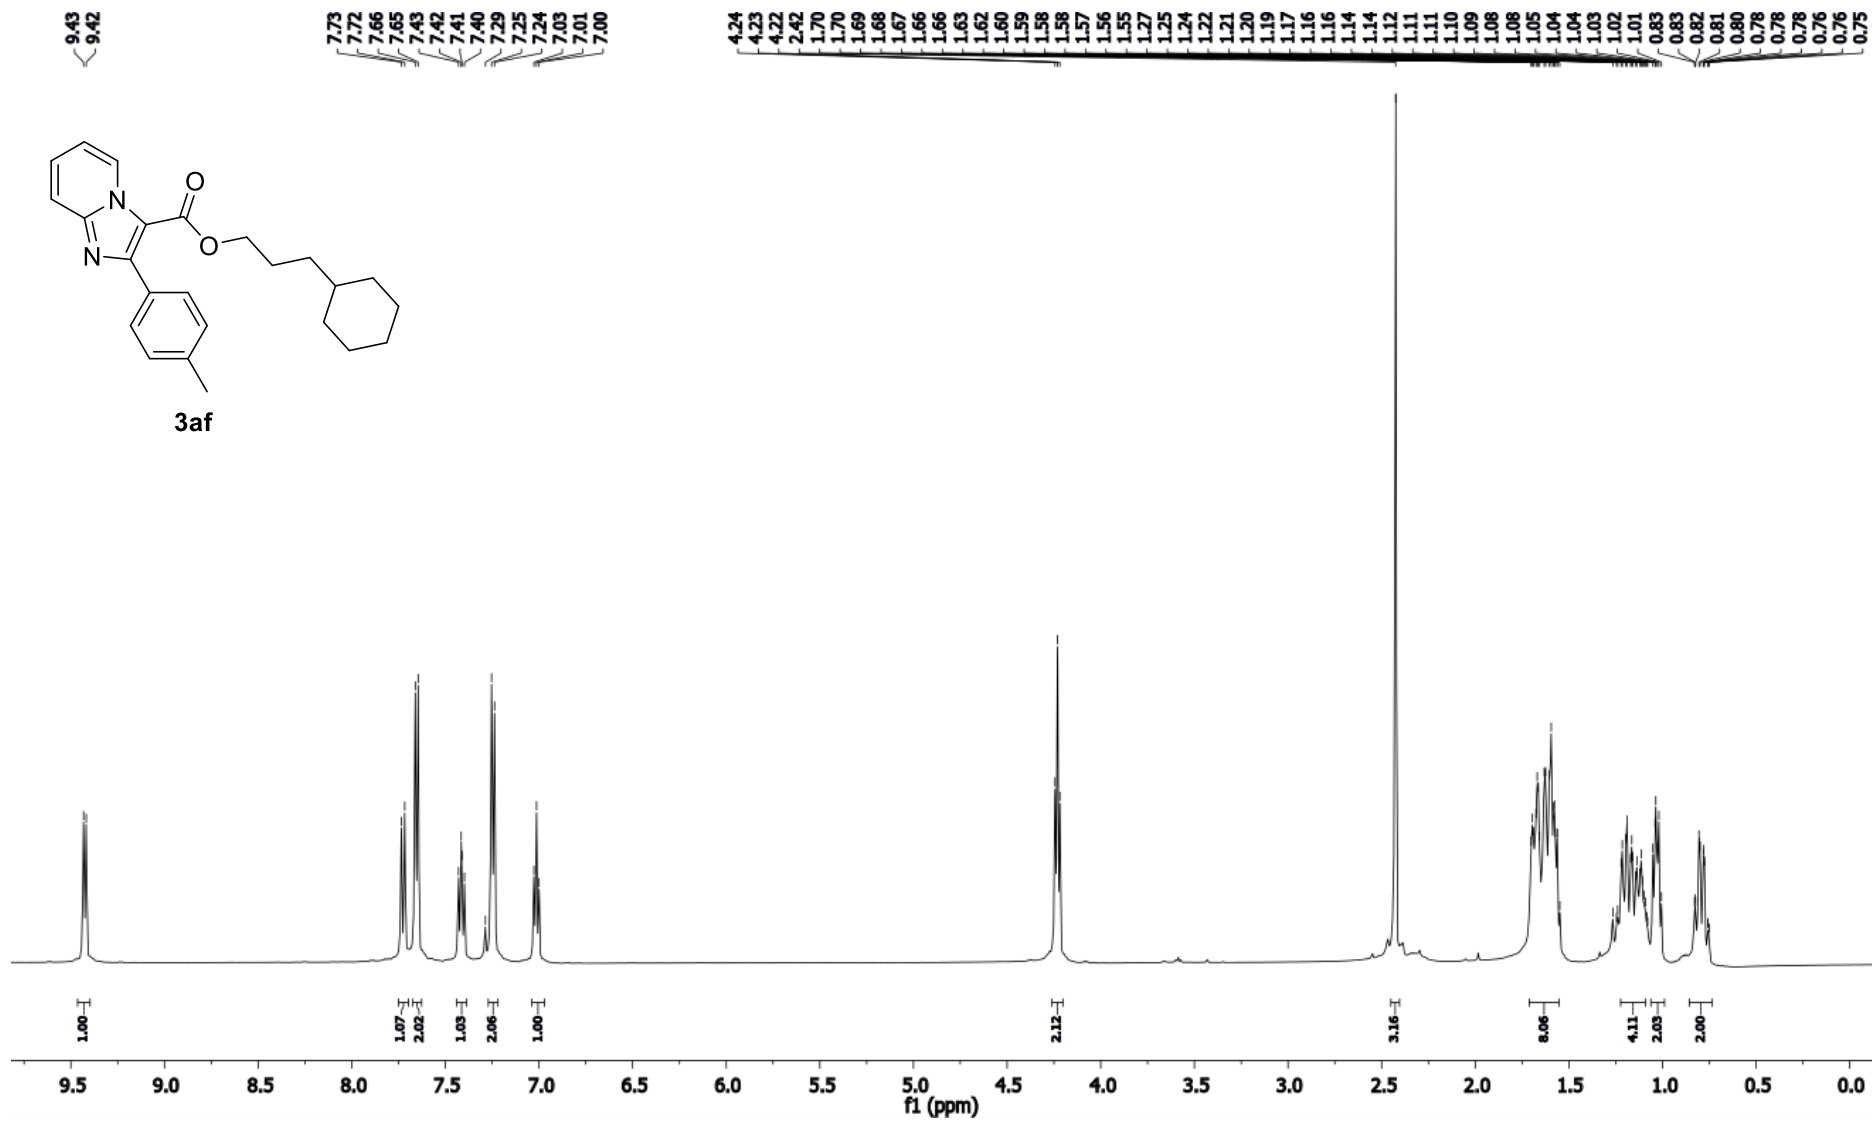

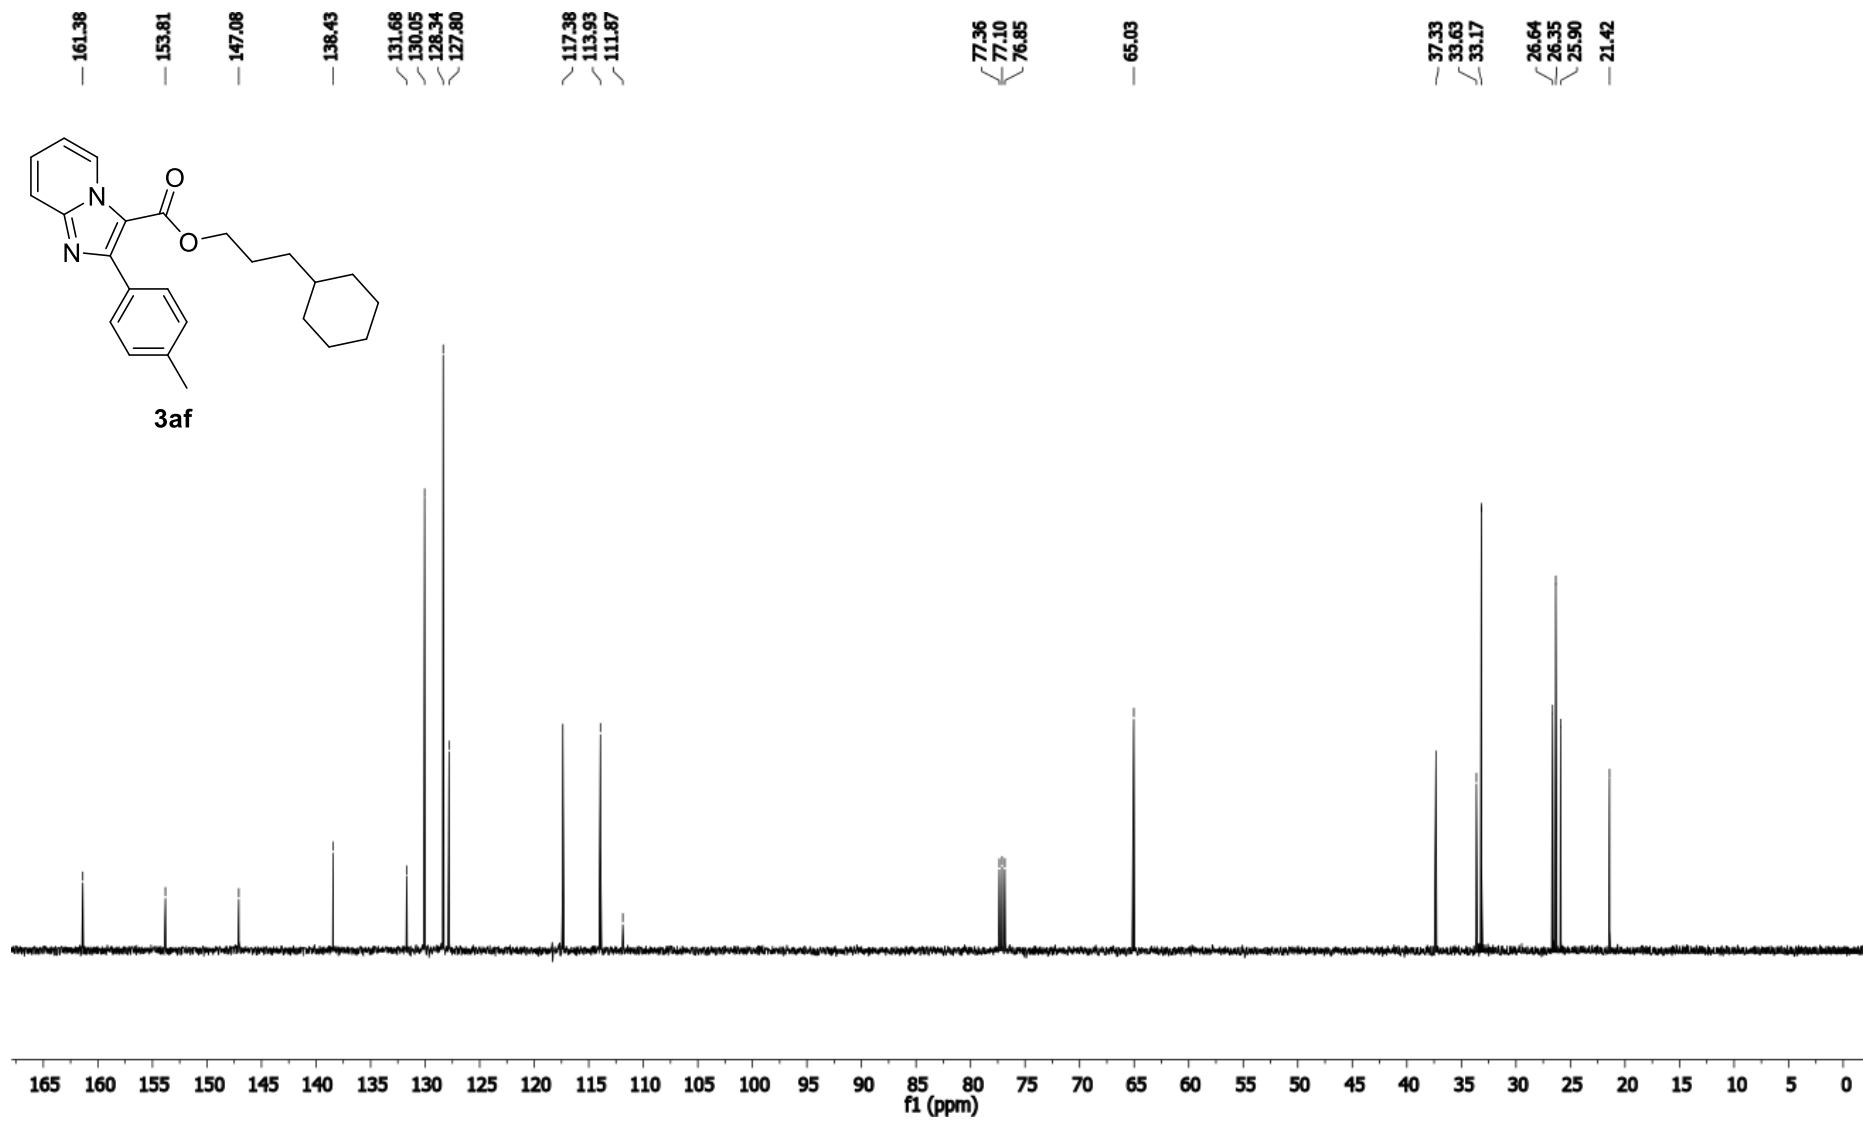

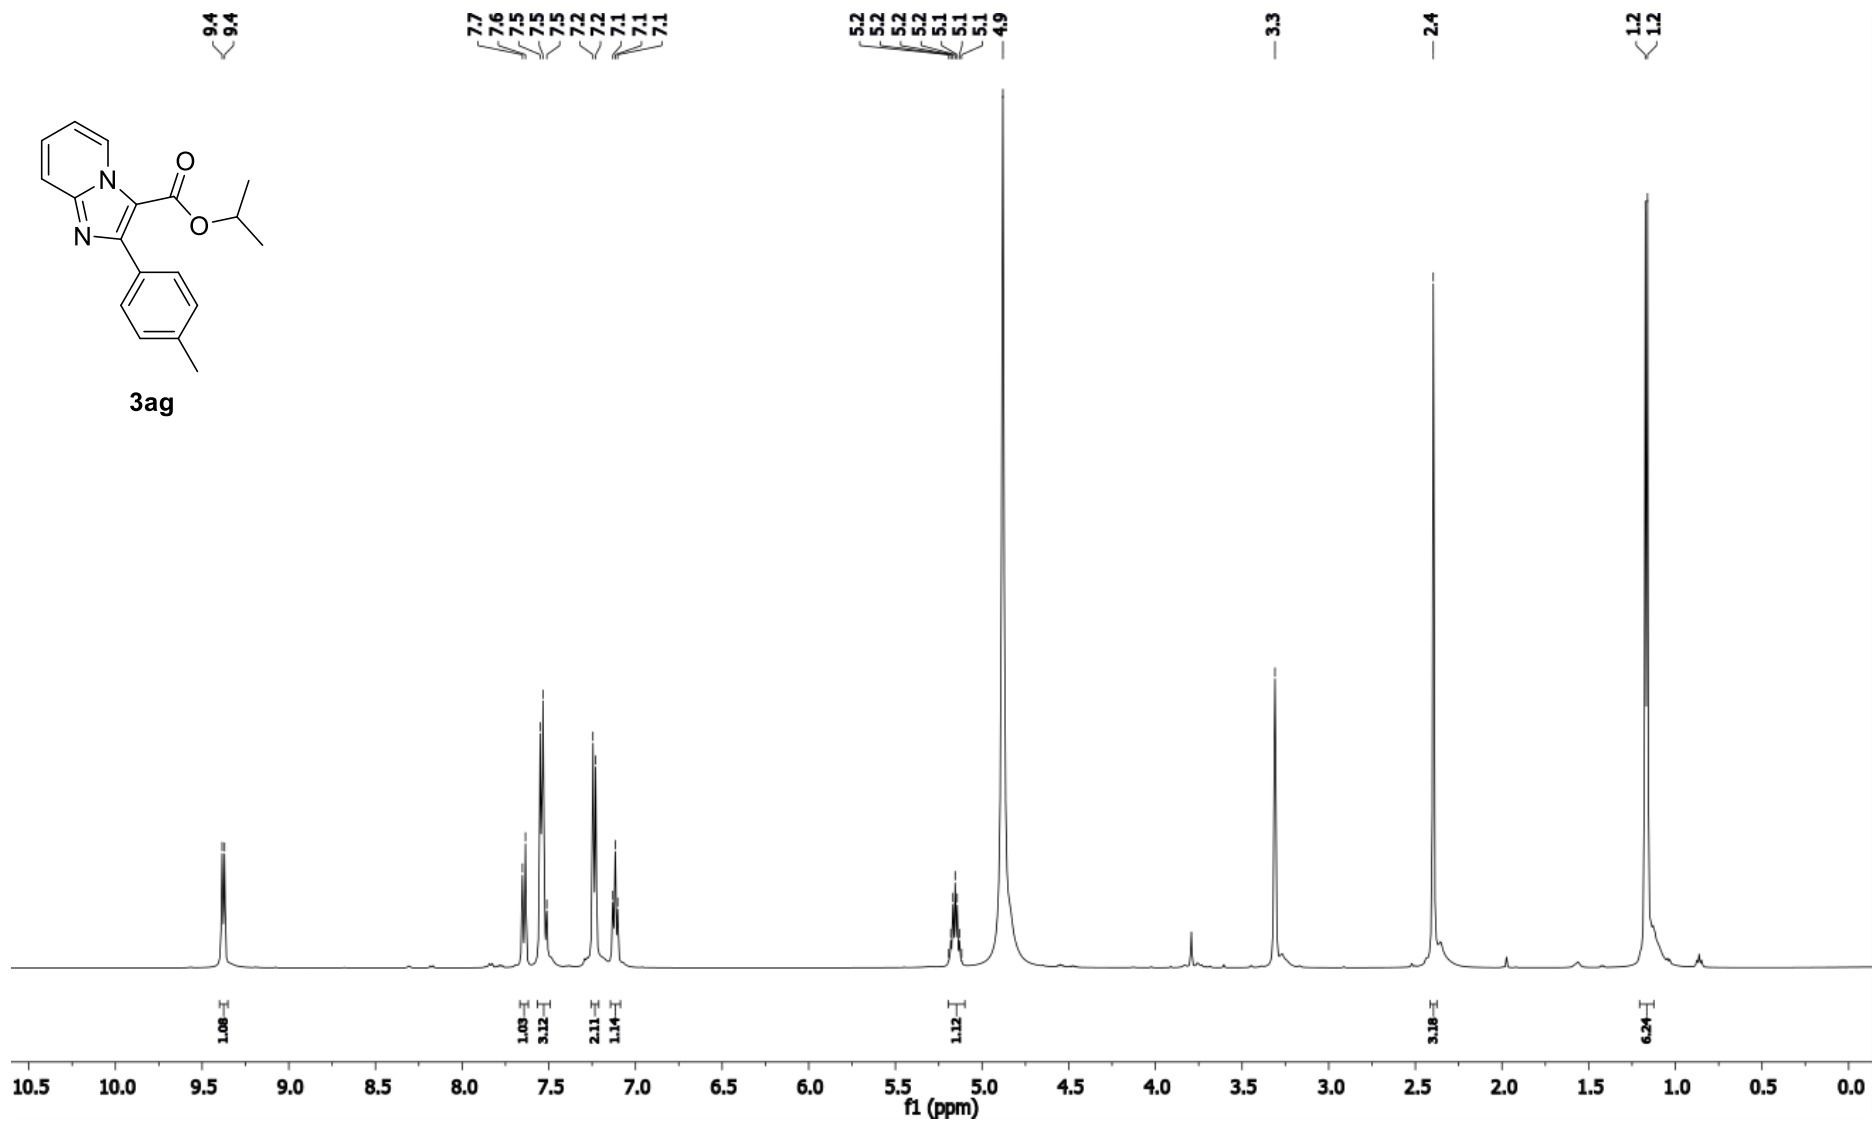

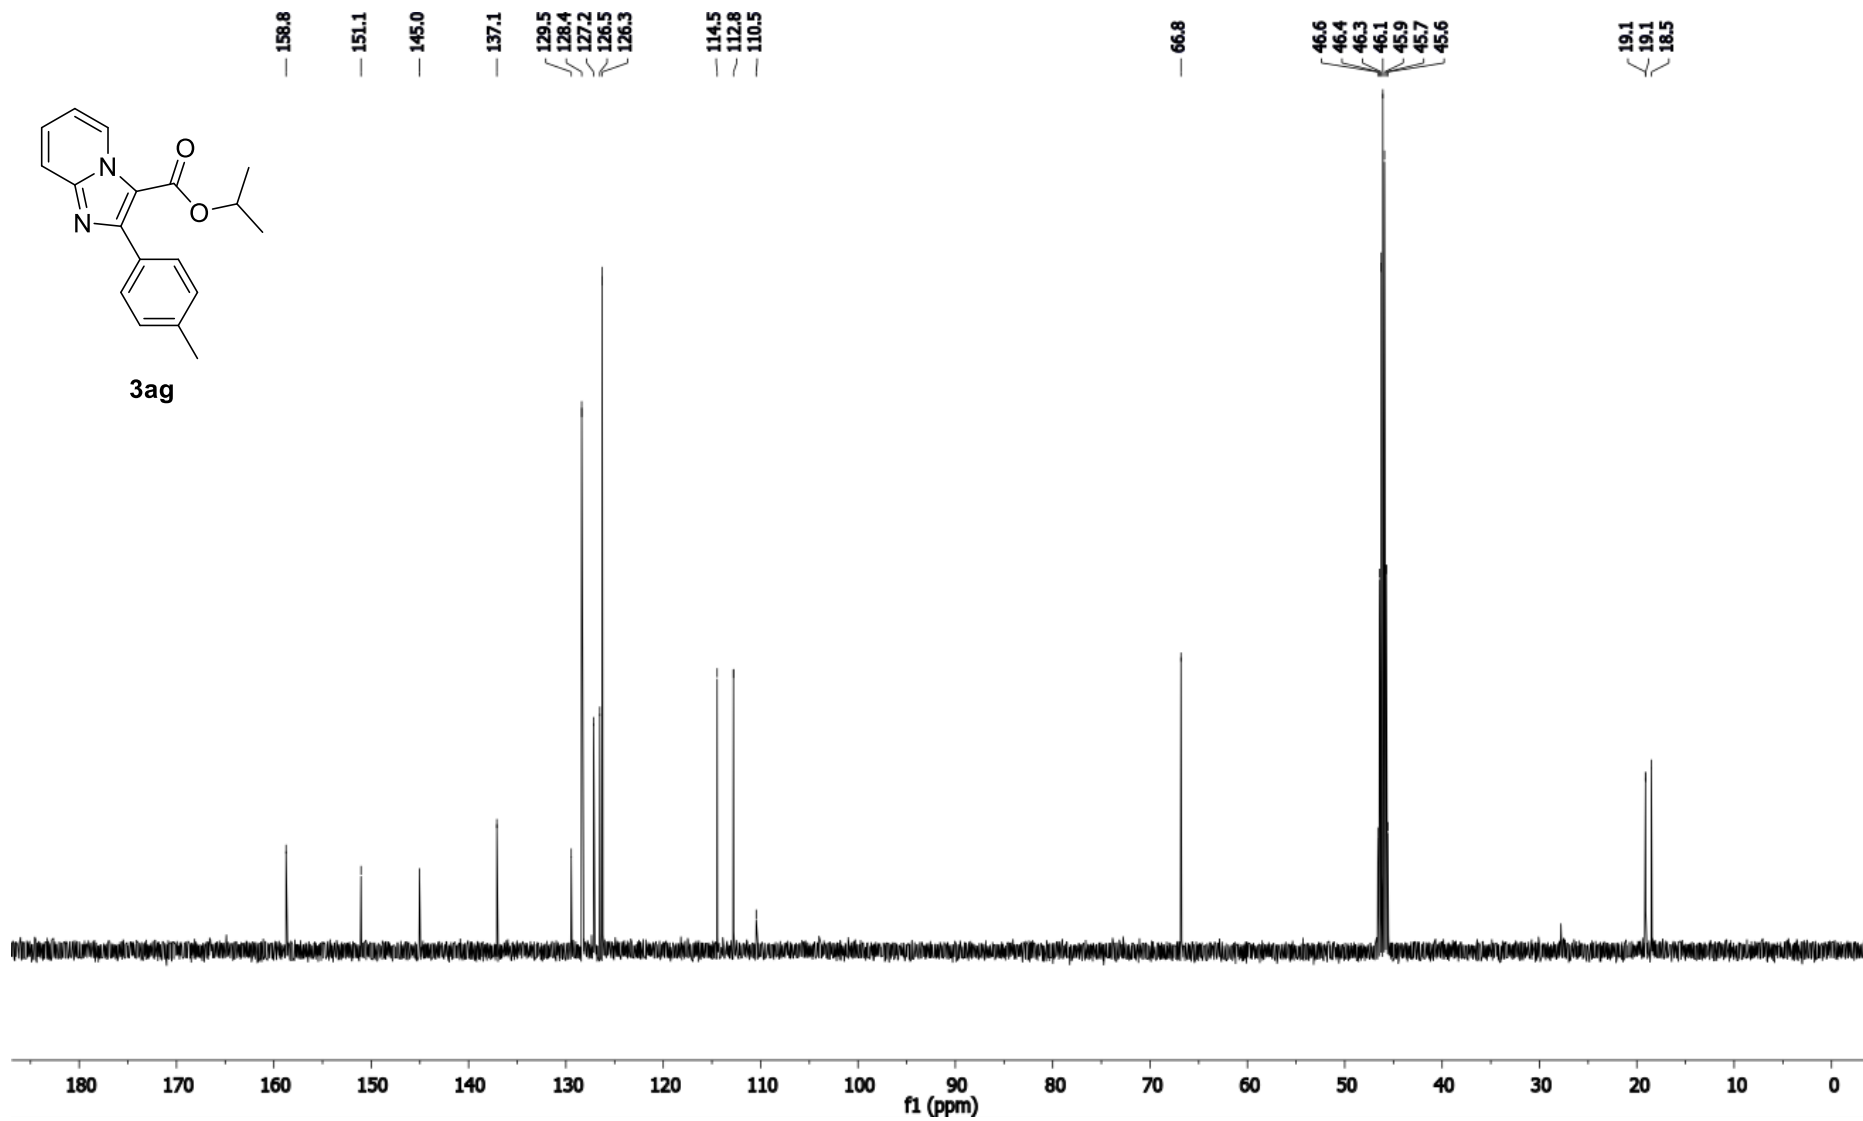

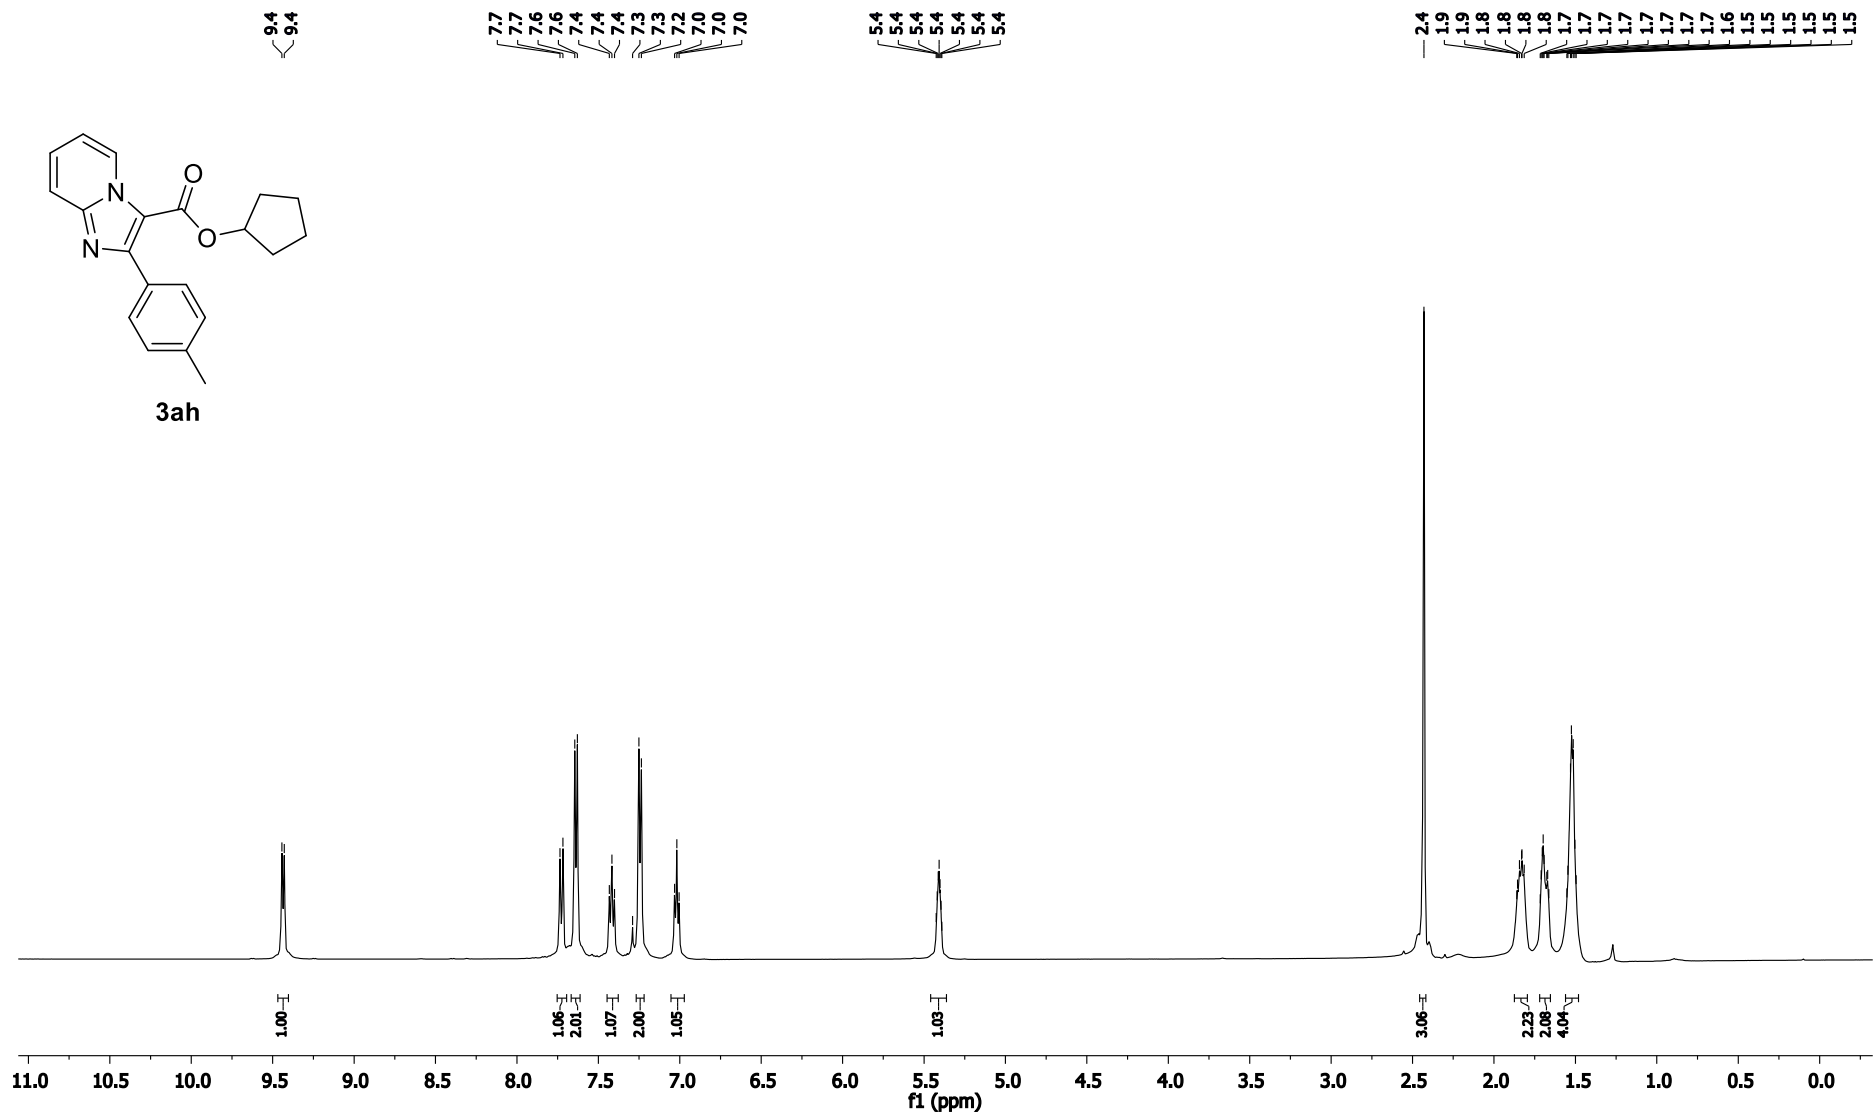

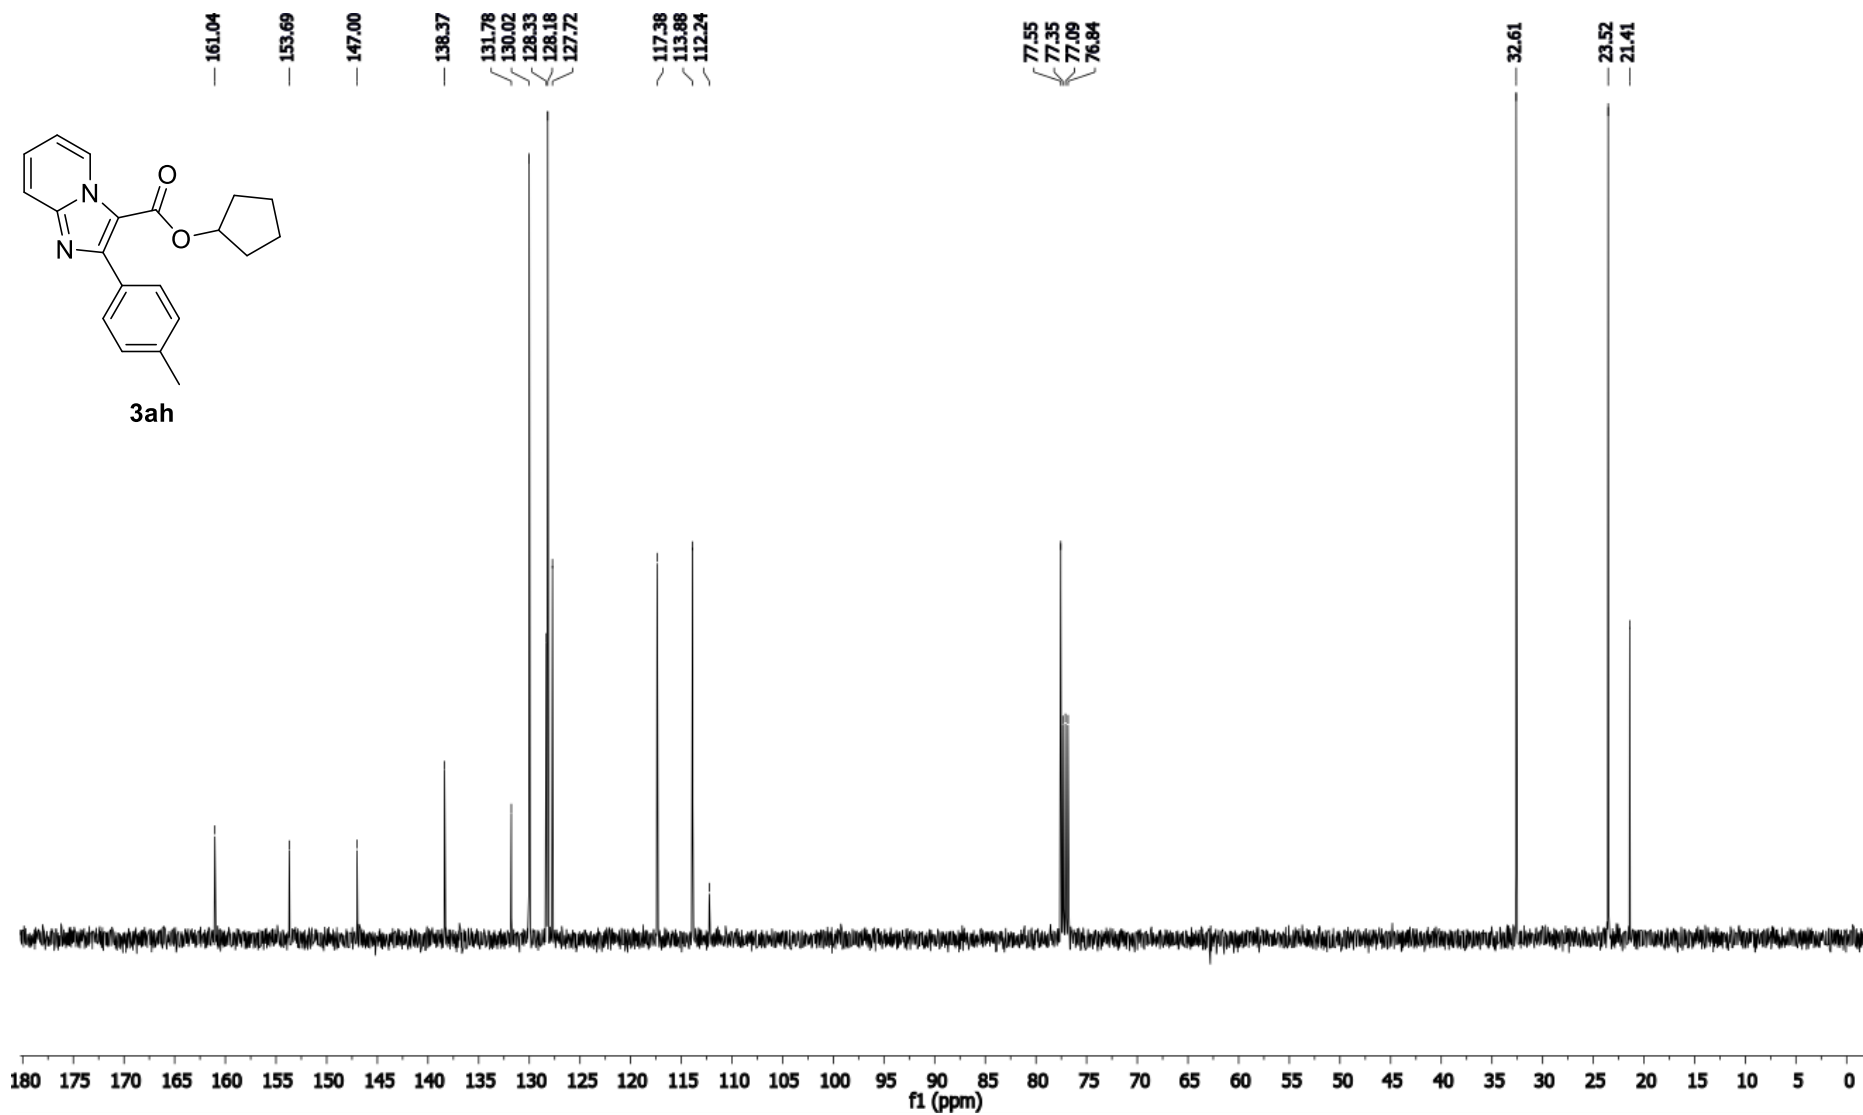

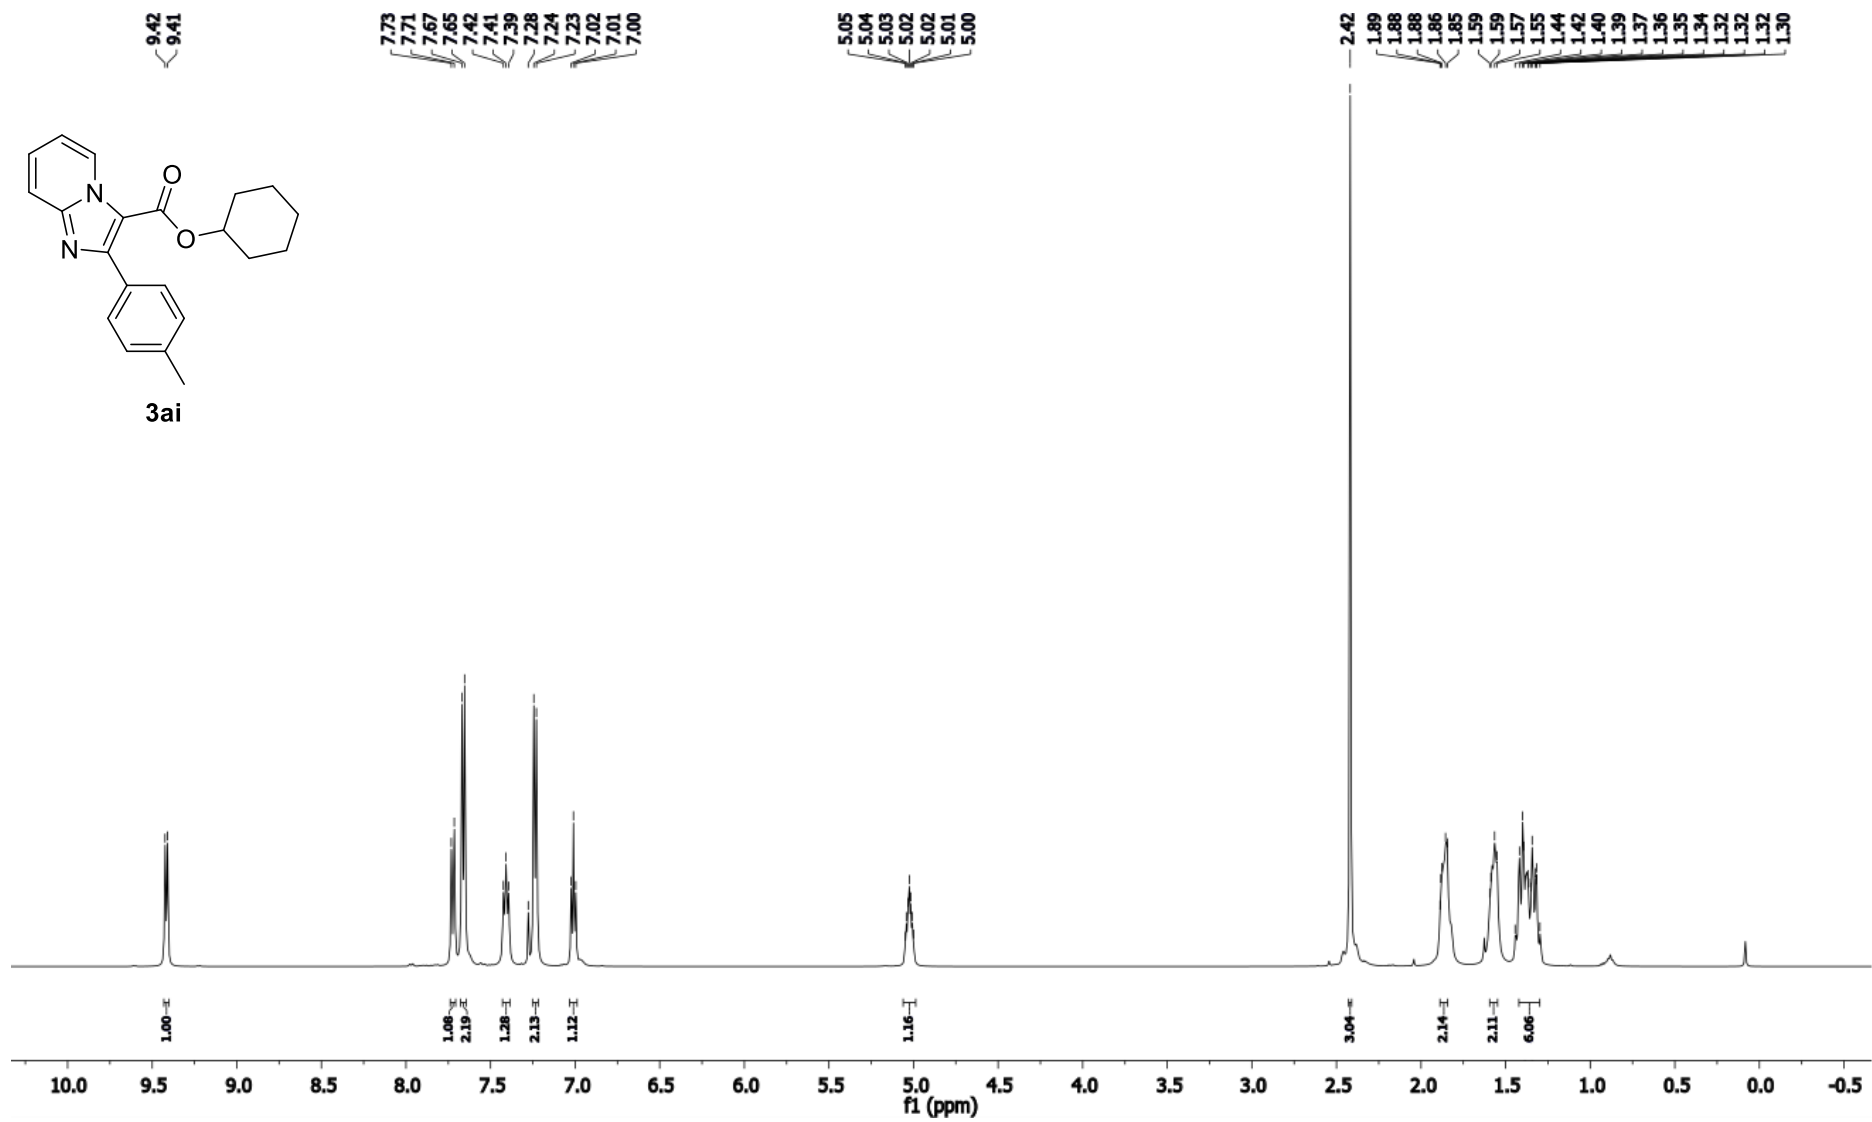



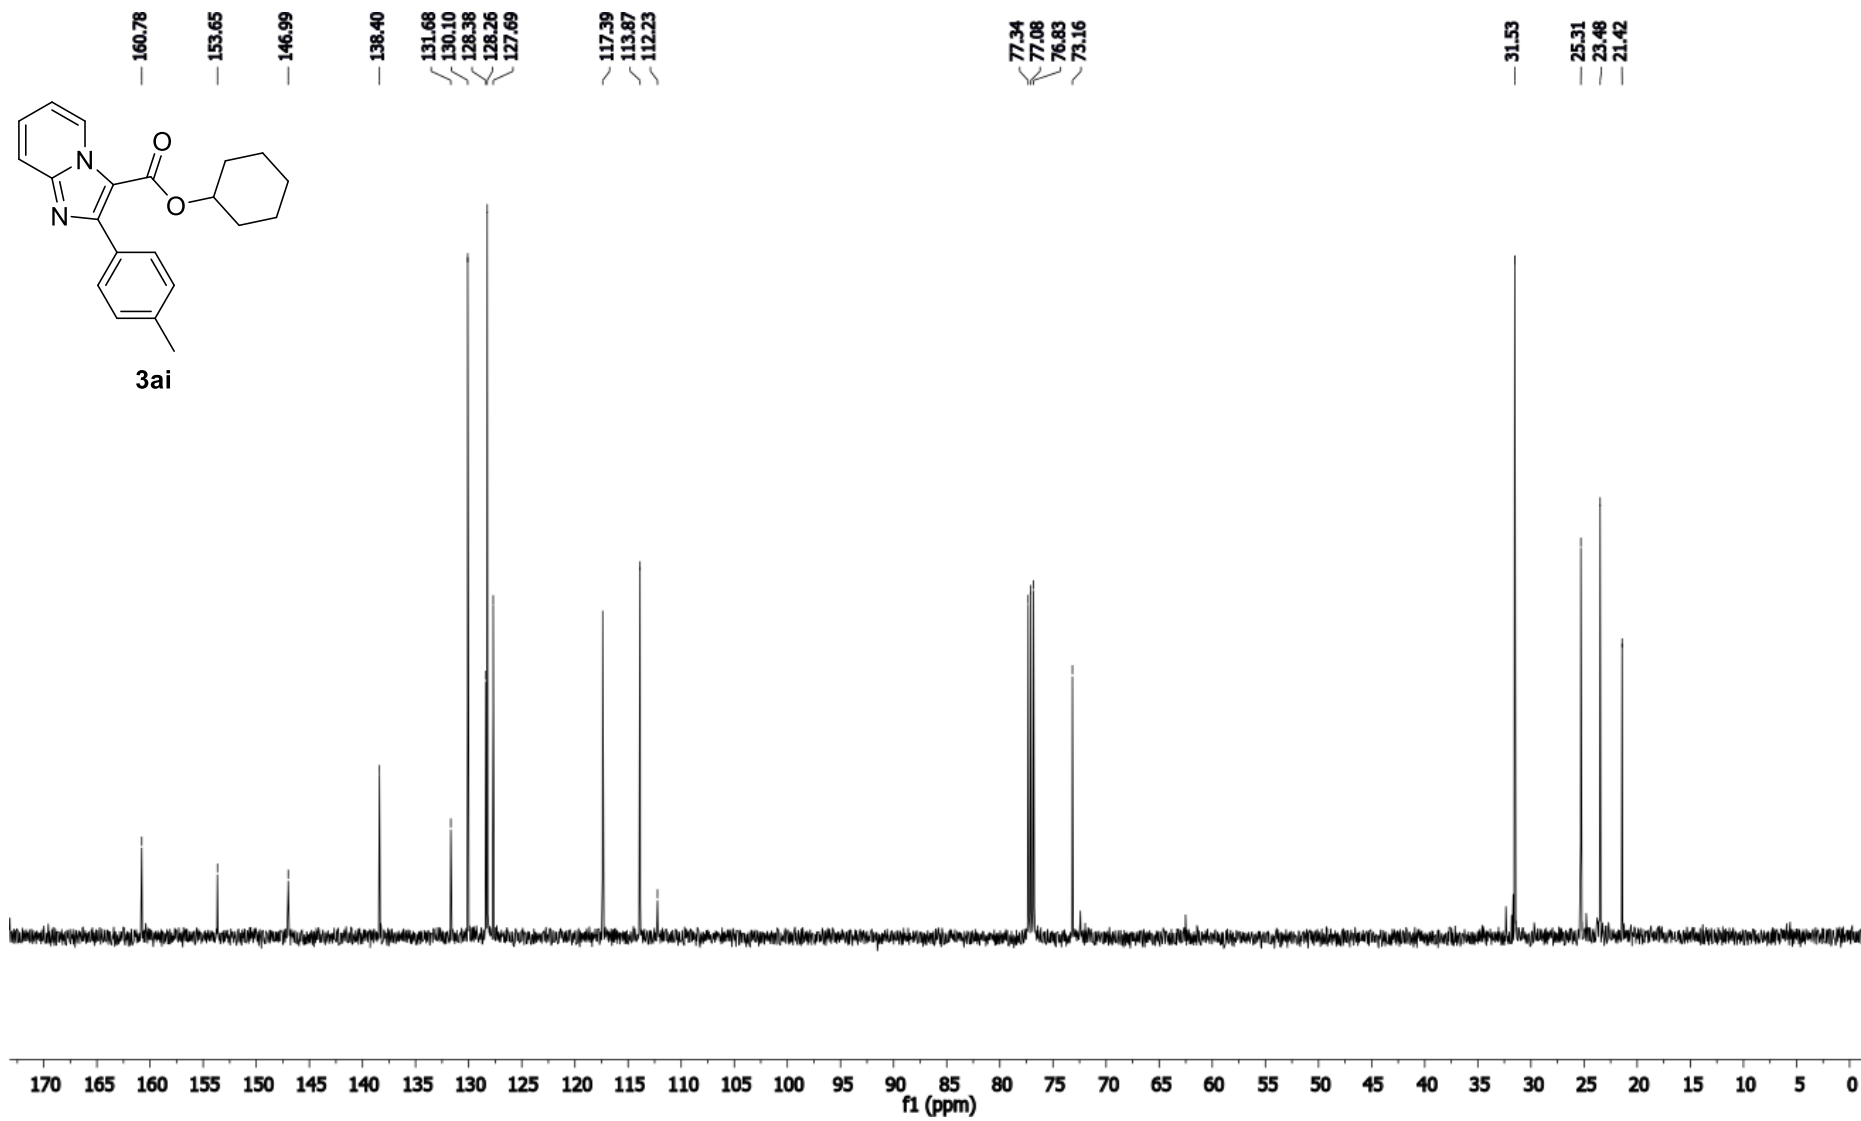

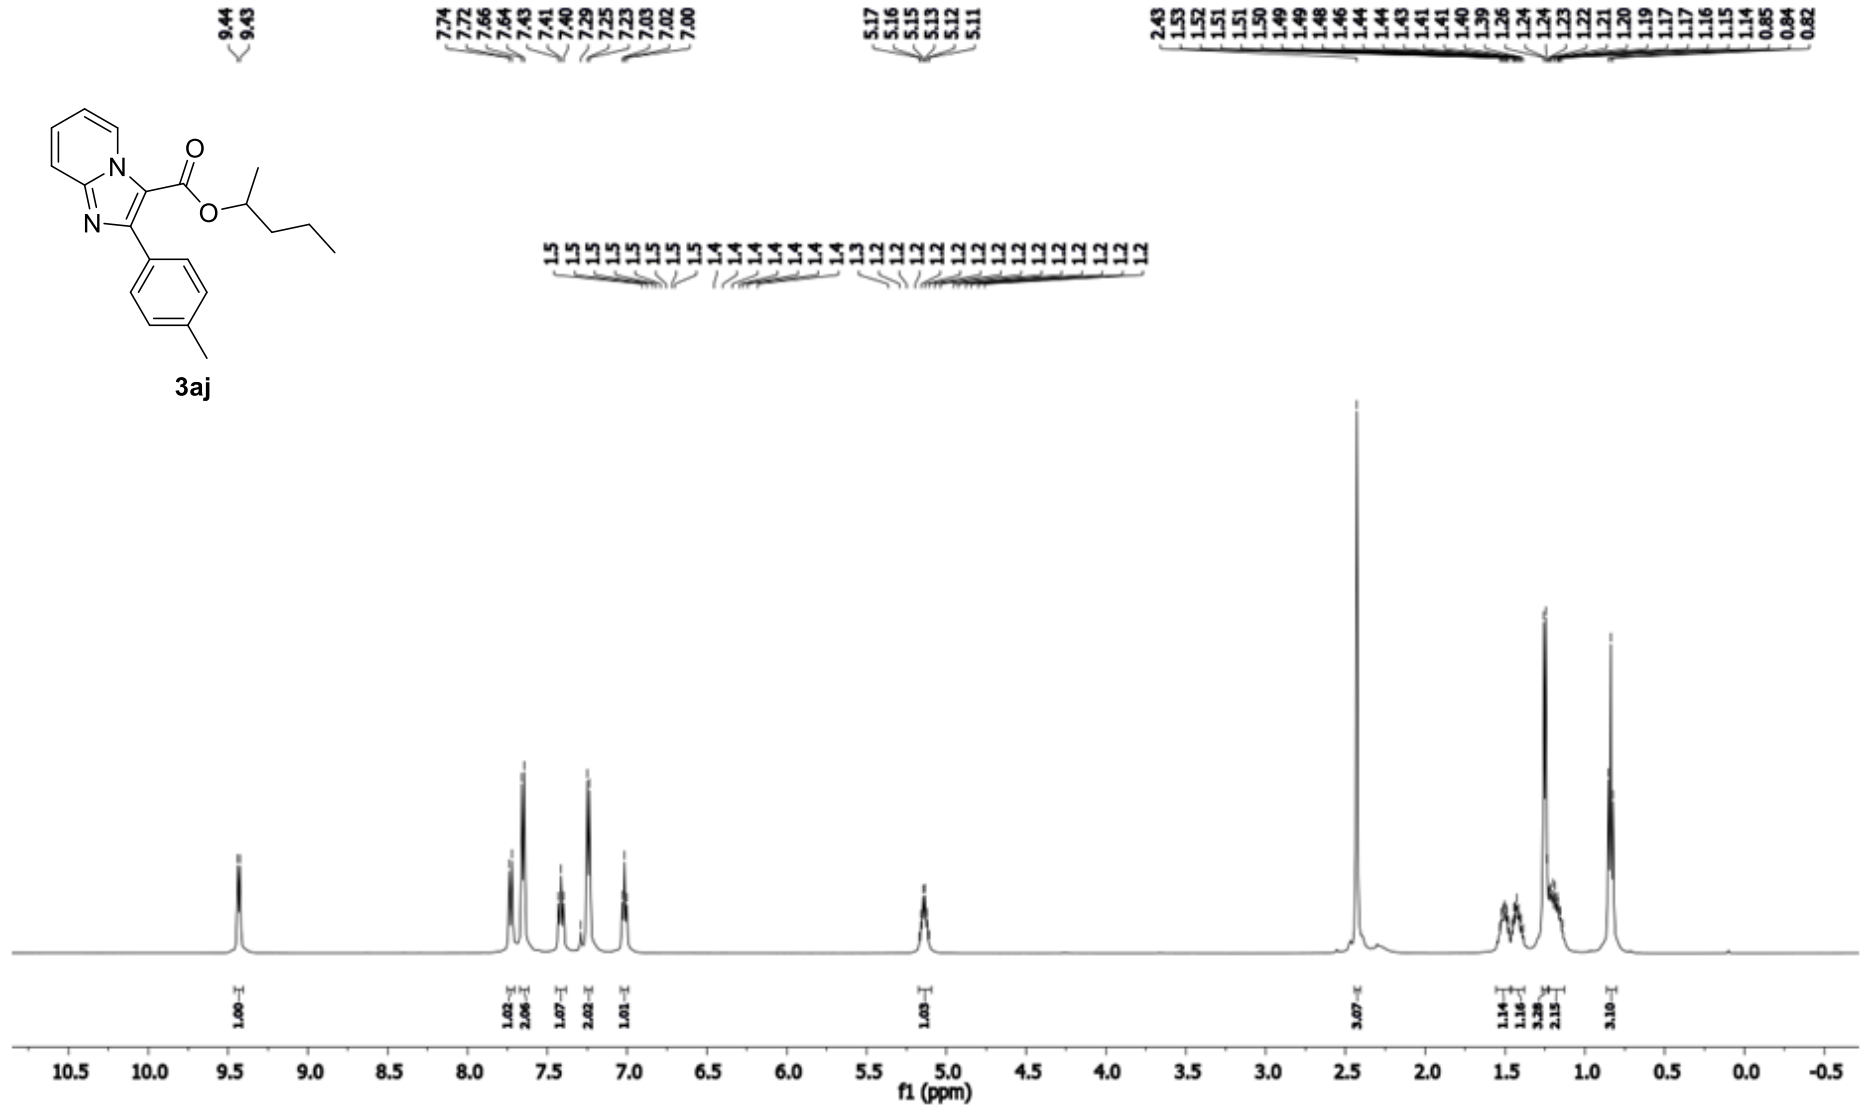

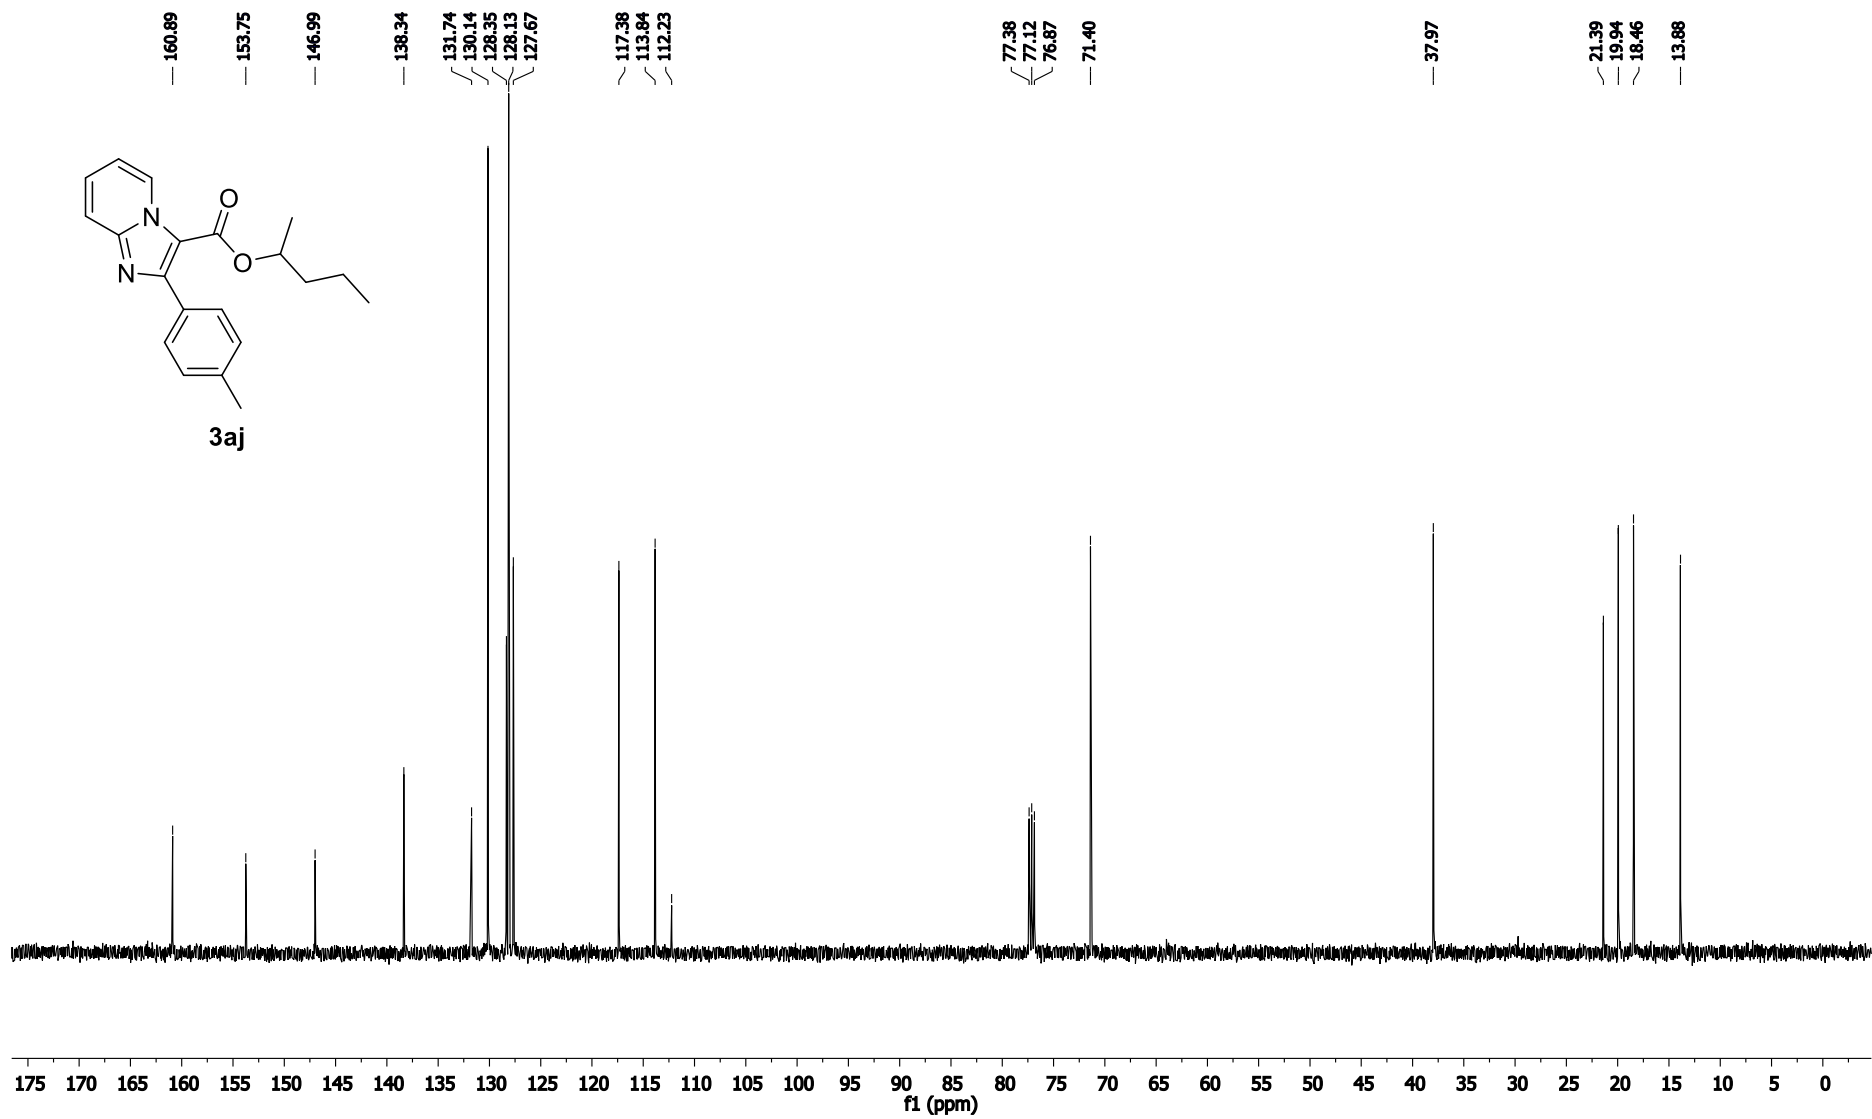

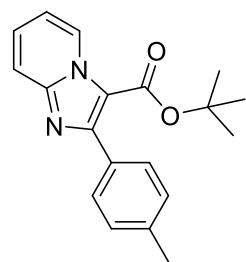

3ak

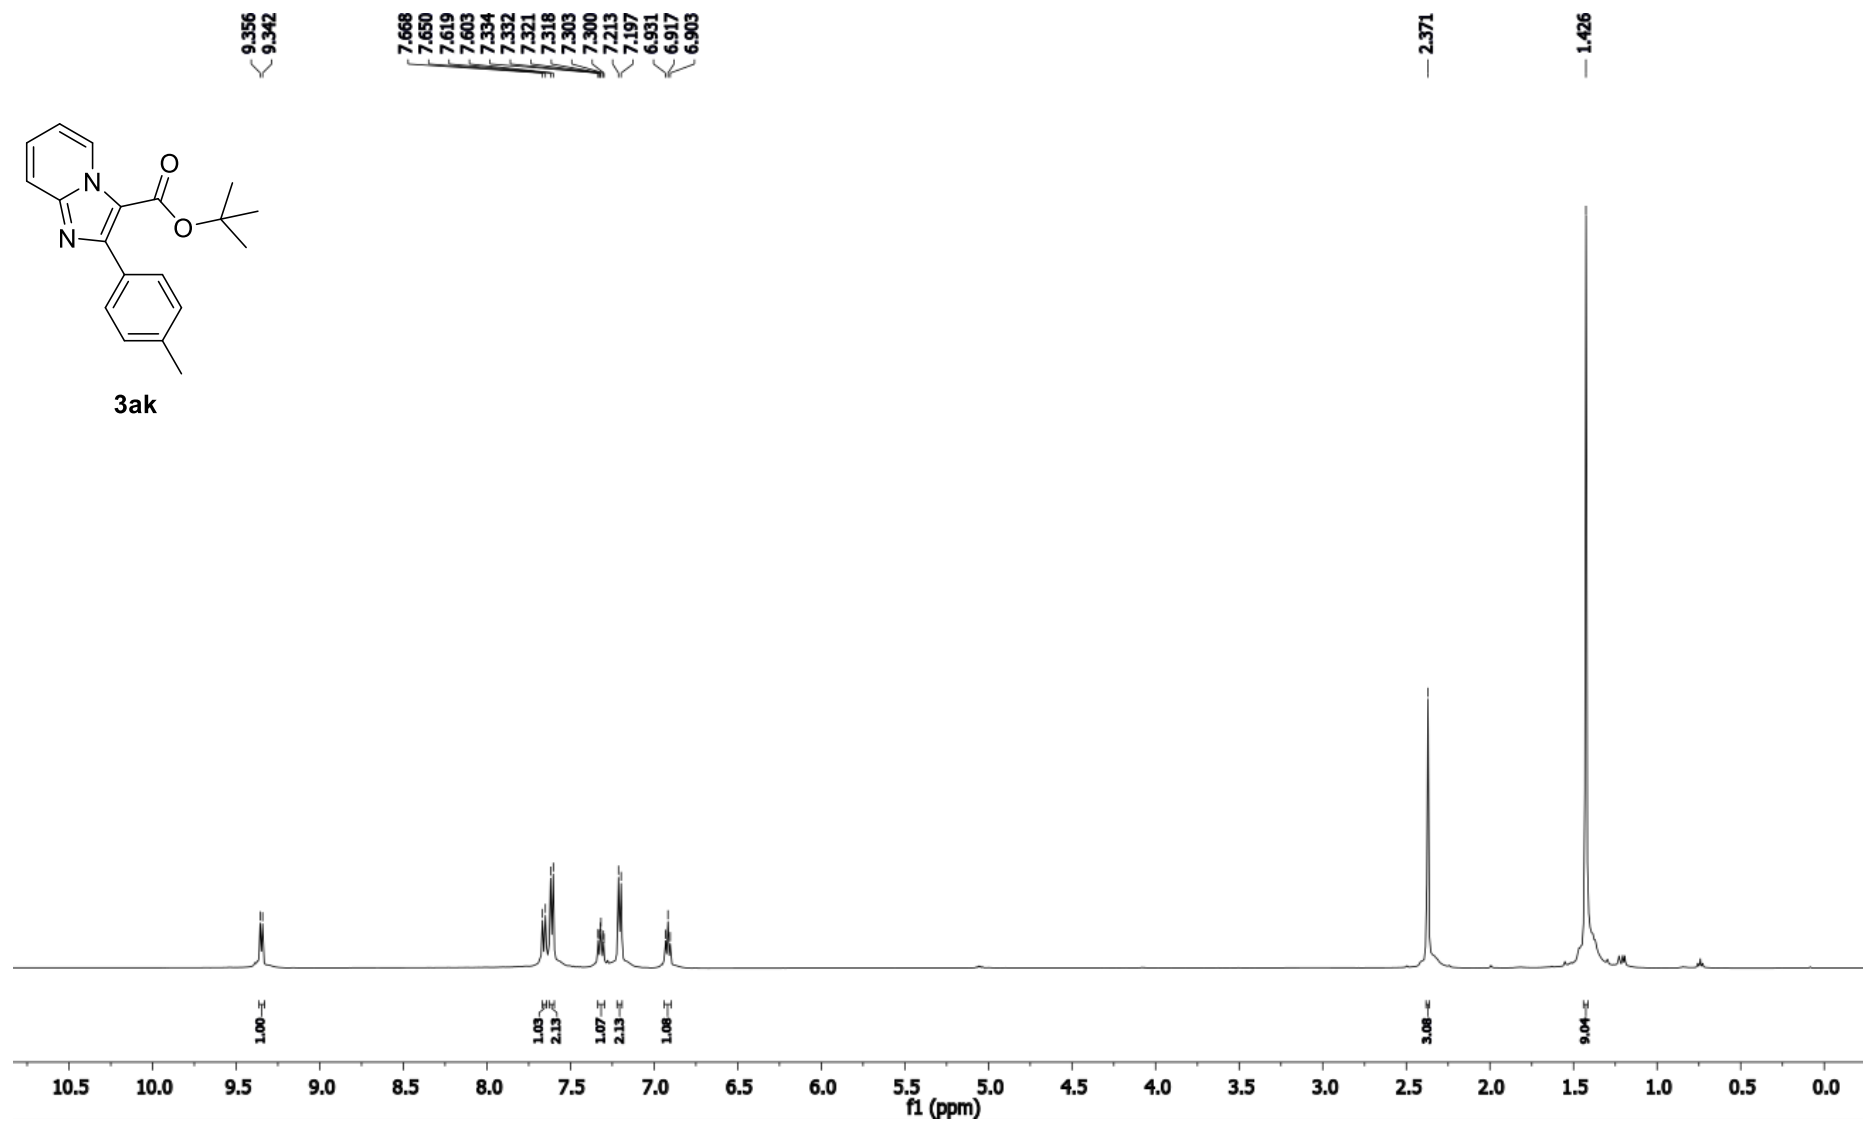

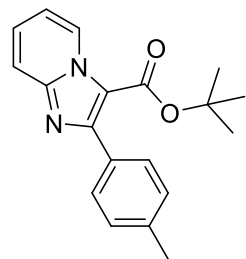

3ak

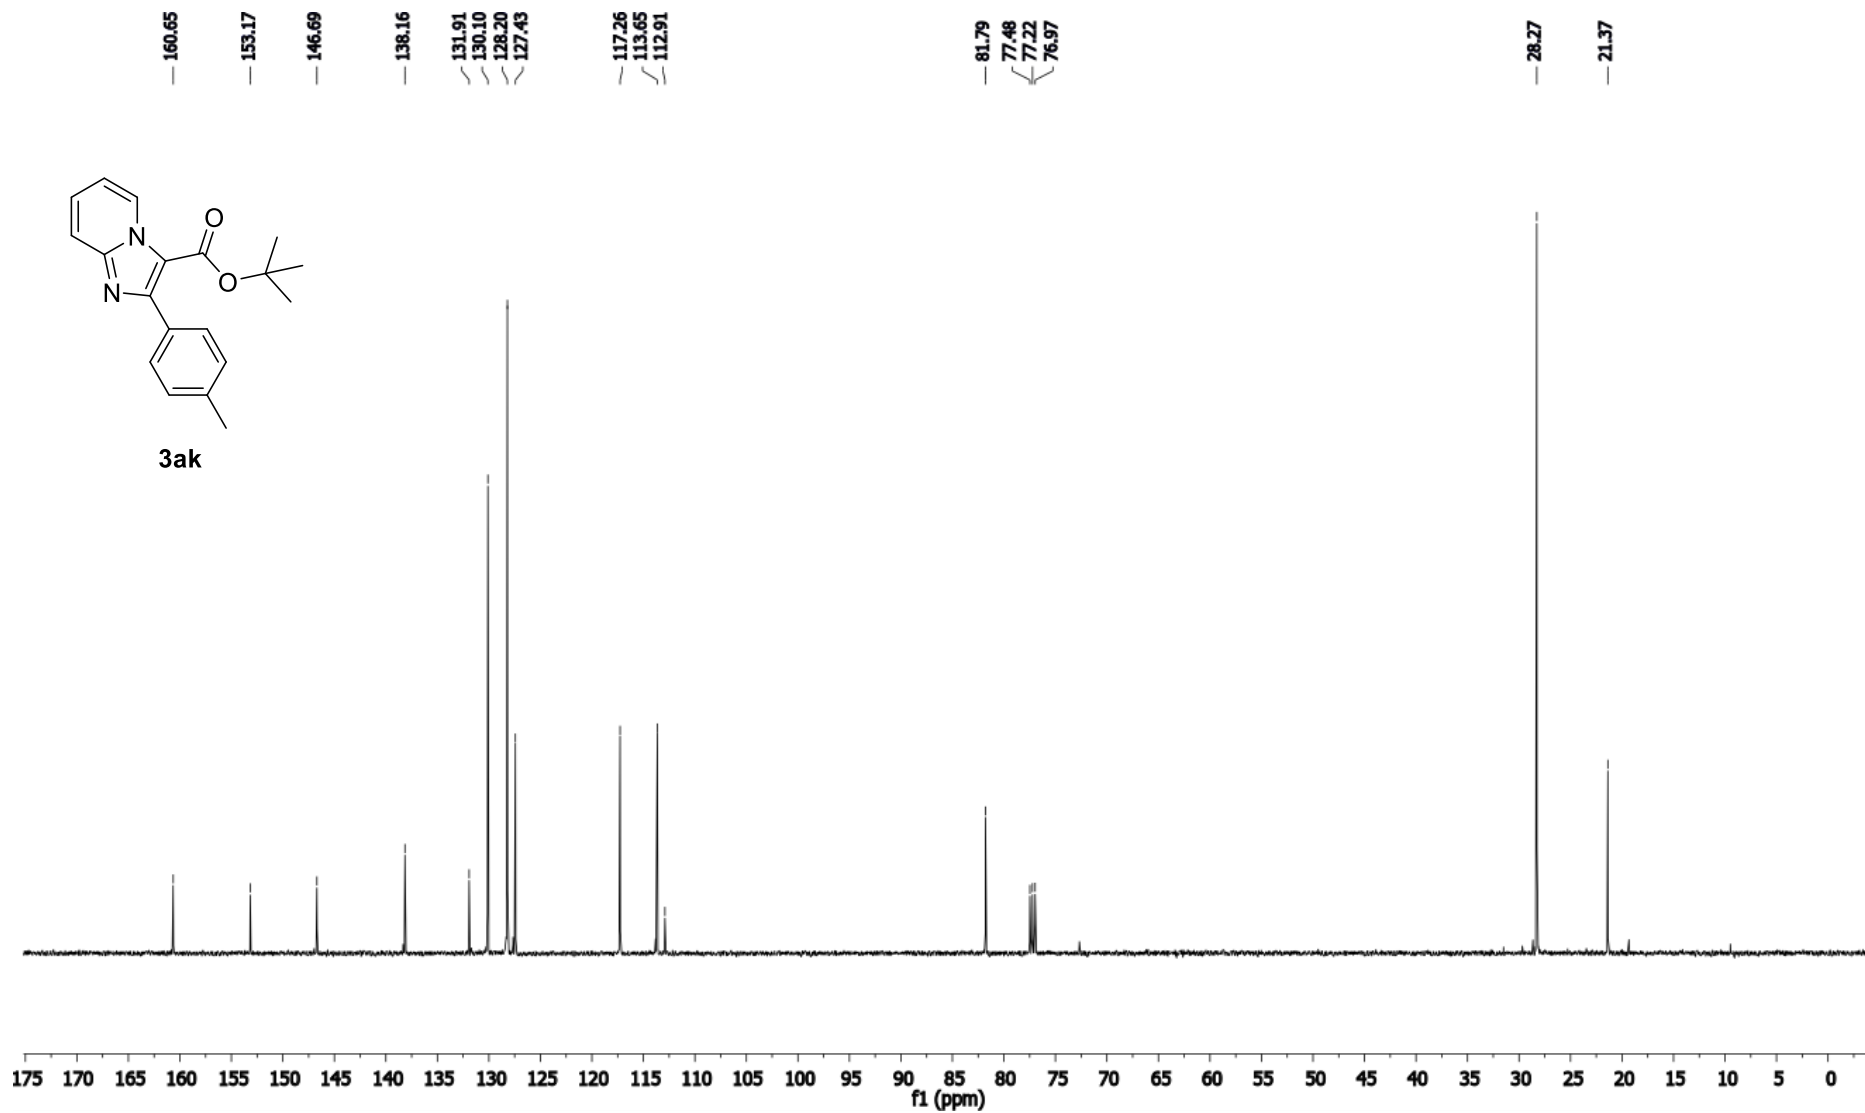

Supplement: d1nj00605c1.pdf [file d1nj00605c1.pdf]
